# Supplementary material for: A Unique TGFB1-Driven Genomic Program Links Astrocytosis, Low-Grade Inflammation and Partial Demyelination in Periplaques of Spinal Cords from Progressive Multiple Sclerosis Patients
Source: Preprints.org preprint supplement (doi:10.20944/preprints201708.0080.v1), 2017-08-23
Supplement: Supplementary file 1 [file supplementary]

## Sheet: ChEA2016 Enrichment analysis
Term	Adjusted P-value	Genes
ZNF217_24962896_ChIP-Seq_MCF-7_Human	1.3317e-05	SDC4;AHNAK;SDC2;CTNND2;GLIS3;PLOD2;MSI2;FRY;ARHGAP5;GRAMD3;TOB1;SOX2;ABLIM1;RNF19A;SPIN1;BAALC;NBN;SOX9;TMEM38B;SOX6;MTA3;NTRK2;NEBL;EYA2;PRKCA;SULF1;TIAM1;CCDC80;DAAM1;NFIA;NFIB;CD109;ID4;SIDT1;GPD1L;BMPR1B;PAM;PFN2;MEGF9
FOXA2_19822575_ChIP-Seq_HepG2_Human	1.3317e-05	AHCYL1;CTNND2;MSI2;FRY;ARHGAP5;CLU;CDH2;SLC16A9;NBN;SOX9;SOX6;KPNA3;RBM17;RALBP1;SPNS3;PRKCA;LIFR;IQCK;RCN1;ALDH5A1;MRAS;CACNB4;FAM173B;DAAM1;CD109;TXNIP;RIN1;EZR;CRK;CD44;SDC4;AHNAK;PON2;SDC2;GLIS3;ADD3;EHBP1;AGPAT3;TMEM123;ABLIM1;SPOCK2;RAB23;PCBP1;STOM;MTA3;MYH10;KLHDC2;RFTN2;FARP1;NEBL;EYA2;AKR1C2;PDE4DIP;SULF1;NFIA;PSAT1;CPE;BMPR1B;FBXL4;MEGF9
MTF2_20144788_ChIP-Seq_MESCs_Mouse	0.000112826	CTNND2;GOLIM4;FGF2;NR3C2;EDNRB;CDH2;BOC;ITGB8;SLC16A9;SOX9;SOX6;SCARA3;PRKCA;SOX11;ATP1B2;SIRT1;MLF1;PYGO1;AR;ALDH5A1;MRAS;CACNB4;NRG3;MDFIC;CD109;KIT;RRAGD;SIDT1;NAT8L;KCTD15;SLC22A4;NOTCH2;RASL12;AHNAK;PON2;GLIS3;AEBP1;ADD3;ADCY8;TOB1;PCDH18;AGPAT3;SPOCK2;CAP2;MFAP3L;KLHDC2;NTRK2;FARP1;FZD3;NEBL;PDE4DIP;GNG12;PLCXD3;NFIA;NFIB;ID4;CPE
STAT3_18555785_ChIP-Seq_MESCs_Mouse	0.000153988	YAP1;GPM6A;SDC4;UXS1;CTNND2;GLIS3;PBXIP1;MSI2;FRY;PCDH18;AGPAT3;GLIS2;SOX2;ABLIM1;EDNRB;CDH2;NNT;PCBP1;TMEM38B;MTA3;SMAD2;LGI1;IL33;FARP1;RBM17;NEBL;EYA2;GFPT2;LIFR;ATP1B2;DAK;B3GALTL;ENAH;TIAM1;ARHGAP32;RSPH1;DAAM1;NFIB;DOK5;ID4;GPD1L;RABL5;GPR125
SUZ12_20075857_ChIP-Seq_MESCs_Mouse	0.000162664	CTNND2;GOLIM4;FMN2;FGF2;NR3C2;EDNRB;CDH2;DPYSL3;BOC;ITGB8;SLC16A9;SOX9;NANOS1;SCARA3;PRKCA;SOX11;ATP1B2;MLF1;PYGO1;AR;ALDH5A1;MRAS;CACNB4;MDFIC;NRG3;DOK5;CD109;RRAGD;SIDT1;RIN1;NAT8L;GPR125;KCTD15;CD44;PFN2;SLC22A4;NOTCH2;RASL12;AHNAK;SYNPO2;PON2;GLIS3;AEBP1;ADCY8;GRAMD3;ADD3;PCDH18;AGPAT3;GLIS2;ABLIM1;ZMAT3;SPOCK2;RAB23;GPC4;CAP2;MFAP3L;KLHDC2;NTRK2;FARP1;SMAD1;FZD3;NEBL;PDE4DIP;GNG12;GFAP;PLCXD…
PIAS1_25552417_ChIP-Seq_VCAP_Human	0.000192332	LGI1;ACSS3;EYA2;PLOD2;LIFR;FMN2;MAT2B;SULF1;GRAMD3;GNG12;NR3C2;AR;ARHGAP32;TIAM1;CDH2;NRG3;DAAM1;PSAT1;DOK5;CDC42EP4;ID4;STEAP2;CD200
SUZ12_18692474_ChIP-Seq_MESCs_Mouse	0.000447151	PON2;CTNND2;GLIS3;AEBP1;ADCY8;CLU;FGF2;PCDH18;EDNRB;CDH2;SPOCK2;BOC;SLC16A9;SOX9;SOX6;JAM2;MFAP3L;NTRK2;FARP1;SCARA3;FZD3;NEBL;PDE4DIP;PRKCA;SOX11;MLF1;PYGO1;AR;PLCXD3;MRAS;CACNB4;NRG3;NFIA;NFIB;DOK5;CD109;SIDT1;ID4;NAT8L;PAM
PAX3-FKHR_20663909_ChIP-Seq_RHABDOMYOSARCOMA_Human	0.000462793	ACSS3;GMPR;MSI2;KLHL13;FRY;GRAMD3;RYR3;TMEM123;EDNRB;ITGB8;BAALC;SOX6;NANOS1;NEBL;EYA2;LMO3;PDE4DIP;PRKCA;SULF1;ENAH;CCDC80;NFIA;DOK5;NFIB;TXNIP;MDM1;PFN2
SOX9_24532713_ChIP-Seq_HFSC_Mouse	0.000462793	NOTCH2;AHNAK;PON2;HSPB8;FAM13A;AK1;GOLIM4;GMPR;FRY;PDLIM3;ABLIM1;BOC;ITGB8;KPNA3;MFAP3L;IL33;FARP1;EYA2;PRKCA;ENAH;TIAM1;CACNB4;DAAM1;NFIB;RABL3;ID4;TXNIP;CPE;EZR;CD44;GPR125;BMPR1A
AR_22383394_ChIP-Seq_PROSTATE_CANCER_Human	0.000462793	YAP1;ACSS3;AHNAK;ARHGAP5;GRAMD3;TOB1;CLU;PCDH18;RYR3;NR3C2;STOM;ITGB8;SOX9;MYH10;CAP2;RALBP1;NEBL;EYA2;LMO3;EPHX1;PRKCA;LIFR;PRDX6;TIAM1;PLCXD3;NRG3;NFIA;DAAM1;MDFIC;PSAT1;RABL3;SIDT1;ID4;SPARCL1;AIDA;GPD1L;BMPR1B;FBXL4;GPR125
STAT3_23295773_ChIP-Seq_U87_Human	0.000462793	AHCYL1;CTNND2;FAM13A;GOLIM4;PLOD2;MSI2;CLU;RYR3;AQP1;NR3C2;NNT;RNF19A;SLC16A9;NBN;TMEM38B;DENND2A;PRKCA;SIRT1;TIAM1;IQCK;RCN1;CACNB4;DAAM1;MDFIC;NRG3;DOK5;CDH10;CD109;KIT;GPR125;KCTD15;GLIS3;MAT2B;ADCY8;GRAMD3;TOB1;EHBP1;AGPAT3;ABLIM1;PDLIM3;SPOCK2;TP53BP2;STK38L;MYH10;RFTN2;GFPT2;PDE4DIP;GNG12;PLCXD3;NFIA;DPY19L3;CNTN1;FBXL4;CD200;MEGF9;BMPR1A
HNF4A_19822575_ChIP-Seq_HepG2_Human	0.000462793	AHCYL1;CAB39L;UXS1;CTNND2;GOLIM4;PLOD2;ZNF45;MSI2;FRY;ARHGAP5;CLU;CDH2;RNF19A;SPIN1;SLC16A9;SOX9;SOX6;KPNA3;RALBP1;SCARA3;SPNS3;DENND2A;PRKCA;LIFR;SIRT1;TIAM1;RCN1;ALDH5A1;MRAS;CACNB4;FAM173B;DAAM1;DOK5;CDC42EP4;RRAGD;SIDT1;SPARCL1;EZR;CRK;STEAP2;GPR125;KCTD15;CD44;YAP1;RASL12;ACSS3;SDC4;AHNAK;SDC2;PON2;GLIS3;ATP1A2;ADCY8;ADD3;TOB1;EHBP1;AGPAT3;TMEM123;ABLIM1;PDLIM3;ZMAT3;PCBP1;SPOCK2;ZNHIT6;STOM…
AR_19668381_ChIP-Seq_PC3_Human	0.000526936	CTNND2;MLC1;PLOD2;MSI2;FMN2;FRY;ARHGAP5;RYR3;NR3C2;SOX2;CDH2;BOC;SPIN1;ITGB8;BAALC;SOX9;SOX6;TMEM38B;PRKCA;SOX11;TIAM1;AR;ALDH5A1;MRAS;MDFIC;NRG3;CDH10;CDC42EP4;SPARCL1;GPR125;KCTD15;GPM6A;SDC2;GMPR;PBXIP1;KLHL13;ADCY8;ADD3;EHBP1;AGPAT3;GLIS2;ZMAT3;MYH10;CAP2;NTRK2;FARP1;FZD3;NEBL;PDE4DIP;AKR1C2;SULF1;PLCXD3;NFIA;NFIB;PSAT1;CNTN1;CD24;PAM;MDM1;BMPR1A
NANOG_19829295_ChIP-Seq_ESCs_Human	0.000556725	YAP1;AHCYL1;CAB39L;SDC2;FAM13A;GOLIM4;PLOD2;MAT2B;FMN2;ADD3;ADCY8;TOB1;EHBP1;ABLIM1;PDLIM3;ZMAT3;DPYSL3;SLC16A9;KPNA3;MFAP3L;RALBP1;NEBL;LIFR;DAK;PYGO1;TIAM1;CCDC80;NRG3;NFIA;NFIB;RABL3;ID4;SERPING1;RIN1;BMPR1B;EZR;FBXL4;CD44;GPR125;BMPR1A
FOXM1_26456572_ChIP-Seq_MCF-7_Human	0.000556725	SLC22A4;NOTCH2;AHCYL1;ANKRD35;CTNND2;FAM13A;PLOD2;MSI2;ARHGAP5;ADD3;GRAMD3;EHBP1;SOX2;ABLIM1;TP53BP2;STOM;BAALC;SLC16A9;SOX9;MTA3;CAP2;NANOS1;RFTN2;LGI1;EYA2;PDE4DIP;SULF1;TIAM1;ARHGAP32;RCN1;NFIA;DAAM1;MDFIC;NFIB;DOK5;SIDT1;SPARCL1;ZNF853;GPD1L;MEGF9
SOX2_19829295_ChIP-Seq_ESCs_Human	0.000556725	YAP1;AHCYL1;CAB39L;SDC2;FAM13A;GOLIM4;PLOD2;MAT2B;FMN2;ADD3;ADCY8;TOB1;EHBP1;ABLIM1;PDLIM3;ZMAT3;DPYSL3;SLC16A9;KPNA3;MFAP3L;RALBP1;NEBL;LIFR;DAK;PYGO1;TIAM1;CCDC80;NRG3;NFIA;NFIB;RABL3;ID4;SERPING1;RIN1;BMPR1B;EZR;FBXL4;CD44;GPR125;BMPR1A
WT1_25993318_ChIP-Seq_PODOCYTE_Human	0.000556725	ANKRD35;UXS1;CTNND2;FAM13A;GOLIM4;MSI2;EDNRB;RNF19A;BOC;ITGB8;FBXO8;SOX6;NANOS1;SCARA3;CERS6;SPNS3;DENND2A;PRKCA;SOX11;TIAM1;RCN1;CACNB4;FAM173B;DAAM1;NRG3;CDH10;CDIP1;SERPING1;CRK;PFN2;SDC4;GMPR;AEBP1;MAT2B;GRAMD3;ADD3;TOB1;ABLIM1;STOM;CAP2;SMAD2;NTRK2;IL33;FARP1;NEBL;EYA2;EPHX1;PDE4DIP;SULF1;GNG12;NFIA;DPY19L3;NFIB;PSAT1;CNTN1;BMPR1B;FBXL4;PAM;MEGF9
ISL1_27105846_Chip-Seq_CPCs_Mouse	0.000556911	CTNND2;GMPR;MSI2;ADD3;AQP1;SOX2;EDNRB;CDH2;NNT;PCBP1;STK38L;GPC4;FBXO8;TMEM38B;SOX6;CAP2;MFAP3L;SMAD2;LGI1;FARP1;EYA2;LMO3;GFPT2;LYSMD4;SOX11;SULF1;PYGO1;NFIB;DOK5;KIT;SERPING1;NAT8L;RABL5;GPR125
TBX3_20139965_ChIP-Seq_ESCs_Mouse	0.000757035	HSPB8;GLIS3;ADD3;GRAMD3;GLIS2;ABLIM1;GPC4;SOX9;FBXO8;SOX6;MTA3;LGI1;NTRK2;LIFR;SULF1;SIRT1;ENAH;DAAM1;DOK5;NFIB;KIT;CNTN1;SERPING1;RABL5;KCTD15;MDM1
TBX3_20139965_ChIP-Seq_MESCs_Mouse	0.000757035	HSPB8;GLIS3;ADD3;GRAMD3;GLIS2;ABLIM1;GPC4;SOX9;FBXO8;SOX6;MTA3;LGI1;NTRK2;LIFR;SULF1;SIRT1;ENAH;DAAM1;DOK5;NFIB;KIT;CNTN1;SERPING1;RABL5;KCTD15;MDM1
OLIG2_23332759_ChIP-Seq_OLIGODENDROCYTES_Mouse	0.000757035	NOTCH2;ACSS3;SYNPO2;GOLIM4;GMPR;PLOD2;MAT2B;ARHGAP5;GRAMD3;PCDH18;NR3C2;SOX2;PDLIM3;CDH2;ZNHIT6;DPYSL3;ITGB8;GPC4;FBXO8;SOX6;JAM2;SMAD2;PRKCA;LIFR;SOX11;TIAM1;RCN1;NFIA;DPY19L3;DAAM1;MDFIC;PSAT1;CDH10;ID4;CPE;CD24;EZR;PAM;CD44;MEGF9
TP63_23658742_ChIP-Seq_EP156T_Human	0.00098056	ANKRD35;CTNND2;GOLIM4;MLC1;PLOD2;MSI2;ARHGAP5;TMEM47;RNF19A;BOC;ITGB8;BAALC;DIRC2;KPNA3;NANOS1;SCARA3;SPNS3;LMO3;RCN1;CCDC80;CD109;SERPING1;RIN1;NAT8L;GPR125;KCTD15;CD44;NOTCH2;GPM6A;SDC4;AHNAK;GLIS3;GMPR;XIAP;ATP1A2;KLHL13;MAT2B;ADCY8;GRAMD3;TMEM123;ABLIM1;PDLIM3;ZNHIT6;STOM;GPC4;CAP2;LGI1;NTRK2;IL33;SMAD1;EYA2;GNG12;GFAP;RSPH1;NFIA;NFIB;PSAT1;CNTN1;MEGF9;MDM1
CEBPD_21427703_ChIP-Seq_3T3-L1_Mouse	0.00130367	NOTCH2;FAM13A;GOLIM4;GLIS3;MAT2B;FMN2;ADD3;FGF2;PCDH18;NR3C2;ABLIM1;PDLIM3;PCBP1;BOC;ITGB8;STK38L;SLC16A9;SOX9;TMEM38B;SMAD2;GFPT2;DENND2A;ENAH;RCN1;CCDC80;NFIA;DAAM1;MDFIC;NFIB;TXNIP;BMPR1B;STEAP2;KCTD15;GPR125;MDM1
P300_19829295_ChIP-Seq_ESCs_Human	0.00196158	ACSS3;UXS1;MSI2;FMN2;FRY;ADD3;ADCY8;GRAMD3;PCDH18;RYR3;TMEM47;SOX2;ABLIM1;PDLIM3;EDNRB;ZMAT3;DPYSL3;STK38L;SLC16A9;GPC4;TMEM38B;KPNA3;CAP2;RFTN2;LGI1;SOX11;SULF1;ALDH5A1;NFIA;MDFIC;NFIB;PSAT1;DOK5;CDH10;KIT;CNTN1;ID4;EZR
MEIS1_26253404_ChIP-Seq_OPTIC_CUPS_Mouse	0.00196158	YAP1;GPM6A;SDC2;CTNND2;FAM13A;ADD3;RYR3;SOX2;ABLIM1;ZNHIT6;DPYSL3;ITGB8;SLC16A9;SOX9;MFAP3L;KLHDC2;SMAD2;LGI1;FARP1;RALBP1;SCARA3;FZD3;LMO3;LIFR;LYSMD4;SOX11;MLF1;ARHGAP32;CACNB4;NRG3;DAAM1;CNTN1;BMPR1B;IL17D;EZR;PAM;CRK;MEGF9
SMAD4_21799915_ChIP-Seq_A2780_Human	0.0019925	SLC22A4;CTNND2;HSPB8;FHL1;GLIS3;MSI2;MAT2B;FMN2;FRY;GRAMD3;BAALC;SLC16A9;SOX9;SOX6;MYH10;JAM2;MFAP3L;LGI1;IL33;SMAD1;PRPF38A;NEBL;LMO3;PDE4DIP;PRKCA;LIFR;PRDX6;PYGO1;CLEC4A;AR;PLCXD3;CCDC80;CACNB4;NRG3;NFIA;DAAM1;NFIB;CD109;CNTN1;GPD1L;BMPR1B;GPR125;MDM1;PFN2
SMAD3_22036565_ChIP-Seq_ESCs_Mouse	0.00203643	NTRK2;ANKRD35;GFPT2;HSPB8;GLIS3;PRKCA;LIFR;MSI2;ATP1B2;SULF1;GRAMD3;AGPAT3;SOX2;RSPH1;MRAS;CDH2;DOK5;NFIB;TXNIP;SERPING1;EZR;MTA3;PAM;JAM2
PRDM14_21183938_ChIP-Seq_MESCs_Mouse	0.00208069	SDC4;ANKRD35;HSPB8;GLIS3;GRAMD3;TOB1;AGPAT3;SOX2;PCBP1;RNF19A;BOC;SPIN1;SLC16A9;SOX9;MTA3;MYH10;LGI1;EYA2;GFPT2;DENND2A;LIFR;SOX11;SULF1;ARHGAP32;MDFIC;NFIB;DOK5;CDH10;CDC42EP4;CD109;KIT;RRAGD;ID4;CPE;SPARCL1;RIN1;GPR125
PPARD_21283829_ChIP-Seq_MYOFIBROBLAST_Human	0.00208069	AHCYL1;CAB39L;CTNND2;FAM13A;PLOD2;MSI2;FMN2;FRY;CLU;RYR3;CDH2;TMEM38B;NANOS1;RBM17;RALBP1;SPNS3;PRKCA;LIFR;SOX11;MRAS;CACNB4;FAM173B;NRG3;CDH10;CD109;KIT;TXNIP;STEAP2;RABL5;CD44;GPM6A;AHNAK;GLIS3;MAT2B;GRAMD3;PCDH18;GLIS2;TMEM123;ZMAT3;PCBP1;TP53BP2;CAP2;FARP1;PDE4DIP;GNG12;DAK;B3GALTL;NFIA;NFIB;PSAT1;ID4;GPD1L;BMPR1B;PAM;MEGF9;MDM1
SOX2_20726797_ChIP-Seq_SW620_Human	0.0021149	AHNAK;CAB39L;UXS1;FHL1;PLOD2;MSI2;FRY;GLIS2;TMEM47;SOX2;ABLIM1;NNT;TSPAN6;DPYSL3;ITGB8;STK38L;SLC16A9;GPC4;DIRC2;MYH10;CAP2;NANOS1;FARP1;FZD3;NEBL;PDE4DIP;PRKCA;GNG12;MLF1;B3GALTL;ENAH;TIAM1;ALDH5A1;NFIA;NFIB;PSAT1;CDC42EP4;CD109;RRAGD;CD24;IL17D;STEAP2;KCTD15;CD44;PFN2
CDX2_19796622_ChIP-Seq_MESCs_Mouse	0.00287582	SCARA3;CDH2;DAAM1;SDC2;HSPB8;SPARCL1;PDE4DIP;ADCY8;SOX6;PAM;MYH10;FGF2
SUZ12_18692474_ChIP-Seq_MEFs_Mouse	0.00341531	CTNND2;AEBP1;ADCY8;CLU;FGF2;EDNRB;CDH2;SLC16A9;SOX9;SOX6;JAM2;MFAP3L;NTRK2;FZD3;SOX11;PRKCA;MLF1;AR;MRAS;CACNB4;NRG3;NFIA;NFIB;ID4;PAM
CTBP1_25329375_ChIP-Seq_LNCAP_Human	0.00378784	ACSS3;CTNND2;FMN2;ARHGAP5;ADCY8;GRAMD3;CLU;SOX2;CDH2;ZNHIT6;SOX9;TMEM38B;SOX6;JAM2;NEBL;EYA2;TIAM1;RCN1;NRG3;DAAM1;DOK5;NFIB;CDH10;CNTN1;PFN2
FOXO3_23340844_ChIP-Seq_DLD1_Human	0.00410524	RFTN2;IL33;RBM17;RALBP1;SCARA3;AHNAK;LMO3;GOLIM4;XIAP;FMN2;ARHGAP32;TIAM1;ABLIM1;CDC42EP4;DPYSL3;TXNIP;ITGB8;RABL5
AR_25329375_ChIP-Seq_VCAP_Human	0.00540778	ACSS3;CTNND2;FAM13A;PLOD2;FMN2;FRY;ARHGAP5;GRAMD3;AGPAT3;HERC5;ZMAT3;RNF19A;NBN;SOX9;SOX6;NTRK2;FARP1;NEBL;EYA2;LMO3;GFPT2;LIFR;SOX11;SULF1;ALDH5A1;NRG3;NFIA;DAAM1;MDFIC;PSAT1;DOK5;SPARCL1;GPD1L;BMPR1B;PFN2
NFE2L2_20460467_ChIP-Seq_MEFs_Mouse	0.00613096	IL33;SYNPO2;EPHX1;GOLIM4;GLIS3;LIFR;MAT2B;ARHGAP5;ADD3;ADCY8;SULF1;PRDX6;ENAH;PDLIM3;EDNRB;CDH2;MDFIC;CNTN1;SLC16A9;PAM;CAP2;MEGF9;BMPR1A
NRF2_20460467_ChIP-Seq_MEFs_Mouse	0.00613096	IL33;SYNPO2;EPHX1;GOLIM4;GLIS3;LIFR;MAT2B;ARHGAP5;ADD3;ADCY8;SULF1;PRDX6;ENAH;PDLIM3;EDNRB;CDH2;MDFIC;CNTN1;SLC16A9;PAM;CAP2;MEGF9;BMPR1A
RING1B_27294783_Chip-Seq_ESCs_Mouse	0.00613096	UXS1;CTNND2;FMN2;NR3C2;EDNRB;CDH2;NNT;SPOCK2;RAB23;BOC;STOM;BAALC;SLC16A9;SOX9;SOX6;IL33;FARP1;FZD3;SOX11;PRDX6;GFAP;DAK;ENAH;RSPH1;MRAS;NRG3;NFIA;CDH10;CDC42EP4;RRAGD;CNTN1;ID4;SPARCL1;NAT8L;IL17D;PAM
TAL1_26923725_Chip-Seq_HEMANGIOBLAST_Mouse	0.00641192	NOTCH2;FMN2;FRY;ADCY8;GRAMD3;PCDH18;RYR3;PDLIM3;CDH2;DPYSL3;BAALC;TMEM38B;SOX6;MTA3;SMAD2;PDE4DIP;LIFR;PYGO1;TIAM1;DOK5;NFIB;CDC42EP4;CD109;KIT;ID4;CD44;GPR125;MDM1
MITF_21258399_ChIP-Seq_MELANOMA_Human	0.00647591	AHCYL1;ANKRD35;UXS1;CTNND2;FAM13A;GOLIM4;MSI2;FMN2;FRY;AQP1;NR3C2;HERC5;EDNRB;NNT;ITGB8;BAALC;NBN;DIRC2;SOX6;TMEM38B;KPNA3;RBM17;DENND2A;PRKCA;SIRT1;ENAH;TIAM1;IQCK;FAM173B;DAAM1;NRG3;CD109;KIT;RRAGD;SIDT1;TXNIP;NAT8L;GPR125;CD44;PFN2;YAP1;GPM6A;SDC4;AHNAK;SYNPO2;AK1;GMPR;AEBP1;ADD3;AGPAT3;ABLIM1;ZMAT3;PCBP1;SPOCK2;STOM;MTA3;MYH10;CAP2;MFAP3L;KLHDC2;RFTN2;LGI1;NTRK2;FARP1;EYA2;PDE4DIP;LYSMD4;GNG1…
DMRT1_23473982_ChIP-Seq_TESTES_Mouse	0.0105915	YAP1;NOTCH2;SDC4;AHNAK;UXS1;HSPB8;GMPR;PLOD2;AK4;MSI2;ARHGAP5;TOB1;EHBP1;AGPAT3;ABLIM1;CDH2;SPIN1;SOX6;MYH10;NTRK2;FARP1;SMAD1;SULF1;SIRT1;ENAH;ARHGAP32;NFIA;NFIB;KIT;EHBP1L1;ID4;CPE;GPD1L;RIN1;MDM1;PFN2
TOP2B_26459242_ChIP-Seq_MCF-7_Human	0.0109052	ACSS3;CTNND2;HSPB8;GLIS3;PLOD2;MAT2B;FRY;ARHGAP5;GRAMD3;EHBP1;SOX2;TP53BP2;SPIN1;FBXO8;TMEM38B;NTRK2;SCARA3;LMO3;SOX11;SULF1;PRDX6;B3GALTL;ENAH;AR;RSPH1;IQCK;PLCXD3;MDFIC;PSAT1;DOK5;CD109;ID4;FBXL4;GPR125;MDM1
SUZ12_18974828_ChIP-Seq_MESCs_Mouse	0.0116879	SLC22A4;PON2;CTNND2;GLIS3;PLOD2;AEBP1;ADCY8;FGF2;PCDH18;EDNRB;CDH2;BOC;ITGB8;SLC16A9;SOX9;SOX6;NTRK2;FARP1;SCARA3;NEBL;PDE4DIP;SOX11;B3GALTL;AR;CACNB4;NRG3;NFIA;NFIB;DOK5;SIDT1;ID4;NAT8L;CD44;MEGF9
YAP1_20516196_ChIP-Seq_MESCs_Mouse	0.0116879	CTNND2;FHL1;GOLIM4;GLIS3;GMPR;MSI2;FMN2;ADD3;GRAMD3;TOB1;PCDH18;NR3C2;AQP1;CDH2;PCBP1;DPYSL3;SPIN1;SOX9;KPNA3;MYH10;NANOS1;NTRK2;FARP1;SPNS3;PRKCA;SULF1;GNG12;B3GALTL;NFIA;NFIB;CDH10;CD109;KIT;ID4;CPE;SPARCL1;BMPR1B;FBXL4;MEGF9
NR3C1_21868756_ChIP-Seq_MCF10A_Human	0.0132657	NTRK2;GPM6A;NEBL;PON2;FAM13A;MSI2;FRY;ADCY8;GRAMD3;AGPAT3;MLF1;RYR3;NR3C2;AQP1;EDNRB;NFIB;PSAT1;ZMAT3;CD109;KIT;TP53BP2;EZR;BMPR1B
POU5F1_18347094_ChIP-ChIP_MESCs_Mouse	0.0132657	FHL1;AEBP1;MAT2B;ARHGAP5;GRAMD3;SOX2;NNT;RAB23;PCBP1;TSPAN6;SPIN1;ITGB8;STK38L;GPC4;SOX9;SOX6;MTA3;JAM2;NTRK2;RBM17;PRKCA;SOX11;ATP1B2;ENAH;IQCK;RCN1;CACNB4;NFIA;MDFIC;NFIB;CD109;KIT;BMPR1B;IL17D;STEAP2;MDM1
SMARCD1_25818293_ChIP-Seq_ESCs_Mouse	0.0138093	GPM6A;AHCYL1;AHNAK;PON2;AK1;PLOD2;MSI2;ADCY8;GRAMD3;EHBP1;AGPAT3;ABLIM1;EDNRB;CDH2;DPYSL3;STK38L;FBXO8;DIRC2;SOX6;MYH10;CAP2;MFAP3L;FARP1;FZD3;PDE4DIP;B3GALTL;TIAM1;CACNB4;NRG3;DAAM1;NFIB;CDH10;CPE;EFHC2;CD44;MEGF9
SMARCA4_23332759_ChIP-Seq_OLIGODENDROCYTES_Mouse	0.0138093	NOTCH2;ACSS3;SYNPO2;PON2;FAM13A;GOLIM4;ARHGAP5;ADD3;GRAMD3;SOX2;TMEM123;EDNRB;CDH2;DPYSL3;ITGB8;BAALC;NBN;TMEM38B;DIRC2;SOX6;JAM2;NTRK2;IL33;FARP1;EYA2;PRKCA;LIFR;SOX11;TIAM1;NFIA;FAM173B;DAAM1;NFIB;PSAT1;CDH10;CNTN1;ID4;CPE;EZR;CD200;MDM1
TCF4_23295773_ChIP-Seq_U87_Human	0.016493	CTNND2;FAM13A;MSI2;RYR3;NR3C2;EDNRB;CDH2;NNT;BOC;SLC16A9;SOX6;TMEM38B;SCARA3;SPNS3;PRKCA;SOX11;TIAM1;AR;IQCK;CCDC80;CACNB4;DAAM1;MDFIC;NRG3;DOK5;CDH10;CDC42EP4;RABL3;SIDT1;AIDA;EZR;GPR125;RABL5;NOTCH2;GPM6A;GLIS3;GRAMD3;ADD3;EHBP1;ABLIM1;RAB23;FARP1;SMAD1;FZD3;NEBL;EYA2;SULF1;GNG12;PLCXD3;PSAT1;CPE;GPD1L;BMPR1B;PAM;MEGF9;BMPR1A
TAL1_26923725_Chip-Seq_HPCs_Mouse	0.0180934	GPM6A;FAM13A;GOLIM4;PLOD2;MAT2B;FMN2;GRAMD3;PCDH18;EHBP1;PCBP1;RNF19A;FBXO8;MFAP3L;SMAD1;PRKCA;LIFR;SOX11;SULF1;MLF1;TIAM1;AR;NRG3;FAM173B;DAAM1;CDH10;CD109;KIT;CNTN1;CPE;BMPR1B;FBXL4;CD200;CD44;BMPR1A
SOX9_26525672_Chip-Seq_HEART_Mouse	0.0200388	NOTCH2;CTNND2;MSI2;MAT2B;ADD3;PCDH18;GLIS2;ABLIM1;BOC;MYH10;NANOS1;RFTN2;NTRK2;FARP1;NEBL;SOX11;SULF1;CCDC80;NFIA;FAM173B;DAAM1;NFIB;DOK5;CDH10;CNTN1;ID4;TXNIP;PAM;CD44;GPR125
TCF3/E2A_22897851_ChIP-Seq_JUKARTE6-1_Human	0.0210326	SDC2;FAM13A;MAT2B;FMN2;ADD3;ADCY8;GRAMD3;AGPAT3;NR3C2;ABLIM1;CDH2;ZMAT3;RAB23;TP53BP2;ITGB8;SLC16A9;GPC4;SOX9;TMEM38B;KPNA3;CAP2;NTRK2;LMO3;SPNS3;EPHX1;SIRT1;DAK;TIAM1;RCN1;CCDC80;NFIA;CD44;MDM1
STAT3_24763339_ChIP-Seq_IMN-ESCs_Mouse	0.0210326	ANKRD35;GMPR;MSI2;TOB1;SOX2;PDLIM3;CDH2;SPIN1;SLC16A9;SOX6;SMAD2;FARP1;FZD3;NEBL;LMO3;GFPT2;PRKCA;LIFR;PYGO1;AR;ARHGAP32;NFIA;DAAM1;MDFIC;NFIB;SIDT1;ID4;KCTD15;GPR125;MEGF9;MDM1
BACH1_22875853_ChIP-PCR_HELA_AND_SCP4_Human	0.0251168	AHNAK;SYNPO2;SDC2;CTNND2;FHL1;ZNF45;CLU;FGF2;RYR3;EDNRB;JAM2;NTRK2;EYA2;DENND2A;NAP1L3;PDE4DIP;SOX11;PRKCA;ENAH;CLEC4A;AR;CNTN1;TXNIP;CPE;CD44
WT1_20215353_ChIP-ChIP_NEPHRON_PROGENITOR_Mouse	0.0261564	YAP1;HSPB8;MSI2;AEBP1;MAT2B;ADD3;TOB1;EHBP1;AGPAT3;SOX2;CDH2;ZMAT3;BOC;SPIN1;GPC4;NANOS1;SOX11;GNG12;PYGO1;ENAH;AR;RCN1;NFIA;DPY19L3;NFIB;CRK;KCTD15;MEGF9;PFN2
LMO2_26923725_Chip-Seq_HEMANGIOBLAST_Mouse	0.0263547	NOTCH2;HSPB8;MSI2;FMN2;FRY;GRAMD3;RYR3;ABLIM1;PDLIM3;CDH2;PCBP1;DPYSL3;TMEM38B;SOX6;MTA3;SMAD2;LIFR;SOX11;PYGO1;TIAM1;AR;NFIA;NFIB;PSAT1;DOK5;CD109;KIT;ID4;KCTD15;CD44;MDM1
RCOR2_21632747_ChIP-Seq_MESCs_Mouse	0.0265666	B3GALTL;PCBP1;HSPB8;RRAGD;SIDT1;PDE4DIP;SULF1;ARHGAP5;EZR;KCTD15;MDM1
RUNX1_17652178_ChIP-ChIP_JURKAT_Human	0.0280791	NANOS1;ANKRD35;MAT2B;AEBP1;ADD3;GNG12;NR3C2;HERC5;TIAM1;PDLIM3;ABLIM1;DOK5;NNT;CDH10;TP53BP2;STK38L;EFHC2;FBXO8;MTA3;STEAP2
SMAD3_21741376_ChIP-Seq_ESCs_Human	0.0293075	ACSS3;AHNAK;GMPR;PBXIP1;MSI2;TOB1;AGPAT3;RYR3;GLIS2;ZMAT3;DPYSL3;TP53BP2;SLC16A9;GPC4;SOX9;SMAD2;RALBP1;SOX11;OCRL;PRDX6;MLF1;TIAM1;RSPH1;NFIA;FAM173B;MDFIC;DOK5;SIDT1;CNTN1;ID4;EZR;FBXL4;MEGF9
ZFP57_27257070_Chip-Seq_ESCs_Mouse	0.0312606	NANOS1;SMAD2;GPM6A;SYNPO2;CTNND2;PLOD2;MAT2B;FMN2;GRAMD3;NRG3;NFIA;CDH2;MDFIC;NFIB;DPYSL3;KIT;FBXO8;TMEM38B;SOX6;BMPR1B;MEGF9
RNF2_27304074_Chip-Seq_ESCs_Mouse	0.0322914	SLC22A4;CTNND2;GOLIM4;ADCY8;TOB1;PCDH18;SOX2;CDH2;SPOCK2;BOC;SOX9;SOX6;SMAD2;NTRK2;RBM17;FZD3;SOX11;ATP1B2;NFIA;MDFIC;NFIB;KIT;ID4;NAT8L;BMPR1B;KCTD15
TP53_18474530_ChIP-ChIP_U2OS_Human	0.0397	NANOS1;NTRK2;SDC4;EYA2;GOLIM4;GMPR;LIFR;FRY;TOB1;FGF2;RYR3;PDLIM3;PSAT1;ZMAT3;CD109;NBN;CD200
PPARG_20887899_ChIP-Seq_3T3-L1_Mouse	0.0397	AHCYL1;HSPB8;FAM13A;ARHGAP5;FGF2;SOX2;CDH2;RNF19A;BOC;NBN;TMEM38B;KPNA3;DENND2A;SOX11;RCN1;CCDC80;DAAM1;MDFIC;CDC42EP4;CD109;RABL3;NAT8L;RABL5;PFN2;GPM6A;AHNAK;SYNPO2;PON2;GLIS3;GMPR;ADCY8;ADD3;TOB1;PCDH18;AGPAT3;ABLIM1;PCBP1;STK38L;MTA3;MYH10;RFTN2;SMAD2;FARP1;EPHX1;PDE4DIP;B3GALTL;NFIB;PSAT1;ID4;CD200;MEGF9
NANOG_18692474_ChIP-Seq_MESCs_Mouse	0.040234	SDC4;AHNAK;ANKRD35;SDC2;UXS1;KLHL13;GRAMD3;SOX2;ABLIM1;PDLIM3;SPIN1;ITGB8;STK38L;GPC4;MTA3;JAM2;LGI1;NTRK2;RALBP1;LMO3;PDE4DIP;SOX11;ATP1B2;SIRT1;PRDX6;ENAH;IQCK;RCN1;MRAS;MDFIC;NFIB;CDH10;CDC42EP4;KIT;RRAGD;SPARCL1;RIN1;BMPR1B;IL17D;PAM;CRK;STEAP2;KCTD15;MEGF9;MDM1
JUN_21703547_ChIP-Seq_K562_Human	0.0431979	NOTCH2;HSPB8;GLIS3;FMN2;ADD3;ADCY8;NR3C2;AQP1;RAB23;DPYSL3;TP53BP2;STK38L;GPC4;NBN;TMEM38B;JAM2;KLHDC2;NTRK2;FARP1;PRKCA;ENAH;CDH10;CD109;ID4;CPE;EFHC2;CD44
NANOG_18347094_ChIP-ChIP_MESCs_Mouse	0.0431979	ANKRD35;MSI2;MAT2B;GRAMD3;SOX2;TMEM123;ABLIM1;DPYSL3;SPIN1;ITGB8;STK38L;GPC4;SOX6;JAM2;NTRK2;RALBP1;LMO3;PDE4DIP;ENAH;IQCK;RCN1;MRAS;NFIB;CDC42EP4;KIT;RRAGD;SPARCL1;GPD1L;KCTD15;MEGF9;MDM1
GATA1_19941827_ChIP-Seq_MEL_Mouse	0.0431979	SLC22A4;NOTCH2;AHNAK;ANKRD35;GMPR;ADD3;AQP1;TMEM123;ABLIM1;STOM;DIRC2;SOX6;IL33;SMAD1;GFPT2;PDE4DIP;PRKCA;GFAP;TIAM1;IQCK;ALDH5A1;NRG3;NFIA;DAAM1;PSAT1;CDC42EP4;KIT;EHBP1L1;SIDT1;TXNIP
SMAD2/3_21741376_ChIP-Seq_EPCs_Human	0.0431979	YAP1;GMPR;MSI2;KLHL13;FRY;ADCY8;GRAMD3;NR3C2;ZMAT3;SPOCK2;RNF19A;TP53BP2;STK38L;GPC4;SOX9;TMEM38B;MTA3;FARP1;PRPF38A;NEBL;PRKCA;LIFR;SOX11;SULF1;MLF1;PLCXD3;NRG3;NFIB;BMPR1B;KCTD15;GPR125;PFN2
CJUN_26792858_Chip-Seq_BT549_Human	0.0431979	NOTCH2;ANKRD35;SDC2;FAM13A;FHL1;GLIS3;XIAP;PLOD2;CLU;PCDH18;EHBP1;RYR3;RAB23;ITGB8;NBN;SOX9;NANOS1;LGI1;SCARA3;EYA2;AKR1C2;SOX11;GNG12;PYGO1;ENAH;CCDC80;MRAS;NFIB;CD109;TXNIP;SPARCL1;CD44
FOXA1_21572438_ChIP-Seq_LNCaP_Human	0.0431979	SDC4;ANKRD35;PON2;CTNND2;FAM13A;MAT2B;FGF2;EHBP1;TMEM123;PCBP1;TSPAN6;RNF19A;BOC;SLC16A9;MYH10;MFAP3L;SMAD2;LGI1;RALBP1;AKR1C2;SIRT1;AR;ALDH5A1;MRAS;MDFIC;NFIB;KIT;RRAGD;SIDT1;SERPING1;BMPR1B;CD44
KLF5_20875108_ChIP-Seq_MESCs_Mouse	0.0431979	YAP1;CAB39L;SYNPO2;PLOD2;FRY;GRAMD3;FGF2;NR3C2;TMEM123;ABLIM1;CDH2;PCBP1;SPIN1;ITGB8;SLC16A9;SOX6;KPNA3;NANOS1;FARP1;PRPF38A;LMO3;PRKCA;SOX11;ATP1B2;SIRT1;CACNB4;MDFIC;SERPING1;IL17D;PAM;KCTD15;CD44
TBX20_22080862_ChIP-Seq_HEART_Mouse	0.0431979	SDC2;AK1;GMPR;MAT2B;ADCY8;HERC5;TMEM123;ABLIM1;CDH2;NNT;RNF19A;BOC;STOM;ITGB8;TMEM38B;SOX6;SMAD2;IL33;NEBL;EPHX1;PRKCA;LIFR;MLF1;ARHGAP32;RSPH1;CCDC80;NFIB;DOK5;KIT;NAT8L;BMPR1B;KCTD15
TBX20_22328084_ChIP-Seq_HEART_Mouse	0.0431979	SDC2;AK1;GMPR;MAT2B;ADCY8;HERC5;TMEM123;ABLIM1;CDH2;NNT;RNF19A;BOC;STOM;ITGB8;TMEM38B;SOX6;SMAD2;IL33;NEBL;EPHX1;PRKCA;LIFR;MLF1;ARHGAP32;RSPH1;CCDC80;NFIB;DOK5;KIT;NAT8L;BMPR1B;KCTD15
SOX2_21211035_ChIP-Seq_LN229_Gbm	0.0431979	AHCYL1;CTNND2;PLOD2;MSI2;FMN2;FRY;ARHGAP5;RYR3;NR3C2;CDH2;NNT;BOC;SOX9;FBXO8;SOX6;TMEM38B;LMO3;PRKCA;SOX11;ENAH;RCN1;CACNB4;DAAM1;NRG3;DOK5;CDH10;CDC42EP4;CD109;KIT;EFHC2;CD44;AHNAK;SYNPO2;MAT2B;TOB1;PCDH18;TP53BP2;CAP2;NTRK2;SMAD1;PRPF38A;EYA2;PDE4DIP;GNG12;NFIB;PSAT1;BMPR1B;PAM;MDM1
NANOG_16153702_ChIP-ChIP_HESCs_Human	0.0449514	YAP1;SDC4;UXS1;KLHL13;MAT2B;ADD3;FGF2;EHBP1;RYR3;NR3C2;SOX2;CDH2;PCBP1;DPYSL3;GPC4;DIRC2;KPNA3;LGI1;NEBL;LMO3;SULF1;GNG12;TIAM1;NFIA;CDC42EP4;RABL3;STEAP2;KCTD15
ERA_27197147_Chip-Seq_ENDOMETRIOID-ADENOCARCINOMA_Human	0.0453381	NOTCH2;SLC22A4;AHCYL1;EYA2;HSPB8;GMPR;SOX11;MSI2;FRY;TOB1;NR3C2;B3GALTL;PDLIM3;DAAM1;NFIA;RNF19A;GPD1L;KCTD15;CD44;MFAP3L
EP300_21415370_ChIP-Seq_HL-1_Mouse	0.0521062	SCARA3;AHNAK;GFPT2;GMPR;LIFR;ADD3;GRAMD3;GNG12;B3GALTL;PDLIM3;ABLIM1;DAAM1;CDH2;MDFIC;NFIB;DPYSL3;PAM;MYH10;CAP2
PPARG_20176806_ChIP-Seq_3T3-L1_Mouse	0.0592077	SLC22A4;NOTCH2;FAM13A;GLIS3;ATP1A2;NR3C2;AQP1;ABLIM1;PDLIM3;EDNRB;PCBP1;RNF19A;FBXO8;MTA3;MYH10;SMAD2;SCARA3;EYA2;DENND2A;SULF1;AR;NRG3;NFIA;DAAM1;NFIB;PSAT1;ID4;TXNIP;PFN2
TCF3_18347094_ChIP-ChIP_MESCs_Mouse	0.0602444	SDC4;HSPB8;AEBP1;GRAMD3;SOX2;ABLIM1;SPIN1;ITGB8;STK38L;SLC16A9;GPC4;SOX6;MTA3;JAM2;FARP1;LMO3;GFPT2;PDE4DIP;PRKCA;SOX11;OCRL;SULF1;ENAH;IQCK;RCN1;MDFIC;NFIB;CDC42EP4;KIT;RRAGD;SPARCL1;BMPR1B;MEGF9;MDM1
SMAD4_19686287_ChIP-ChIP_HaCaT_Human	0.0605868	B3GALTL;ENAH;SMAD1;ABLIM1;MDFIC;CDC42EP4;TP53BP2;AKR1C2;GNG12;EHBP1
ESR1_22446102_ChIP-Seq_UTERUS_Mouse	0.0688331	AHNAK;GLIS3;AEBP1;ADD3;GRAMD3;TOB1;FGF2;RYR3;ABLIM1;EDNRB;DPYSL3;MYH10;CAP2;IL33;FARP1;SMAD1;EYA2;DENND2A;PRKCA;LIFR;SOX11;B3GALTL;ENAH;AR;RCN1;CCDC80;MDFIC;ID4;IL17D;MEGF9
KDM2B_26808549_Chip-Seq_JURKAT_Human	0.0688331	YAP1;AHNAK;MSI2;ADD3;TOB1;CLU;AGPAT3;NR3C2;GLIS2;TMEM123;ABLIM1;CDH2;RNF19A;KPNA3;MYH10;NANOS1;FARP1;RBM17;EPHX1;PDE4DIP;PRKCA;SOX11;PYGO1;ENAH;NFIA;NFIB;EHBP1L1;RRAGD;AIDA;IL17D;BMPR1A
RING1B_27294783_Chip-Seq_NPCs_Mouse	0.0688331	GOLIM4;GLIS3;GMPR;MSI2;FMN2;ADD3;ADCY8;EHBP1;GLIS2;SOX2;CDH2;RAB23;PCBP1;SOX9;SOX6;MYH10;LGI1;LIFR;SOX11;ATP1B2;SIRT1;PRDX6;ENAH;TIAM1;NRG3;NFIA;FAM173B;NFIB;ID4;SPARCL1;GPR125
SUZ12_18555785_ChIP-Seq_MESCs_Mouse	0.0734192	CTNND2;GLIS3;ADCY8;GNG12;PCDH18;AR;PLCXD3;CACNB4;EDNRB;NFIA;SPOCK2;BOC;ID4;SIDT1;SLC16A9;SOX9;CD44;CAP2;MFAP3L
FOXM1_26100407_CHIP-SEQ_Hek293_flp-in_Human	0.075137	SLC22A4;AHCYL1;GOLIM4;MSI2;FMN2;ARHGAP5;ADD3;GRAMD3;PCDH18;NR3C2;CDH2;PCBP1;TP53BP2;SOX9;CAP2;RBM17;PDE4DIP;PRKCA;SIRT1;ENAH;TIAM1;ARHGAP32;NFIA;DPY19L3;MDFIC;NFIB;CD109;TXNIP;EZR;CRK
TAL1_20566737_ChIP-Seq_PRIMARY_FETAL_LIVER_ERYTHROID_Mouse	0.0870407	NOTCH2;AHNAK;FHL1;GMPR;ATP1A2;MSI2;ADD3;TOB1;FGF2;AQP1;NNT;RNF19A;STK38L;GPC4;SOX6;MTA3;KLHDC2;PRKCA;PRDX6;GFAP;CCDC80;NFIA;DAAM1;CDC42EP4;KIT;TXNIP;CD44;BMPR1A;MDM1
ASH2L_23239880_ChIP-Seq_MESCs_Mouse	0.0902146	NOTCH2;ANKRD35;HSPB8;GLIS3;PBXIP1;MAT2B;GRAMD3;FRY;ARHGAP5;TOB1;SOX2;TMEM47;ABLIM1;EDNRB;RNF19A;ZNHIT6;DPYSL3;SPIN1;GPC4;FBXO8;TMEM38B;MTA3;JAM2;RBM17;NTRK2;PRPF38A;GFPT2;SPNS3;PDE4DIP;LIFR;SULF1;PRDX6;PYGO1;ENAH;TIAM1;ARHGAP32;IQCK;RCN1;NFIB;DOK5;CDC42EP4;KIT;ID4;SPARCL1;GPR125;MDM1
CEBPD_23245923_ChIP-Seq_MEFs_Mouse	0.090661	IL33;PDLIM3;NFIA;NFIB;CTNND2;SDC2;LYSMD4;GRAMD3;BMPR1B;PCDH18;MLF1
NUCKS1_24931609_ChIP-Seq_HEPATOCYTES_Mouse	0.101719	YAP1;SMAD2;SMAD1;CDH2;MDFIC;CPE;PRKCA;NBN;FBXO8;SIRT1;CLU;CRK
ARNT_22903824_ChIP-Seq_MCF-7_Human	0.101719	EYA2;GMPR;XIAP;MSI2;KLHL13;FMN2;ARHGAP5;GNG12;PCDH18;AR;TMEM123;DOK5;PSAT1;NNT;ID4;SIDT1;SOX6;BMPR1B
PPAR_26484153_Chip-Seq_NCI-H1993_Human	0.101719	RFTN2;AHCYL1;SDC4;SPNS3;FHL1;PDE4DIP;PLOD2;GRAMD3;PRDX6;NFIB;SPOCK2;CDC42EP4;CD109;SPIN1;STK38L;GPD1L;SOX9;SOX6;BMPR1B;MTA3
NANOG_18692474_ChIP-Seq_MEFs_Mouse	0.101719	SDC4;AHNAK;SDC2;UXS1;KLHL13;SOX2;PDLIM3;SPIN1;GPC4;JAM2;LGI1;NTRK2;RALBP1;SOX11;ATP1B2;PRDX6;ENAH;RCN1;MRAS;MDFIC;NFIB;CDC42EP4;KIT;RRAGD;SPARCL1;BMPR1B;PAM;CRK;STEAP2;MDM1
OCT4_18692474_ChIP-Seq_MEFs_Mouse	0.101719	SDC4;AHNAK;AK1;KLHL13;AGPAT3;SOX2;PDLIM3;NNT;RAB23;SPIN1;GPC4;KPNA3;JAM2;NTRK2;RALBP1;FZD3;EPHX1;SOX11;ATP1B2;PRDX6;ENAH;CACNB4;NFIA;NFIB;KIT;RRAGD;TXNIP;SPARCL1;BMPR1A;MDM1
SMRT_27268052_Chip-Seq_Bcells_Human	0.101719	CAB39L;PON2;FAM13A;GMPR;MSI2;ADD3;AGPAT3;ABLIM1;PDLIM3;ZMAT3;PCBP1;RNF19A;BOC;ITGB8;BAALC;KPNA3;KLHDC2;FARP1;RBM17;SMAD1;PRPF38A;EYA2;OCRL;PRDX6;MLF1;CDC42EP4;RRAGD;SIDT1;CNTN1;EZR
ZFP281_27345836_Chip-Seq_ESCs_Mouse	0.101719	NOTCH2;AHNAK;GLIS3;MSI2;MAT2B;FMN2;TOB1;EHBP1;AGPAT3;GLIS2;NNT;SLC16A9;GPC4;SOX9;MYH10;MFAP3L;EYA2;PRKCA;SOX11;PRDX6;TMEM231;ENAH;NFIB;CDH10;CDC42EP4;RRAGD;CNTN1;GPD1L;RIN1;PFN2
KLF4_26769127_Chip-Seq_PDAC-Cell_line_Human	0.101719	YAP1;ANKRD35;HSPB8;PBXIP1;MSI2;ARHGAP5;ADD3;TMEM123;CDH2;SPOCK2;PCBP1;NBN;SOX9;KLHDC2;NANOS1;EPHX1;PDE4DIP;PRKCA;GNG12;SIRT1;PRDX6;ENAH;NFIA;EHBP1L1;TXNIP;RIN1;EZR;GPR125;BMPR1A;PFN2
GATA3_24758297_ChIP-Seq_MCF-7_Human	0.101719	ACSS3;SDC4;AHNAK;ANKRD35;XIAP;PLOD2;MSI2;FMN2;CLU;SOX2;BAALC;NBN;SOX9;MTA3;CAP2;PDE4DIP;PRDX6;ENAH;ARHGAP32;PLCXD3;DAAM1;NFIB;CDC42EP4;CD109;SIDT1;TXNIP;ZNF853;GPD1L;FBXL4;KCTD15
EP300_20729851_ChIP-Seq_FORBRAIN_MIDBRAIN_LIMB_HEART_Mouse	0.106575	YAP1;AHNAK;CTNND2;AK1;GLIS3;GMPR;ATP1A2;MSI2;EHBP1;RYR3;GLIS2;TMEM47;SOX2;ABLIM1;DPYSL3;SPIN1;ITGB8;SOX9;SOX6;MYH10;FZD3;PRKCA;SOX11;SULF1;NFIA;DAAM1;NFIB;RRAGD;SPARCL1;BMPR1B;PAM
TFAP2C_20629094_ChIP-Seq_MCF-7_Human	0.112194	NOTCH2;SLC22A4;NTRK2;RASL12;EYA2;CTNND2;GMPR;PRKCA;SULF1;GRAMD3;EHBP1;TIAM1;PLCXD3;NFIB;CDC42EP4;SIDT1;STOM;BAALC;GPD1L;CAP2
CTBP2_25329375_ChIP-Seq_LNCAP_Human	0.115891	ACSS3;AKR1C2;PLOD2;ATP1A2;ADCY8;RYR3;ENAH;SOX2;NRG3;CDH2;DOK5;CDH10;ID4;SPIN1;SOX9;SOX6;KCTD15;CAP2
RNF2_27304074_Chip-Seq_NSC_Mouse	0.115891	RBM17;GPM6A;FHL1;PLOD2;SOX11;LIFR;MAT2B;TMEM47;MDFIC;NNT;RAB23;CDH10;EFHC2;FBXO8;NAT8L;PAM;KCTD15;BMPR1A
P53_22127205_ChIP-Seq_FIBROBLAST_Human	0.117898	IL33;CAB39L;MAT2B;TMEM47;RCN1;RSPH1;MDFIC;NNT;RRAGD;SOX9;GPC4;MTA3;CRK
SMAD3_21741376_ChIP-Seq_HESCs_Human	0.122628	SMAD2;LGI1;ACSS3;AHNAK;NEBL;EYA2;GFPT2;HSPB8;LIFR;MAT2B;FMN2;FRY;AGPAT3;RYR3;NRG3;DAAM1;DOK5;RNF19A;STK38L;CPE;GPC4;DIRC2;MEGF9
CTNNB1_20460455_ChIP-Seq_HCT116_Human	0.125197	YAP1;FAM13A;PDE4DIP;PRKCA;MSI2;ADCY8;SULF1;EHBP1;ENAH;ABLIM1;NFIB;RNF19A;STOM;CPE;BMPR1B;PAM;CAP2
SOX9_26525672_Chip-Seq_Limbbuds_Mouse	0.13073	RFTN2;GFPT2;SOX11;PRKCA;ATP1A2;MSI2;MAT2B;FMN2;ARHGAP5;SULF1;PRDX6;EHBP1;ENAH;SPOCK2;CDC42EP4;RAB23;ITGB8;SOX9;PAM;MYH10
FOXO1_23066095_ChIP-Seq_LIVER_Mouse	0.139479	NFIA;LIFR;GPD1L;SOX6;GRAMD3;ARHGAP5;TOB1;NR3C2
TEAD4_26923725_Chip-Seq_HEMANGIOBLAST_Mouse	0.139479	SOX2;LGI1;IL33;TIAM1;CDH2;CTNND2;DENND2A;MSI2;SOX9;GRAMD3;FRY
POU5F1_26923725_Chip-Seq_MESODERM_Mouse	0.139479	SOX2;LGI1;IL33;TIAM1;CDH2;CTNND2;DENND2A;MSI2;SOX9;GRAMD3;FRY
EWS_26573619_Chip-Seq_HEK293_Human	0.139479	GOLIM4;NAP1L3;LYSMD4;MAT2B;GRAMD3;PCDH18;EHBP1;NR3C2;CACNB4;RNF19A;ID4;SOX9;CD200;PFN2;MEGF9
EOMES_21245162_ChIP-Seq_HESCs_Human	0.139479	RASL12;SCARA3;PRPF38A;AHNAK;PLOD2;LYSMD4;OCRL;FMN2;ATP1B2;TOB1;TMEM123;ABLIM1;CCDC80;DAAM1;TP53BP2;STOM
SPI1_20517297_ChIP-Seq_HL60_Human	0.139479	SMAD2;IL33;RALBP1;PRPF38A;AHNAK;HSPB8;DENND2A;GMPR;PBXIP1;PRKCA;PDLIM3;RSPH1;IQCK;EDNRB;FAM173B;ZMAT3;STOM;FBXO8;EZR;MEGF9
SOX2_18692474_ChIP-Seq_MEFs_Mouse	0.139479	SDC4;AHNAK;UXS1;KLHL13;AGPAT3;SOX2;NNT;SPIN1;GPC4;JAM2;RALBP1;FZD3;EYA2;GFPT2;SOX11;PRDX6;ENAH;RCN1;MRAS;CACNB4;NFIB;KIT;RRAGD;TXNIP;CPE;BMPR1B;STEAP2;BMPR1A;MDM1
TCF4_22108803_ChIP-Seq_LS180_Human	0.139479	ACSS3;UXS1;CTNND2;GOLIM4;MSI2;KLHL13;ADD3;AGPAT3;NR3C2;TMEM123;ZMAT3;STK38L;SOX9;MTA3;IL33;FZD3;EYA2;LIFR;LYSMD4;TIAM1;ARHGAP32;NFIB;DOK5;CDH10;ID4;NAT8L;CRK;CD44;MDM1
GATA6_25053715_ChIP-Seq_YYC3_Human	0.139479	YAP1;NOTCH2;SDC4;AHNAK;ARHGAP5;TOB1;EHBP1;TMEM123;ZNHIT6;PCBP1;TP53BP2;ITGB8;SOX9;KLHDC2;IL33;RBM17;NEBL;PDE4DIP;PRKCA;OCRL;PRDX6;RCN1;DPY19L3;DAAM1;CDC42EP4;EHBP1L1;AIDA;CRK;BMPR1A
KDM2B_26808549_Chip-Seq_SUP-B15_Human	0.139479	NOTCH2;AHCYL1;AHNAK;SDC2;AK1;GMPR;MSI2;TOB1;AGPAT3;GLIS2;ABLIM1;SPOCK2;RNF19A;TP53BP2;KPNA3;MYH10;RBM17;PDE4DIP;GNG12;TMEM231;B3GALTL;ENAH;RSPH1;RCN1;NRG3;NFIB;CDC42EP4;EHBP1L1;KCTD15
NFI_21473784_ChIP-Seq_ESCs_Mouse	0.139479	YAP1;SDC4;CAB39L;PON2;UXS1;PBXIP1;MAT2B;ADD3;PCDH18;AGPAT3;GLIS2;STOM;NBN;IL33;PRPF38A;LIFR;GNG12;B3GALTL;ENAH;ARHGAP32;RCN1;NRG3;NFIA;NFIB;CDH10;SPARCL1;IL17D;FBXL4;CD44
CEBPB_21427703_ChIP-Seq_3T3-L1_Mouse	0.139479	SDC4;AK1;GLIS3;AEBP1;MAT2B;PCDH18;NR3C2;HERC5;NNT;RAB23;ZNHIT6;PCBP1;RNF19A;STOM;ITGB8;TMEM38B;JAM2;FARP1;LIFR;PRDX6;NFIA;NFIB;CDC42EP4;CD109;TXNIP;STEAP2;CD44;MEGF9;PFN2
FOXA1_21915096_ChIP-Seq_LNCaP-1F5_Human	0.139479	YAP1;SDC4;AHNAK;ANKRD35;GOLIM4;FRY;ARHGAP5;ADD3;HERC5;SOX2;TMEM123;PDLIM3;STOM;BAALC;NANOS1;SMAD2;RBM17;SMAD1;PRKCA;LIFR;PRDX6;DAK;ENAH;DAAM1;NFIB;SIDT1;TXNIP;GPD1L;FBXL4
EGR1_20690147_ChIP-Seq_ERYTHROLEUKEMIA_Human	0.154471	AHCYL1;ANKRD35;UXS1;CTNND2;MLC1;MSI2;FMN2;RYR3;AQP1;CDH2;DPYSL3;ITGB8;SLC16A9;NBN;SOX9;KPNA3;NANOS1;RALBP1;SCARA3;DENND2A;PRKCA;LIFR;ATP1B2;SIRT1;ENAH;AR;TIAM1;ALDH5A1;CACNB4;MDFIC;NRG3;DOK5;CDC42EP4;CD109;RIN1;NAT8L;GPR125;KCTD15;SLC22A4;NOTCH2;SDC4;AHNAK;SDC2;AK1;GMPR;PBXIP1;ATP1A2;KLHL13;AEBP1;MAT2B;ADD3;ADCY8;EHBP1;AGPAT3;TMEM123;ZMAT3;PCBP1;RAB23;TP53BP2;JAM2;CAP2;SMAD2;KLHDC2;EPHX1;PDE4DIP;…
MEIS1_26923725_Chip-Seq_HEMOGENIC-ENDOTHELIUM_Mouse	0.161544	GPM6A;FZD3;CTNND2;GMPR;MLC1;PDE4DIP;MAT2B;RYR3;B3GALTL;PYGO1;ARHGAP32;CDH2;PSAT1;CD109;DPYSL3;CPE;FBXO8;MTA3;KCTD15
EWS-ERG_20517297_ChIP-Seq_CADO-ES1_Human	0.1625	IL33;SCARA3;CAB39L;UXS1;SDC2;GMPR;SOX11;KLHL13;MAT2B;FRY;AGPAT3;MLF1;TMEM47;RRAGD;CNTN1;BAALC;AIDA
MYCN_21190229_ChIP-Seq_SHEP-21N_Human	0.175515	CLEC4A;FARP1;FZD3;CACNB4;RABL3;TMEM38B;FRY;JAM2
KLF4_25985364_ChIP-Seq_ATHEROSCLEROSIS_LESION_Mouse	0.175593	SOX11;MAT2B;SULF1;GRAMD3;SIRT1;PCDH18;ARHGAP32;RCN1;EDNRB;NFIA;CDH2;PCBP1;CD109;STOM;CRK;KCTD15;CD200;PFN2;MEGF9
POU5F1_16518401_ChIP-PET_MESCs_Mouse	0.182989	RBM17;EYA2;HSPB8;GLIS3;PRKCA;LIFR;SOX11;ATP1B2;SULF1;TOB1;SIRT1;ENAH;SOX2;TIAM1;NFIB;DOK5;SPOCK2;RRAGD;SLC16A9;BMPR1B;IL17D;PAM;JAM2
EZH2_18974828_ChIP-Seq_MESCs_Mouse	0.182989	NTRK2;NEBL;CTNND2;GLIS3;SOX11;AEBP1;ADCY8;PCDH18;AR;CACNB4;NRG3;NFIA;CDH2;BOC;RRAGD;ID4;SIDT1;SLC16A9;SOX9;NAT8L
RNF2_18974828_ChIP-Seq_MESCs_Mouse	0.182989	NTRK2;NEBL;CTNND2;GLIS3;SOX11;AEBP1;ADCY8;PCDH18;AR;CACNB4;NRG3;NFIA;CDH2;BOC;RRAGD;ID4;SIDT1;SLC16A9;SOX9;NAT8L
TAF15_26573619_Chip-Seq_HEK293_Human	0.186512	CDH2;DENND2A;XIAP;MAT2B;FBXL4;PCDH18
KLF1_20508144_ChIP-Seq_FETAL-LIVER-ERYTHROID_Mouse	0.186512	KLHDC2;NTRK2;NAP1L3;GMPR;XIAP;ADD3;SULF1;TMEM123;CACNB4;RNF19A;ZNHIT6;RRAGD;SIDT1;STOM;SLC16A9;EZR;MTA3;PFN2
UBF1/2_26484160_Chip-Seq_FIBROBLAST_Human	0.196348	ACSS3;AHNAK;GLIS3;PLOD2;ATP1A2;PCDH18;NR3C2;TMEM123;NNT;SOX9;TMEM38B;CAP2;RALBP1;DENND2A;LYSMD4;PRDX6;B3GALTL;CLEC4A;PLCXD3;NFIB;PSAT1;CDC42EP4;KIT;SPARCL1;IL17D;KCTD15;MEGF9;PFN2
GATA3_22897851_ChIP-Seq_JUKARTE6-1_Human	0.196348	ANKRD35;CAB39L;HSPB8;GMPR;ZNF45;ADD3;GRAMD3;HERC5;TMEM123;DPYSL3;SPIN1;KPNA3;MFAP3L;RFTN2;SMAD2;RALBP1;LIFR;PRDX6;RCN1;CACNB4;NFIA;DAAM1;RRAGD;TXNIP;AIDA;FBXL4;MEGF9;PFN2
KLF5_25053715_ChIP-Seq_YYC3_Human	0.196348	SDC4;AHNAK;CTNND2;MAT2B;ARHGAP5;TOB1;PCDH18;GLIS2;SOX2;EDNRB;DPYSL3;BOC;ITGB8;DIRC2;MTA3;MYH10;SMAD1;RALBP1;EYA2;EPHX1;SOX11;ATP1B2;ALDH5A1;MDFIC;PSAT1;CDH10;TXNIP;KCTD15
P300_27268052_Chip-Seq_Bcells_Human	0.196348	AHNAK;ANKRD35;HSPB8;GMPR;AGPAT3;AQP1;ABLIM1;PDLIM3;NNT;TP53BP2;KPNA3;FARP1;RBM17;RALBP1;PRPF38A;EYA2;EPHX1;PRDX6;MLF1;DAK;RSPH1;MRAS;NFIB;EHBP1L1;RRAGD;TXNIP;EZR;RABL5
SOX2_18692474_ChIP-Seq_MESCs_Mouse	0.196348	SDC4;ANKRD35;AHNAK;UXS1;ATP1A2;KLHL13;MAT2B;GRAMD3;AGPAT3;SOX2;NNT;SPIN1;STK38L;ITGB8;GPC4;JAM2;FARP1;RALBP1;FZD3;EYA2;GFPT2;DENND2A;SOX11;SULF1;PRDX6;ENAH;IQCK;RCN1;MRAS;CACNB4;NFIB;CDH10;CD109;KIT;RRAGD;TXNIP;CPE;BMPR1B;IL17D;STEAP2;MEGF9;MDM1;BMPR1A
MNX1_26342078_ChIP-Seq_MIN6-4N_Mouse	0.196348	SLC22A4;UXS1;GOLIM4;GMPR;MSI2;AEBP1;FMN2;FRY;ADCY8;FGF2;SPOCK2;RAB23;BOC;ITGB8;SLC16A9;SOX9;KPNA3;FARP1;RALBP1;SOX11;ATP1B2;SIRT1;PRDX6;SIDT1;SPARCL1;NAT8L;CD200;PFN2
FOXA1_26769127_Chip-Seq_PDAC-Cell_line_Human	0.196348	YAP1;ACSS3;AHCYL1;AHNAK;ANKRD35;HSPB8;MSI2;ARHGAP5;ADD3;NR3C2;TMEM123;ABLIM1;ZNHIT6;NBN;PRPF38A;PDE4DIP;GNG12;SIRT1;PRDX6;DAK;NRG3;EHBP1L1;TXNIP;AIDA;RIN1;CRK;BMPR1A;PFN2
CEBPB_26923725_Chip-Seq_MESODERM_Mouse	0.19683	SMAD2;GLIS3;MAT2B;ADCY8;GRAMD3;MLF1;TMEM47;B3GALTL;AR;TMEM123;CDH2;DOK5;RNF19A;CD109;BOC;RRAGD;KCTD15
PPARD_23176727_ChIP-Seq_KERATINOCYTES_Mouse	0.207389	DPY19L3;KIT;FHL1;PRKCA;AEBP1
WT1_19549856_ChIP-ChIP_CCG9911_Human	0.225185	NOTCH2;SMAD1;ALDH5A1;NEBL;MAT2B
CHD7_19251738_ChIP-ChIP_MESCs_Mouse	0.23854	CDH2;MDFIC;XIAP;STEAP2
GATA2_26923725_Chip-Seq_HEMANGIOBLAST_Mouse	0.257845	GPM6A;NRG3;CTNND2
BRD4_25478319_ChIP-Seq_HGPS_Human	0.257845	YAP1;NOTCH2;SDC4;HSPB8;GLIS3;FMN2;GRAMD3;FGF2;RNF19A;DPYSL3;TP53BP2;SOX9;FARP1;GFPT2;DENND2A;PDE4DIP;PRKCA;SULF1;SIRT1;CCDC80;DAAM1;MDFIC;PSAT1;CDC42EP4;CD109;KIT;ID4;EZR;STEAP2;CD44;PFN2
NFIB_24661679_ChIP-Seq_LUNG_Mouse	0.265823	EYA2;UXS1;BOC;KIT;ID4;AIDA;SULF1;TOB1;CRK;AGPAT3
EWS-FLI1_20517297_ChIP-Seq_SK-N-MC_Human	0.265823	TMEM47;ALDH5A1;NFIA;CTNND2;FAM13A;PRKCA;PRDX6;MLF1;AGPAT3;DAK
TCF3_18467660_ChIP-ChIP_MESCs_Mouse	0.265823	NANOS1;NOTCH2;SMAD2;SMAD1;RALBP1;SOX11;KLHL13;AEBP1;ADCY8;GNG12;SIRT1;TMEM123;RCN1;NFIB;CDC42EP4;RAB23;KIT;STK38L;GPC4;MEGF9
PRDM14_20953172_ChIP-Seq_ESCs_Human	0.265823	NOTCH2;IL33;RALBP1;NEBL;FAM13A;PLOD2;ZNF45;ADD3;FGF2;PRDX6;AGPAT3;NR3C2;DAK;PYGO1;RCN1;EDNRB;NFIA;SPOCK2;RAB23;AIDA;SOX9;SOX6;CD44;MEGF9
TAL1_22897851_ChIP-Seq_JUKARTE6-1_Human	0.265823	NOTCH2;ANKRD35;HSPB8;ZNF45;FGF2;AGPAT3;ABLIM1;RAB23;DPYSL3;KPNA3;KLHDC2;RFTN2;IL33;RBM17;RALBP1;FZD3;SPNS3;EPHX1;OCRL;PRDX6;DAK;B3GALTL;RCN1;DAAM1;RRAGD;AIDA;MEGF9
FLI1_21867929_ChIP-Seq_TH2_Mouse	0.265823	SLC22A4;ACSS3;GMPR;MSI2;MAT2B;ARHGAP5;ADCY8;TOB1;EHBP1;AGPAT3;NNT;SPOCK2;ITGB8;SLC16A9;SOX9;MYH10;CAP2;NTRK2;PRKCA;LIFR;SOX11;SIRT1;DAAM1;CDC42EP4;CNTN1;ID4;MDM1
CDX2_22108803_ChIP-Seq_LS180_Human	0.265823	NOTCH2;HSPB8;GLIS3;FRY;ADD3;GRAMD3;EHBP1;NR3C2;TMEM123;ABLIM1;ZMAT3;RNF19A;TP53BP2;ITGB8;STK38L;KLHDC2;IL33;AKR1C2;PRDX6;MLF1;FAM173B;KIT;SIDT1;EZR;PAM;CD44;MDM1
MYC_19829295_ChIP-Seq_ESCs_Human	0.265823	RASL12;AHNAK;PBXIP1;CLU;RYR3;NR3C2;ZNHIT6;ITGB8;SLC16A9;SOX6;JAM2;KLHDC2;RFTN2;LGI1;IL33;RBM17;PRPF38A;DENND2A;SOX11;MLF1;TMEM231;DAK;B3GALTL;CCDC80;FAM173B;GPD1L;IL17D
TCFCP2L1_18555785_Chip-Seq_ESCs_Mouse	0.265823	SYNPO2;UXS1;GOLIM4;ATP1A2;FMN2;FRY;PCDH18;RYR3;SOX2;RAB23;TMEM38B;SOX6;RBM17;NEBL;EYA2;EPHX1;SULF1;PRDX6;MLF1;ENAH;RCN1;CACNB4;DOK5;BMPR1B;PAM;CD44;PFN2
POU3F1_26484290_ChIP-Seq_ESCss_Mouse	0.265823	PBXIP1;FMN2;ADD3;CLU;GLIS2;SOX2;EDNRB;DPYSL3;ITGB8;KLHDC2;EYA2;LIFR;LYSMD4;PRDX6;MLF1;ENAH;RSPH1;MRAS;NFIA;DAAM1;DOK5;KIT;CNTN1;AIDA;RIN1;PAM;CD44
SOX2_22085726_ChIP-Seq_NPCs_Mouse	0.265823	NOTCH2;ACSS3;AHCYL1;AHNAK;FAM13A;AK1;GLIS3;GMPR;NR3C2;SOX2;KLHDC2;RFTN2;SMAD2;EYA2;LYSMD4;SULF1;PYGO1;ENAH;RCN1;PLCXD3;CACNB4;DOK5;TXNIP;SPARCL1;RABL5;CD200;MEGF9
RUNX2_24764292_ChIP-Seq_MC3T3_Mouse	0.265823	NOTCH2;AHCYL1;SDC4;AHNAK;ANKRD35;UXS1;HSPB8;AEBP1;EHBP1;AGPAT3;AQP1;GLIS2;TMEM123;RAB23;RNF19A;SOX9;SOX6;RALBP1;LIFR;IQCK;CCDC80;NFIA;DAAM1;NFIB;RIN1;CRK;MEGF9
FOXA1_25552417_ChIP-Seq_VCAP_Human	0.265823	ACSS3;AHNAK;FAM13A;PLOD2;TMEM123;NBN;MYH10;SMAD2;IL33;RBM17;SMAD1;RALBP1;NEBL;EYA2;LMO3;SPNS3;PRDX6;DAK;AR;RSPH1;ALDH5A1;DPY19L3;NFIB;ID4;TXNIP;SPARCL1;STEAP2
ELF3_26769127_Chip-Seq_PDAC-Cell_line_Human	0.265823	YAP1;AHCYL1;XIAP;PLOD2;PBXIP1;ADD3;RYR3;TP53BP2;MTA3;KLHDC2;LMO3;EPHX1;PRKCA;LIFR;GNG12;PRDX6;GFAP;ENAH;ARHGAP32;RCN1;NRG3;NFIA;DAAM1;CDC42EP4;EZR;CRK;BMPR1A
SMAD4_21741376_ChIP-Seq_HESCs_Human	0.292341	ACSS3;AHCYL1;AHNAK;HSPB8;MLC1;MAT2B;FMN2;FRY;TOB1;AGPAT3;RYR3;ABLIM1;RNF19A;BOC;STK38L;GPC4;TMEM38B;CAP2;SMAD2;NTRK2;RALBP1;SCARA3;NEBL;EYA2;GFPT2;PDE4DIP;LIFR;RSPH1;NRG3;DAAM1;DOK5;KIT;CPE;CD200;MEGF9
SMAD3_18955504_ChIP-ChIP_HaCaT_Human	0.292341	YAP1;NOTCH2;AHNAK;HSPB8;GOLIM4;PLOD2;TOB1;CLU;ABLIM1;PCBP1;SPIN1;STOM;ITGB8;DIRC2;CAP2;SMAD1;NEBL;AKR1C2;PDE4DIP;GNG12;PRDX6;ENAH;CD109;RIN1;EZR;CD44
SMAD2_18955504_ChIP-ChIP_HaCaT_Human	0.292341	YAP1;NOTCH2;AHNAK;HSPB8;GOLIM4;PLOD2;TOB1;CLU;ABLIM1;PCBP1;SPIN1;STOM;ITGB8;DIRC2;CAP2;SMAD1;NEBL;AKR1C2;PDE4DIP;GNG12;PRDX6;ENAH;CD109;RIN1;EZR;CD44
ETV2_25802403_ChIP-Seq_MESCs_Mouse	0.301628	FZD3;NEBL;UXS1;DENND2A;PBXIP1;PRDX6;NR3C2;PYGO1;TMEM123;RCN1;ALDH5A1;NFIB;TMEM38B;STEAP2;CD44
WDR5_24793694_ChIP-Seq_LNCAP_Human	0.304703	SMAD2;EYA2;EPHX1;TP53BP2;GMPR;PDE4DIP;PLOD2;ZNF853;SOX9;AGPAT3;GLIS2;TMEM231
ESR1_21235772_ChIP-Seq_MCF-7_Human	0.305838	HSPB8;PLOD2;SLC16A9;CD44;CAP2
SALL4_18804426_ChIP-ChIP_XEN_Mouse	0.305838	YAP1;FZD3;SDC4;DENND2A;PDE4DIP;SULF1;PRDX6;EHBP1;ENAH;RCN1;NFIA;NFIB;STK38L;BAALC;PAM
AR_20517297_ChIP-Seq_VCAP_Human	0.314786	RASL12;ANKRD35;CTNND2;CLU;FGF2;AGPAT3;NR3C2;PDLIM3;PCBP1;TSPAN6;BOC;TP53BP2;BAALC;TMEM38B;SOX6;LGI1;EYA2;LIFR;ATP1B2;PYGO1;AR;ARHGAP32;NFIB;EHBP1L1;RRAGD;TXNIP;GPD1L
TCF3_18692474_ChIP-Seq_MESCs_Mouse	0.317022	ANKRD35;LMO3;HSPB8;GRAMD3;PRDX6;AGPAT3;SOX2;RCN1;PDLIM3;NFIB;PSAT1;KIT;RRAGD;SIDT1;SPIN1;STK38L;GPC4;JAM2;MEGF9
SMAD3_21741376_ChIP-Seq_EPCs_Human	0.319605	YAP1;SMAD2;LGI1;FARP1;NEBL;UXS1;LIFR;SOX11;MSI2;FRY;GRAMD3;MLF1;TIAM1;PLCXD3;NRG3;ZMAT3;DOK5;RNF19A;TP53BP2;STK38L;SOX9;PFN2
POU3F2_20337985_ChIP-ChIP_501MEL_Human	0.320324	SMAD2;GPM6A;NEBL;CAB39L;PDE4DIP;MAT2B;SULF1;MLF1;HERC5;SOX2;PDLIM3;EDNRB;NFIB;ZMAT3;NNT;CDH10;CNTN1;ITGB8;FBXO8;TMEM38B;BMPR1B;SOX6;PFN2
SOX2_16153702_ChIP-ChIP_HESCs_Human	0.333906	LGI1;FZD3;NEBL;LMO3;KLHL13;MAT2B;ADD3;SULF1;FGF2;SOX2;ABLIM1;NFIA;CDH2;PCBP1;DPYSL3;RRAGD;KPNA3;STEAP2
RARG_19884340_ChIP-ChIP_MEFs_Mouse	0.349131	YAP1;DPYSL3;BAALC;AEBP1;SULF1;ADD3;GLIS2
FUS_26573619_Chip-Seq_HEK293_Human	0.349131	ENAH;NAP1L3;ITGB8;SOX9;MAT2B;GRAMD3;GNG12;PAM;CAP2
TP53_20018659_ChIP-ChIP_R1E_Mouse	0.349131	NANOS1;NTRK2;SDC4;HSPB8;AK1;EPHX1;PLOD2;SOX11;ADCY8;DAK;AR;NFIA;ZMAT3;SIDT1;SOX9;RIN1
TBL1_22424771_ChIP-Seq_293T_Human	0.349131	NOTCH2;AHCYL1;HSPB8;FMN2;ADD3;ABLIM1;SPOCK2;ZNHIT6;TP53BP2;SLC16A9;NANOS1;PRPF38A;NEBL;LMO3;PDE4DIP;GNG12;SIRT1;PRDX6;ENAH;ARHGAP32;RCN1;NRG3;NFIA;CNTN1;CD44;BMPR1A
GATA3_27048872_Chip-Seq_THYMUS_Human	0.349131	CAB39L;GMPR;PBXIP1;ZNF45;MSI2;AEBP1;ADD3;AQP1;TMEM123;ZMAT3;STOM;STK38L;MTA3;RBM17;SPNS3;PDE4DIP;PYGO1;CLEC4A;TIAM1;CDC42EP4;SIDT1;TXNIP;IL17D;EZR;FBXL4;GPR125
HOXB7_26014856_ChIP-Seq_BT474_Human	0.349131	NOTCH2;ACSS3;AHCYL1;SDC2;ATP1A2;AQP1;HERC5;RNF19A;DPYSL3;ITGB8;STK38L;BAALC;GPC4;MTA3;KPNA3;DAK;CLEC4A;DOK5;CDH10;CDC42EP4;SIDT1;ZNF853;CD24;KCTD15;MDM1;PFN2
AR_21915096_ChIP-Seq_LNCaP-1F5_Human	0.349131	SLC22A4;AHCYL1;AHNAK;GOLIM4;ATP1A2;FRY;ADD3;CLU;AGPAT3;SPOCK2;STK38L;TMEM38B;CAP2;RALBP1;NEBL;EPHX1;PRDX6;ENAH;ARHGAP32;PLCXD3;CD109;SPARCL1;AIDA;EZR;FBXL4;CD44
PPARA_22158963_ChIP-Seq_LIVER_Mouse	0.349131	SLC22A4;NOTCH2;ACSS3;SDC4;TOB1;CLU;AGPAT3;NNT;PCBP1;STOM;TMEM38B;SOX6;IL33;SPNS3;EPHX1;LIFR;PRDX6;GFAP;RSPH1;FAM173B;DAAM1;NFIB;CDC42EP4;TXNIP;GPD1L;NAT8L
GATA1_19941827_ChIP-Seq_MEL86_Mouse	0.349131	NOTCH2;GPM6A;AHNAK;ANKRD35;ARHGAP5;ADD3;AGPAT3;AQP1;TMEM123;PCBP1;BOC;DIRC2;SOX6;KPNA3;IL33;GFPT2;PDE4DIP;LYSMD4;TIAM1;PSAT1;CDC42EP4;KIT;EHBP1L1;TXNIP;SERPING1;EZR
EZH2_27294783_Chip-Seq_ESCs_Mouse	0.349131	SLC22A4;GOLIM4;GLIS3;ADCY8;SOX2;EDNRB;CDH2;SPOCK2;ITGB8;SOX9;SOX6;NTRK2;FARP1;FZD3;NEBL;PRKCA;SOX11;GFAP;AR;NFIA;RRAGD;SIDT1;NAT8L;IL17D;KCTD15;MDM1
RNF2_16625203_ChIP-ChIP_MESCs_Mouse	0.363074	FZD3;NEBL;PLOD2;SOX11;AEBP1;ADCY8;PCDH18;MLF1;AR;EDNRB;NFIA;CDH2;NFIB;BOC;SIDT1;SLC16A9;SOX9
ERG_20517297_ChIP-Seq_VCAP_Human	0.391406	CTNND2;SPNS3;GLIS3;MAT2B;ADD3;AGPAT3;TIAM1;MDFIC;NFIB;ZMAT3;CDC42EP4;TP53BP2;ITGB8;BAALC;TMEM38B
DNAJC2_21179169_ChIP-ChIP_NT2_Human	0.405524	NTRK2;RALBP1;AHNAK;PON2;PLOD2;DAK;ABLIM1;BOC;RRAGD;RABL3;CNTN1;TXNIP;ITGB8
RUNX2_22187159_ChIP-Seq_PCA_Human	0.41148	ACSS3;CTNND2;FAM13A;GLIS3;PLOD2;KLHL13;MAT2B;FMN2;GRAMD3;FRY;PCDH18;NR3C2;TMEM47;PDLIM3;CDH2;ZMAT3;DPYSL3;BOC;TP53BP2;SPIN1;SOX9;GPC4;SOX6;MTA3;MYH10;RFTN2;NTRK2;SMAD1;SCARA3;LIFR;OCRL;SOX11;SULF1;IQCK;RCN1;NFIA;FAM173B;DAAM1;NFIB;KIT;GPR125
TDRD3_21172665_ChIP-Seq_MCF-7_Human	0.417891	RALBP1;NNT;EYA2;CDC42EP4;GMPR;BAALC;MSI2;SOX9;MTA3;GLIS2
SCL_21571218_ChIP-Seq_MEGAKARYOCYTES_Human	0.422906	RBM17;SCARA3;SDC4;CTNND2;HSPB8;AK1;GMPR;XIAP;SOX11;MSI2;ADD3;GNG12;PCDH18;PRDX6;RYR3;TMEM123;ZMAT3;CD109;KIT;EHBP1L1;STK38L;BAALC;NAT8L
GF1_26923725_Chip-Seq_HPCs_Mouse	0.427482	NOTCH2;UXS1;SOX11;PRKCA;MSI2;ADD3;PCDH18;TIAM1;DOK5;SPOCK2;PCBP1;CD109;DPYSL3;KIT;RRAGD;SLC16A9;DIRC2;GPR125;MEGF9
TCF3_18692474_ChIP-Seq_MEFs_Mouse	0.431385	SOX2;RCN1;PDLIM3;NFIB;RRAGD;KIT;SPIN1;GPC4;PRDX6;JAM2;AGPAT3
CDX2_20551321_ChIP-Seq_CACO-2_Human	0.442902	NOTCH2;YAP1;SDC4;DPYSL3;PDE4DIP;MSI2;TOB1;PRDX6
PHC1_16625203_ChIP-ChIP_MESCs_Mouse	0.442902	NTRK2;FZD3;NEBL;SOX11;ADCY8;PCDH18;AR;NFIA;CDH2;BOC;SIDT1;SOX9;CD44
ESR2_21235772_ChIP-Seq_MCF-7_Human	0.442902	CTNND2;CDH10;HSPB8;AKR1C2;PLOD2;SOX9;CAP2
SUZ12_16625203_ChIP-ChIP_MESCs_Mouse	0.442902	SLC22A4;NTRK2;FZD3;NEBL;PRKCA;AEBP1;ADCY8;PCDH18;AR;PLCXD3;NFIA;CDH2;NFIB;SIDT1;SLC16A9;SOX9;KCTD15
RELA_24523406_ChIP-Seq_FIBROSARCOMA_Human	0.442902	RBM17;SDC4;AHNAK;UXS1;XIAP;ATP1A2;EHBP1;AR;CDC42EP4;RNF19A;ITGB8;NBN;EFHC2;SOX9;DIRC2;CD44
SRF_21415370_ChIP-Seq_HL-1_Mouse	0.447059	PRPF38A;AHNAK;CAB39L;AK1;EPHX1;GOLIM4;PDE4DIP;PBXIP1;MAT2B;CLU;DAK;B3GALTL;ABLIM1;RAB23;SIDT1;STOM;TMEM38B;IL17D;STEAP2;MYH10;MEGF9
RUNX1_27514584_Chip-Seq_MCF-7_Human	0.447059	NOTCH2;RASL12;SDC4;ANKRD35;HSPB8;TOB1;ABLIM1;RNF19A;SOX9;CAP2;KLHDC2;NANOS1;RALBP1;EYA2;PDE4DIP;PRKCA;SOX11;SULF1;SIRT1;AR;NFIB;DOK5;ID4;ZNF853;MEGF9
NANOG_20526341_ChIP-Seq_ESCs_Human	0.447059	NOTCH2;AHNAK;HSPB8;FAM13A;PBXIP1;MAT2B;GRAMD3;TOB1;FGF2;GLIS2;PDLIM3;SPOCK2;TP53BP2;LGI1;PRKCA;MLF1;ENAH;CLEC4A;RSPH1;MDFIC;SERPING1;BMPR1B;FBXL4;CD44;MEGF9
KDM2B_26808549_Chip-Seq_REH_Human	0.447059	GPM6A;FRY;ARHGAP5;ADCY8;GRAMD3;RYR3;EDNRB;ZMAT3;MFAP3L;RBM17;SMAD1;RALBP1;LMO3;SULF1;MLF1;B3GALTL;TIAM1;FAM173B;NFIB;DOK5;CD109;KIT;EHBP1L1;BMPR1B;BMPR1A
LMO2_26923725_Chip-Seq_HEMOGENIC-ENDOTHELIUM_Mouse	0.447059	NOTCH2;HSPB8;MSI2;FMN2;FRY;EDNRB;SPOCK2;PCBP1;RNF19A;DPYSL3;BAALC;MTA3;PRKCA;LIFR;ATP1B2;PYGO1;TIAM1;AR;DAAM1;MDFIC;DOK5;CD109;KIT;CD200;CD44
KDM2B_26808549_Chip-Seq_HPB-ALL_Human	0.447059	AHNAK;ANKRD35;ARHGAP5;ADD3;TOB1;CLU;AGPAT3;GLIS2;ABLIM1;CDH2;SPOCK2;RNF19A;SLC16A9;NANOS1;RBM17;EPHX1;PDE4DIP;SIRT1;RCN1;NFIB;SIDT1;AIDA;RIN1;IL17D;CD44
NFYB_21822215_ChIP-Seq_K562_Human	0.447059	NOTCH2;AHCYL1;AHNAK;FMN2;SPOCK2;ZNHIT6;TP53BP2;SLC16A9;SOX6;FARP1;PRPF38A;NEBL;LMO3;PDE4DIP;GNG12;SIRT1;PRDX6;ENAH;RCN1;NRG3;NFIA;CNTN1;AIDA;CD44;BMPR1A
PBX_27287812_Chip-Seq_EMBYONIC-LIMB_Mouse	0.447059	ACSS3;ANKRD35;SYNPO2;UXS1;AK1;PBXIP1;FGF2;NR3C2;ABLIM1;DPYSL3;BOC;SOX9;FBXO8;MYH10;SCARA3;EYA2;NAP1L3;PDE4DIP;LIFR;LYSMD4;SULF1;CCDC80;NFIA;DPY19L3;CDH10
P53_22387025_ChIP-Seq_ESCs_Mouse	0.447059	SYNPO2;UXS1;GOLIM4;ATP1A2;FMN2;PCDH18;RYR3;SOX2;RAB23;TMEM38B;RBM17;NEBL;EYA2;EPHX1;SULF1;PRDX6;ENAH;RCN1;CACNB4;DOK5;BMPR1B;PAM;CD44;MEGF9;PFN2
RACK7_27058665_Chip-Seq_MCF-7_Human	0.447059	YAP1;AHCYL1;SDC4;AHNAK;HSPB8;MAT2B;ADD3;GLIS2;TMEM123;ABLIM1;ZNHIT6;TP53BP2;SLC16A9;KLHDC2;FARP1;GNG12;PRDX6;ENAH;NFIB;EHBP1L1;TXNIP;GPD1L;EZR;CD44;BMPR1A
DMRT1_21621532_ChIP-ChIP_FETAL_Ovary	0.45237	ABLIM1;TOB1;AGPAT3
JARID2_20064375_ChIP-Seq_MESCs_Mouse	0.463464	NTRK2;SCARA3;CTNND2;GLIS3;ADCY8;EHBP1;AR;CACNB4;NRG3;NFIA;CDH2;SIDT1;SOX9;NAT8L;SOX6
PRDM5_23873026_ChIP-Seq_MEFs_Mouse	0.463464	PON2;SDC2;XIAP;KLHL13;ALDH5A1;TSPAN6;RAB23;RNF19A;SPIN1;NBN;TMEM38B;EZR;SYBU;CAP2
TEAD4_22529382_ChIP-Seq_TROPHECTODERM_Mouse	0.469456	NOTCH2;SDC4;AHNAK;UXS1;CTNND2;GLIS3;MLC1;FRY;ADD3;NR3C2;EDNRB;CDH2;NBN;TMEM38B;SOX6;JAM2;SMAD2;FARP1;RBM17;FZD3;PDE4DIP;OCRL;TIAM1;MRAS;CACNB4;DAAM1;DOK5;CRK
SETDB1_19884255_ChIP-Seq_MESCs_Mouse	0.470644	SDC4;AHNAK;CAB39L;PON2;PLOD2;MSI2;ADCY8;SOX2;ABLIM1;EDNRB;SOX6;JAM2;MFAP3L;NANOS1;PRKCA;SULF1;SIRT1;DPY19L3;DAAM1;CDC42EP4;ID4;SERPING1;FBXL4;KCTD15;MEGF9
PADI4_21655091_ChIP-ChIP_MCF-7_Human	0.474592	NOTCH2;ACSS3;RALBP1;CAB39L;GOLIM4;PDE4DIP;LYSMD4;FRY;ARHGAP5;ADD3;TOB1;EHBP1;DOK5;AIDA
GBX2_23144817_ChIP-Seq_PC3_Human	0.478784	NOTCH2;NNT;CNTN1;ADCY8;RYR3
ZIC3_20872845_ChIP-ChIP_MESCs_Mouse	0.478784	SOX2;CD109;TXNIP;ATP1B2;SLC16A9;IL17D
SOX2_18358816_ChIP-ChIP_MESCs_Mouse	0.488999	ENAH;SOX2;NTRK2;TIAM1;RCN1;MRAS;KIT;SPARCL1;PBXIP1;GPC4;SULF1
GF1B_26923725_Chip-Seq_HPCs_Mouse	0.496561	YAP1;UXS1;PRKCA;MSI2;ATP1B2;ADD3;TIAM1;ABLIM1;EDNRB;NFIA;FAM173B;DOK5;ZNHIT6;PCBP1;CD109;DPYSL3;RRAGD;DIRC2;MYH10;CD44;PFN2
POU5F1_16153702_ChIP-ChIP_HESCs_Human	0.507461	SOX2;LGI1;NFIA;NEBL;DPYSL3;SULF1;ADD3;FGF2;STEAP2
NKX2-5_21415370_ChIP-Seq_HL-1_Mouse	0.516601	NANOS1;NOTCH2;AHCYL1;CAB39L;PON2;UXS1;EPHX1;FRY;GNG12;FGF2;MLF1;RCN1;ABLIM1;MDFIC;RIN1;PAM;STEAP2;MYH10;MFAP3L
Nerf2_26677805_Chip-Seq_MACROPHAGESS_Mouse	0.523526	NOTCH2;SLC22A4;PON2;CTNND2;DENND2A;NAP1L3;PRDX6;IQCK;CCDC80;EDNRB;DAAM1;MDFIC;RNF19A;SLC16A9;EZR;FBXL4;PAM
TP63_22573176_ChIP-Seq_HFKS_Human	0.527372	ANKRD35;SYNPO2;GOLIM4;GLIS3;MLC1;GMPR;ATP1A2;PBXIP1;AK4;MAT2B;GRAMD3;ARHGAP5;GLIS2;ABLIM1;PDLIM3;EDNRB;NNT;BOC;BAALC;SOX6;MTA3;FARP1;RALBP1;SCARA3;DENND2A;PRKCA;OCRL;LYSMD4;DAK;TMEM231;GFAP;ENAH;TIAM1;ARHGAP32;CACNB4;NFIA;DAAM1;NFIB;CDC42EP4;EHBP1L1;TXNIP;ZNF853;GPD1L;EFHC2;EZR;GPR125;KCTD15;CD44
POU5F1_18692474_ChIP-Seq_MESCs_Mouse	0.528977	SDC4;ANKRD35;AHNAK;UXS1;AK1;ATP1A2;KLHL13;MAT2B;GRAMD3;AGPAT3;GLIS2;SOX2;PDLIM3;NNT;RAB23;SPIN1;STK38L;ITGB8;GPC4;KPNA3;JAM2;KLHDC2;RBM17;NTRK2;RALBP1;FZD3;EPHX1;SOX11;ATP1B2;SULF1;PRDX6;DAK;ENAH;IQCK;CACNB4;NFIA;NFIB;PSAT1;CDH10;CD109;KIT;RRAGD;TXNIP;SPARCL1;IL17D;STEAP2;MDM1;BMPR1A
SETDB1_19884257_ChIP-Seq_MESCs_Mouse	0.543402	GPM6A;PLOD2;MSI2;CLU;SOX2;EDNRB;SPOCK2;BOC;SPIN1;SOX9;TMEM38B;JAM2;RBM17;RALBP1;EPHX1;PDE4DIP;SIRT1;GFAP;ENAH;TIAM1;PLCXD3;MRAS;CPE;AIDA;EZR;FBXL4;KCTD15;PFN2
RXR_22108803_ChIP-Seq_LS180_Human	0.544966	NFIA;PON2;PCBP1;GMPR;GPD1L;MSI2;SOX9;GRAMD3
MYCN_27167114_Chip-Seq_NEUROBLASTOMA_Human	0.544966	NTRK2;RASL12;RBM17;AHNAK;HSPB8;PDE4DIP;GNG12;TOB1;FGF2;SIRT1;DAK;PYGO1;TMEM123;RCN1;NRG3;NFIA;CDH2;SPOCK2;SIDT1;TXNIP;RIN1;KPNA3;STEAP2;BMPR1A
TCF21_26020271_ChIP-Seq_SMOOTH_MUSCLE_Human	0.544966	RASL12;RBM17;SDC4;CAB39L;UXS1;HSPB8;DENND2A;AK1;PBXIP1;ADD3;CLU;GLIS2;PDLIM3;CCDC80;DAAM1;CDC42EP4;ID4;STOM;ITGB8;SPARCL1;STEAP2;CAP2;MEGF9;PFN2
NFYA_21822215_ChIP-Seq_K562_Human	0.544966	NOTCH2;LGI1;FARP1;PRPF38A;AHNAK;NEBL;HSPB8;PDE4DIP;FMN2;ADD3;GNG12;SIRT1;PRDX6;ENAH;RCN1;NRG3;NFIA;ZNHIT6;CNTN1;TP53BP2;SLC16A9;SOX6;CD44;BMPR1A
RUNX1_22897851_ChIP-Seq_JUKARTE6-1_Human	0.544966	RBM17;FZD3;ANKRD35;GMPR;ZNF45;MSI2;ADD3;PRDX6;AGPAT3;MLF1;TIAM1;ABLIM1;RCN1;NFIB;CDC42EP4;RNF19A;DPYSL3;RRAGD;AIDA;GPD1L;SOX9;KPNA3;CD44;MFAP3L
HNFA_21074721_ChIP-Seq_CACO-2_Human	0.544966	NANOS1;NOTCH2;LGI1;RBM17;PRPF38A;AHCYL1;ANKRD35;NEBL;PDE4DIP;FMN2;ADD3;GNG12;SIRT1;PRDX6;ENAH;ABLIM1;EDNRB;NRG3;NFIA;SPOCK2;ZNHIT6;TP53BP2;SLC16A9;BMPR1A
NANOG_18555785_Chip-Seq_ESCs_Mouse	0.544966	RBM17;NEBL;EYA2;SYNPO2;UXS1;EPHX1;GOLIM4;ATP1A2;FMN2;SULF1;PRDX6;RYR3;ENAH;RCN1;CACNB4;NFIA;DOK5;RAB23;ZNHIT6;BMPR1B;FBXL4;PAM;CD44;PFN2
CEBPB_26923725_Chip-Seq_HEMOGENIC-ENDOTHELIUM_Mouse	0.544966	NTRK2;RBM17;ANKRD35;GLIS3;GMPR;LIFR;MAT2B;ADD3;MLF1;B3GALTL;TMEM123;PDLIM3;CCDC80;DAAM1;DOK5;SPOCK2;CDC42EP4;PCBP1;RNF19A;CD109;BOC;EFHC2;TMEM38B;KCTD15
SA1_22415368_ChIP-Seq_MEFs_Mouse	0.544966	NTRK2;FARP1;RALBP1;SYNPO2;SDC2;AK1;PDE4DIP;SOX11;PCDH18;EHBP1;SOX2;ALDH5A1;NFIA;DPY19L3;FAM173B;CDH2;NFIB;CDH10;SOX9;RIN1;KPNA3;RABL5;KCTD15;PFN2
SMC3_22415368_ChIP-Seq_MEFs_Mouse	0.544966	NTRK2;RALBP1;AHNAK;DENND2A;AK1;EPHX1;PRKCA;SOX11;CLU;PCDH18;DAK;GLIS2;SOX2;CCDC80;DAAM1;CDH10;EHBP1L1;CPE;BAALC;SOX9;RIN1;EZR;SOX6;CD200
P300_27058665_Chip-Seq_ZR-75-30cells_Human	0.544966	SMAD1;ACSS3;AHCYL1;SDC2;HSPB8;PBXIP1;ADD3;GNG12;NR3C2;GFAP;PYGO1;ENAH;RCN1;CCDC80;EDNRB;NFIA;CD109;EHBP1L1;STK38L;KPNA3;MYH10;JAM2;CD44;BMPR1A
SUZ12_27294783_Chip-Seq_ESCs_Mouse	0.544966	FZD3;SOX11;ATP1B2;FMN2;ADD3;ADCY8;GFAP;SOX2;EDNRB;NFIA;CDH2;SPOCK2;RRAGD;SIDT1;ID4;SLC16A9;SOX9;IL17D;SOX6;PAM;KCTD15;CD200;CAP2;MFAP3L
DPY_21335234_ChIP-Seq_ESCs_Mouse	0.544966	SMAD2;IL33;ANKRD35;UXS1;ATP1A2;SOX11;MSI2;FMN2;SULF1;TOB1;GFAP;B3GALTL;MRAS;NFIA;RAB23;PCBP1;SPARCL1;SERPING1;SLC16A9;PAM;KPNA3;MYH10;JAM2;KCTD15
ZFP281_18757296_ChIP-ChIP_E14_Mouse	0.550013	YAP1;NOTCH2;SDC4;AK1;PBXIP1;SOX11;MSI2;ADCY8;TOB1;ENAH;SOX2;TIAM1;PDLIM3;MDFIC;NFIB;CDC42EP4;TXNIP;GPD1L;RIN1;TMEM38B;MTA3;KPNA3;MYH10;JAM2
CEBPB_26923725_Chip-Seq_HEMANGIOBLAST_Mouse	0.557198	TMEM47;B3GALTL;DOK5;SPOCK2;CD109;SOX6;KCTD15;MLF1;NR3C2
POU5F1_18700969_ChIP-ChIP_MESCs_Mouse	0.559247	TMEM47;SOX2;YAP1;PSAT1;KIT;TXNIP;GPC4;PRDX6
CBX2_27304074_Chip-Seq_ESCs_Mouse	0.590024	TMEM47;SMAD2;NFIA;CDH2;NFIB;NNT;CDH10;KLHL13;SOX9;SOX6;FBXL4
ZFP281_18358816_ChIP-ChIP_MESCs_Mouse	0.591837	SOX2;ENAH;YAP1;FZD3;NFIA;SDC4;CDC42EP4;MYH10
CLOCK_20551151_ChIP-Seq_293T_Human	0.591837	SDC2;TSPAN6;EPHX1;ATP1A2;CLU;AQP1
TCF7L2_21901280_ChIP-Seq_H4IIE_Rat	0.593376	KLHDC2;NTRK2;IL33;EPHX1;PLOD2;PRKCA;ATP1A2;NFIA;CDH2;MDFIC;NNT;RABL3;SOX6
GATA4_21415370_ChIP-Seq_HL-1_Mouse	0.598817	YAP1;SCARA3;FZD3;NEBL;PON2;AK1;GOLIM4;ARHGAP5;HERC5;B3GALTL;ABLIM1;RCN1;MRAS;DAAM1;NFIB;CPE;NBN;FBXO8;TMEM38B;SOX6;FBXL4;PAM;STEAP2;PFN2
NOTCH1_21737748_ChIP-Seq_TLL_Human	0.602308	PRKCA;ZNF45;SIRT1;CRK
RUNX1_26923725_Chip-Seq_HPCs_Mouse	0.630581	TMEM123;TIAM1;CDC42EP4;ZNHIT6;PRKCA;LIFR;AEBP1;SOX6;MLF1;GLIS2;PFN2
NANOG_18700969_ChIP-ChIP_MESCs_Mouse	0.634168	ENAH;TIAM1;RCN1;KIT;STK38L
SOX11_23321250_ChIP-ChIP_Z138-A519-JVM2_Human	0.634168	NTRK2;AHNAK;LMO3;DENND2A;AK1;ATP1A2;MSI2;GNG12;ENAH;CACNB4;CD109;ITGB8;DIRC2;CRK
SMAD1_18555785_ChIP-Seq_MESCs_Mouse	0.634168	SOX2;ANKRD35;PON2;RRAGD;KIT;TXNIP;LIFR;JAM2
SALL4_18804426_ChIP-ChIP_MESCs_Mouse	0.634168	NOTCH2;SDC4;SOX11;SULF1;TOB1;SOX2;RCN1;CACNB4;NFIB;KIT;STK38L;GPC4;JAM2
CSB_26484114_Chip-Seq_FIBROBLAST_Human	0.634168	ANKRD35;EYA2;SYNPO2;SDC2;GOLIM4;PDE4DIP;PLOD2;PBXIP1;LIFR;ATP1A2;GNG12;PRDX6;GFAP;DAK;CLEC4A;CCDC80;FAM173B;CDC42EP4;DPYSL3;STK38L;BAALC;NBN;KPNA3
CBP_21632823_ChIP-Seq_H3396_Human	0.634168	YAP1;NANOS1;LGI1;FARP1;RBM17;AHNAK;NEBL;AKR1C2;ADD3;SIRT1;DAK;TMEM123;ABLIM1;RCN1;NRG3;SPOCK2;CNTN1;STK38L;SLC16A9;SOX6;CD44;BMPR1A;MDM1
ATF3_23680149_ChIP-Seq_GBM1-GSC_Human	0.634168	SDC4;SYNPO2;HSPB8;FAM13A;FHL1;PLOD2;CLU;PCDH18;HERC5;SOX2;ABLIM1;SOX9;LGI1;SMAD1;PRPF38A;GFPT2;DENND2A;PRDX6;ENAH;RCN1;CCDC80;DAAM1;CD109;RIN1;PFN2
OCT1_27270436_Chip-Seq_PROSTATE_Human	0.634168	SMAD2;AHNAK;ANKRD35;GFPT2;DENND2A;LIFR;SOX11;ADD3;PRDX6;AGPAT3;MLF1;AQP1;ARHGAP32;RSPH1;PDLIM3;NFIB;ZMAT3;CDC42EP4;RNF19A;CNTN1;TP53BP2;ID4;ITGB8
GATA6_21074721_ChIP-Seq_CACO-2_Human	0.634168	NOTCH2;RBM17;PRPF38A;AHCYL1;ANKRD35;NEBL;EPHX1;AKR1C2;PDE4DIP;PBXIP1;ATP1A2;FMN2;GNG12;PRDX6;ENAH;NRG3;NFIA;ZNHIT6;TP53BP2;TXNIP;AIDA;SOX6;BMPR1A
SPI1_26923725_Chip-Seq_HPCs_Mouse	0.634168	FARP1;RBM17;AHNAK;DENND2A;EPHX1;LIFR;LYSMD4;ATP1B2;ADD3;DAK;GLIS2;PYGO1;ARHGAP32;TMEM123;RSPH1;FAM173B;CDC42EP4;KIT;STOM;STK38L;SERPING1;RIN1;MYH10
UTX_26944678_Chip-Seq_JUKART_Human	0.634168	NOTCH2;SMAD2;RBM17;PRPF38A;AHCYL1;SPNS3;PDE4DIP;SOX11;MAT2B;ADD3;TOB1;SIRT1;PRDX6;EHBP1;AGPAT3;CLEC4A;ABLIM1;NFIA;EHBP1L1;STK38L;MTA3;CD44;MDM1
FOXA1_27270436_Chip-Seq_PROSTATE_Human	0.634168	LGI1;AHNAK;ANKRD35;CTNND2;HSPB8;FAM13A;SIRT1;AGPAT3;MLF1;AQP1;ALDH5A1;MDFIC;NFIB;PSAT1;NNT;PCBP1;RNF19A;BOC;RRAGD;SLC16A9;GPD1L;CRK;CD44
RUNX1_22412390_ChIP-Seq_EML_Mouse	0.634168	KLHDC2;SMAD2;SDC4;EYA2;SYNPO2;PRKCA;AEBP1;GNG12;B3GALTL;TMEM123;RSPH1;CCDC80;DAAM1;KIT;EHBP1L1;GPD1L;NBN;NAT8L;DIRC2;IL17D;EZR;CRK;MFAP3L
FOXA1_25329375_ChIP-Seq_VCAP_Human	0.634168	LGI1;AHNAK;ANKRD35;CTNND2;HSPB8;FAM13A;SIRT1;AGPAT3;MLF1;AQP1;ALDH5A1;MDFIC;NFIB;PSAT1;NNT;PCBP1;RNF19A;BOC;RRAGD;SLC16A9;GPD1L;CRK;CD44
JUN_26020271_ChIP-Seq_SMOOTH_MUSCLE_Human	0.634168	YAP1;SMAD2;ACSS3;SDC4;HSPB8;GMPR;PDE4DIP;CLU;FGF2;MLF1;RYR3;B3GALTL;CCDC80;ZMAT3;DOK5;CD109;TP53BP2;STK38L;RIN1;TMEM38B;PAM;CD200;GPR125
GATA4_25053715_ChIP-Seq_YYC3_Human	0.634168	YAP1;ACSS3;SDC4;NEBL;CTNND2;SPNS3;GOLIM4;KLHL13;ARHGAP5;ADD3;ADCY8;CLU;EHBP1;CDH2;SPOCK2;CDC42EP4;PCBP1;RNF19A;SOX9;MTA3;CD44;GPR125;BMPR1A
CDX2_21074721_ChIP-Seq_CACO-2_Mouse	0.634168	LGI1;RBM17;PRPF38A;AHCYL1;NEBL;EPHX1;PDE4DIP;ATP1A2;FMN2;GNG12;SIRT1;PRDX6;ENAH;RCN1;NRG3;NFIA;SPOCK2;ZNHIT6;TP53BP2;AIDA;SLC16A9;SOX6;CD44
KAP1_27257070_Chip-Seq_ESCs_Mouse	0.634168	SDC4;AHNAK;ANKRD35;UXS1;GFPT2;SPNS3;EPHX1;XIAP;PDE4DIP;AEBP1;MAT2B;SIRT1;SOX2;RSPH1;RCN1;PSAT1;ID4;SERPING1;NBN;EZR;FBXL4;JAM2;KCTD15
KDM2B_26808549_Chip-Seq_K562_Human	0.634168	YAP1;NANOS1;RBM17;FZD3;AHNAK;PDE4DIP;PRKCA;MSI2;ARHGAP5;GNG12;TOB1;PRDX6;GLIS2;PYGO1;ENAH;NFIA;TP53BP2;ID4;AIDA;SLC16A9;NAT8L;PAM;KCTD15
UBF1/2_26484160_Chip-Seq_HMECs_Human	0.634168	KLHDC2;NOTCH2;RBM17;PRPF38A;EPHX1;PDE4DIP;TOB1;FGF2;SIRT1;EHBP1;GFAP;PYGO1;TMEM123;NFIA;DPY19L3;NFIB;RNF19A;CD109;TP53BP2;SLC16A9;SOX9;NAT8L;BMPR1A
EBF1_22473956_ChIP-Seq_LYMPHODE_Mouse	0.634168	RFTN2;NOTCH2;RBM17;NEBL;EYA2;UXS1;EPHX1;ATP1A2;FMN2;SULF1;FGF2;PRDX6;RYR3;ENAH;RCN1;CACNB4;RAB23;ZNHIT6;STOM;TMEM38B;PAM;CD44;PFN2
TAL1_21186366_ChIP-Seq_BM-HSCs_Mouse	0.634168	NTRK2;ACSS3;CTNND2;GMPR;PRKCA;SOX11;MSI2;MAT2B;ARHGAP5;TOB1;SIRT1;EHBP1;AGPAT3;DAAM1;SPOCK2;CDC42EP4;ID4;ITGB8;SLC16A9;SOX9;MYH10;CAP2;MDM1
RARB_27405468_Chip-Seq_BRAIN_Mouse	0.634168	SMAD2;LGI1;RALBP1;ANKRD35;NEBL;EYA2;GMPR;PRKCA;MSI2;FMN2;TOB1;RYR3;NR3C2;PYGO1;MRAS;NRG3;SPOCK2;CDH10;PCBP1;BAALC;RIN1;IL17D;CRK
CREB1_26743006_Chip-Seq_LNCaP_Human	0.634168	RBM17;SMAD1;PDE4DIP;MSI2;MAT2B;FRY;GNG12;SIRT1;PRDX6;EHBP1;AGPAT3;TMEM231;TMEM123;NFIA;DPY19L3;RAB23;CDC42EP4;TXNIP;BMPR1B;IL17D;MTA3;PAM;KCTD15
LXR_22158963_ChIP-Seq_LIVER_Mouse	0.634168	FARP1;ACSS3;SDC4;EPHX1;PDE4DIP;LIFR;FRY;ARHGAP5;GNG12;TOB1;PRDX6;MLF1;RSPH1;ABLIM1;ALDH5A1;NFIA;DAAM1;CDH2;ZNHIT6;CDC42EP4;TXNIP;SERPING1;FBXO8
RCOR3_21632747_ChIP-Seq_MESCs_Mouse	0.634168	MSI2;ARHGAP5;TOB1;ABLIM1;EDNRB;ZMAT3;SPOCK2;PCBP1;MTA3;JAM2;LGI1;NTRK2;EYA2;SPNS3;EPHX1;LIFR;SULF1;MLF1;B3GALTL;ENAH;TIAM1;RSPH1;NRG3;DOK5;CDH10;RRAGD;SIDT1;RIN1;BMPR1B;IL17D;EZR;KCTD15
KLF5_18264089_ChIP-ChIP_MESCs_Mouse	0.641445	SOX2;DENND2A
KLF2_18264089_ChIP-ChIP_MESCs_Mouse	0.641445	SOX2;DENND2A
KLF4_18264089_ChIP-ChIP_MESCs_Mouse	0.64765	SOX2;DENND2A
SALL1_21062744_ChIP-ChIP_HESCs_Human	0.653806	NNT;FGF2
ESR1_17901129_ChIP-ChIP_LIVER_Mouse	0.657182	SLC22A4;AHCYL1;SDC4;PRDX6;GPR125;KCTD15
PPARG_19300518_ChIP-PET_3T3-L1_Mouse	0.664417	PON2;HSPB8;ATP1A2;RIN1
AR_21572438_ChIP-Seq_LNCaP_Human	0.664417	NRG3;DOK5;SOX9
ELF5_23300383_ChIP-Seq_T47D_Human	0.665309	YAP1;ANKRD35;GFPT2;LIFR;SULF1;TOB1;DAK;TMEM123;RSPH1;NFIA;ZMAT3;DPYSL3;MFAP3L
GATA1_21571218_ChIP-Seq_MEGAKARYOCYTES_Human	0.665309	NOTCH2;UXS1;CTNND2;AK1;GOLIM4;XIAP;MSI2;FRY;GRAMD3;CLU;AGPAT3;RYR3;NR3C2;AQP1;TMEM123;ABLIM1;DPYSL3;SPIN1;BAALC;PDE4DIP;PRKCA;GNG12;TIAM1;RSPH1;NFIB;CD109;KIT;PAM;MDM1
YY1_23942234_ChIP-Seq_MYOBLASTS_AND_MYOTUBES_Mouse	0.674135	NOTCH2;PRPF38A;AHCYL1;AHNAK;SYNPO2;GLIS3;PDE4DIP;MSI2;ADCY8;SIRT1;DAAM1;NFIB;RABL3;CPE;CRK;STEAP2;SYBU
RAD21_21589869_ChIP-Seq_MESCs_Mouse	0.675128	SMAD1;AHNAK;ANKRD35;HSPB8;DENND2A;AK1;EPHX1;GOLIM4;CLU;RSPH1;CCDC80;CDH10;DPYSL3;BOC;SIDT1;CPE;BAALC;SOX9;BMPR1B;CRK;JAM2;GPR125;PFN2
HOXD13_18407260_ChIP-ChIP_DEVELOPING-LIMBS_Mouse	0.699509	TIAM1;STK38L;ITGB8
NR3C1_23031785_ChIP-Seq_PC12_Mouse	0.699509	LGI1;RCN1;PDLIM3;SDC4;CDH2;DPYSL3;CPE;FBXO8;ADD3;FGF2;MEGF9
EED_16625203_ChIP-ChIP_MESCs_Mouse	0.708189	SLC22A4;AR;NTRK2;CDH2;NEBL;BOC;SIDT1;SOX9;ADCY8;PCDH18
HOXA2_22223247_ChIP-Seq_E11.5_EMBRYO_Mouse	0.708189	BAALC
GATA2_21666600_ChIP-Seq_HMVEC_Human	0.723451	ABLIM1;DAAM1;MDFIC;NFIB;CD109;TXNIP;FRY;CRK;MEGF9;DAK
MYCN_18555785_ChIP-Seq_MESCs_Mouse	0.723451	NOTCH2;SDC4;MSI2;MAT2B;SOX2;NNT;PCBP1;SPIN1;FBXO8;DIRC2;KPNA3;MYH10;JAM2;MFAP3L;NANOS1;PRPF38A;ENAH;IQCK;DAAM1;PSAT1;KIT;RABL3;CPE;GPD1L;PAM
SMAD_19615063_ChIP-ChIP_OVARY_Human	0.72869	STK38L;ARHGAP5
NR4A2_19515692_ChIP-ChIP_MN9D_Mouse	0.72869	GPM6A;CPE;KCTD15
PRDM16_22522345_ChIP-ChIP_PALATE_MESENCHYMAL_Mouse	0.72869	CACNB4;ADD3
STAT3_1855785_ChIP-Seq_MESCs_Mouse	0.72869	SOX2;EDNRB;CDC42EP4;GFPT2;PCDH18;RABL5;DAK
NR1I2_20693526_ChIP-Seq_LIVER_Mouse	0.72869	NOTCH2;ABLIM1;SDC4;NFIA;NEBL;DENND2A;EPHX1;STK38L;LIFR;MSI2;SOX6
LMO2_26923725_Chip-Seq_MACROPHAGESS_Mouse	0.72869	RBM17;PCBP1;HSPB8;SOX6;BMPR1B;NR3C2
STAT6_21828071_ChIP-Seq_BEAS2B_Human	0.72869	RALBP1
CRX_20693478_ChIP-Seq_ADULT_RETINA_Mouse	0.72869	GPM6A;CTNND2;DPYSL3;MSI2;ATP1B2;SIRT1;JAM2;EHBP1
BCL11B_21912641_ChIP-Seq_STHDH_STRIUM_Mouse	0.72869	FMN2
EZH2_23942234_ChIP-Seq_MYOBLASTS_AND_MYOTUBES_Mouse	0.72869	SOX2;FARP1;DPY19L3;LIFR;SLC16A9;NAT8L;ADCY8;MTA3;MYH10;RABL5;SYBU
PHF8_20622853_ChIP-Seq_HELA_Human	0.72869	NOTCH2;LGI1;RBM17;PRPF38A;AHCYL1;NEBL;EPHX1;PDE4DIP;ATP1A2;FMN2;ADD3;GNG12;SIRT1;PRDX6;ENAH;ABLIM1;NRG3;NFIA;ZNHIT6;TP53BP2;CD44;BMPR1A
SMAD2/3_21741376_ChIP-Seq_ESCs_Human	0.72869	SLC22A4;NANOS1;AHNAK;SPNS3;HSPB8;EPHX1;GMPR;PBXIP1;PRKCA;ZNF45;ATP1B2;ADD3;MLF1;AQP1;DAK;GLIS2;MRAS;NRG3;NFIB;SPOCK2;FBXL4;MFAP3L
EBNA1_20929547_Chip-Seq_RAJI-cells_Human	0.72869	LGI1;SDC2;SPNS3;HSPB8;EPHX1;GOLIM4;AEBP1;ATP1B2;FRY;GRAMD3;GFAP;MRAS;SPOCK2;RNF19A;CD109;KIT;ID4;TXNIP;ITGB8;ZNF853;EZR;CD200
EBF1_22473956_ChIP-Seq_BONE_MARROW_Mouse	0.72869	RFTN2;NOTCH2;RBM17;NEBL;EYA2;UXS1;EPHX1;FMN2;SULF1;PRDX6;MLF1;RYR3;ENAH;RCN1;CACNB4;NFIB;DOK5;RAB23;STOM;BMPR1B;PAM;CD44
PU1_27457419_Chip-Seq_LIVER_Mouse	0.72869	RFTN2;NOTCH2;RBM17;NEBL;EYA2;UXS1;EPHX1;PDE4DIP;ATP1A2;FMN2;SULF1;PRDX6;RYR3;ENAH;RCN1;CACNB4;ZMAT3;DOK5;RAB23;STOM;PAM;CD44
E2F1_18555785_Chip-Seq_ESCs_Mouse	0.72869	NOTCH2;RBM17;NEBL;EYA2;UXS1;EPHX1;PDE4DIP;ATP1A2;FMN2;SULF1;PCDH18;PRDX6;MLF1;RYR3;ENAH;RCN1;CACNB4;DOK5;RAB23;BMPR1B;PAM;CD44
RXR_22158963_ChIP-Seq_LIVER_Mouse	0.72869	SLC22A4;NOTCH2;RBM17;SCARA3;AHCYL1;SDC4;SPNS3;FAM13A;EPHX1;LIFR;CLU;PRDX6;ALDH5A1;DAAM1;NFIB;CDC42EP4;SPIN1;TXNIP;GPD1L;TMEM38B;DIRC2;KCTD15
FOXO1_25302145_ChIP-Seq_T-LYMPHOCYTE_Mouse	0.72869	NOTCH2;SMAD2;RALBP1;AHNAK;PBXIP1;ADD3;GRAMD3;PRDX6;PYGO1;TMEM123;NFIA;FAM173B;ZMAT3;NNT;SPOCK2;RAB23;DPYSL3;TXNIP;DIRC2;EZR;FBXL4;MDM1
ZFX_18555785_ChIP-Seq_MESCs_Mouse	0.72869	AHCYL1;AHNAK;UXS1;MAT2B;FMN2;TOB1;ZMAT3;PCBP1;BOC;STK38L;FBXO8;DIRC2;TMEM38B;MTA3;KPNA3;NANOS1;RBM17;SMAD1;RALBP1;GFPT2;DENND2A;LYSMD4;SIRT1;PRDX6;B3GALTL;RCN1;ALDH5A1;MRAS;MDFIC;PSAT1;GPD1L;IL17D;FBXL4;CRK;STEAP2
MEF2A_21415370_ChIP-Seq_HL-1_Mouse	0.735001	DAAM1;CDH2;NFIB;EHBP1L1;BAALC;LYSMD4;LIFR;ARHGAP5;ADD3;SOX6;PAM;GLIS2
MYC_19915707_ChIP-ChIP_AK7_Human	0.736758	AHCYL1;AHNAK;CAB39L;SDC2;CTNND2;MLC1;ATP1A2;MSI2;FRY;ADD3;GRAMD3;SOX2;ABLIM1;SOX6;KPNA3;JAM2;KLHDC2;FARP1;SCARA3;LMO3;PRKCA;GNG12;CCDC80;NRG3;DAAM1;MDFIC;NFIB;PSAT1;SIDT1;CNTN1;CPE;MEGF9
NACC1_18358816_ChIP-ChIP_MESCs_Mouse	0.743024	ENAH;SOX2;MRAS;EDNRB;PSAT1;KIT;LIFR;GPC4;PFN2
ESR1_20079471_ChIP-ChIP_T-47D_Human	0.748389	NBN;RYR3;CAP2
TP53_23651856_ChIP-Seq_MEFs_Mouse	0.758088	AHNAK;HSPB8;CTNND2;AK1;GOLIM4;GLIS3;PLOD2;MSI2;ADD3;ABLIM1;ZMAT3;RAB23;SPIN1;GPC4;SOX6;MTA3;RFTN2;RBM17;NTRK2;FARP1;GFPT2;EPHX1;PRKCA;GNG12;TIAM1;NFIA;NRG3;CD109;TXNIP;RIN1;EZR;PAM;CD44;MEGF9
CNOT3_19339689_ChIP-ChIP_MESCs_Mouse	0.765585	YAP1;NOTCH2;NEBL;SOX11;MSI2;ADD3;NRG3;PSAT1;ZMAT3;SPOCK2;RAB23;KIT;ID4;CPE;FBXO8;FBXL4;PAM
JARID2_20075857_ChIP-Seq_MESCs_Mouse	0.765585	NTRK2;FARP1;GLIS3;SOX11;LIFR;ADCY8;NR3C2;CACNB4;NRG3;NFIA;SPOCK2;SIDT1;SOX9;NAT8L
ELF1_17652178_ChIP-ChIP_JURKAT_Human	0.771937	NFIA;RABL3
FOXA1_27197147_Chip-Seq_ENDOMETRIOID-ADENOCARCINOMA_Human	0.771937	NOTCH2;ENAH;KLHDC2;ANKRD35;SOX11;EFHC2;SOX9
PKCTHETA_26484144_Chip-Seq_BREAST_Human	0.779639	DOK5;CTNND2;SOX9;TOB1;PRDX6;GPR125
SOX17_20123909_ChIP-Seq_XEN_Mouse	0.779639	SMAD2;LGI1;GFPT2;DENND2A;LIFR;ADD3;ADCY8;SULF1;GRAMD3;GNG12;TMEM123;NFIA;PCBP1;BOC;ID4;BAALC;SLC16A9;SOX6;KPNA3;BMPR1A;MDM1
MECOM_23826213_ChIP-Seq_KASUMI_Mouse	0.779639	KLHDC2;SMAD1;EYA2;CAB39L;SPNS3;GOLIM4;NAP1L3;PDE4DIP;PBXIP1;OCRL;ADD3;PRDX6;DAK;TIAM1;RCN1;PSAT1;ZNHIT6;RNF19A;TXNIP;MYH10;JAM2
REST_21632747_ChIP-Seq_MESCs_Mouse	0.779639	CTNND2;MSI2;MAT2B;FMN2;ARHGAP5;GRAMD3;RYR3;CDH2;ZMAT3;DIRC2;NTRK2;EYA2;SPNS3;DENND2A;PRKCA;B3GALTL;PLCXD3;MRAS;CACNB4;NRG3;DOK5;RRAGD;ID4;BMPR1B;GPR125
SIN3B_21632747_ChIP-Seq_MESCs_Mouse	0.779639	NOTCH2;AHCYL1;ANKRD35;HSPB8;UXS1;AK1;MLC1;ARHGAP5;TOB1;PDLIM3;CDH2;ITGB8;NBN;SOX9;FBXO8;MTA3;MYH10;MFAP3L;KLHDC2;RBM17;SMAD1;EYA2;PRKCA;LIFR;MLF1;ENAH;B3GALTL;IQCK;RSPH1;MRAS;CDH10;CD109;RRAGD;ID4;GPD1L;RIN1;EZR;NAT8L;BMPR1B;CRK;STEAP2;RABL5;KCTD15;MDM1;PFN2
STAT6_20620947_ChIP-Seq_CD4_POS_T_Human	0.782973	KLHDC2;TIAM1;CD109;MSI2;MAT2B;CD44
HIF1A_21447827_ChIP-Seq_MCF-7_Human	0.782973	AHNAK;DAAM1;PLOD2;KCTD15
ERG_21242973_ChIP-ChIP_JURKAT_Human	0.782973	NTRK2;SOX11;FGF2;GPR125
KDM5B_21448134_ChIP-Seq_MESCs_Mouse	0.784221	GPM6A;AHCYL1;XIAP;MSI2;MAT2B;FRY;ARHGAP5;EHBP1;NR3C2;PDLIM3;ZNHIT6;SOX9;SOX6;KPNA3;MYH10;JAM2;MFAP3L;SMAD2;RBM17;SMAD1;PRPF38A;NEBL;GFPT2;SPNS3;LIFR;SULF1;SIRT1;PRDX6;TMEM231;PYGO1;ENAH;TIAM1;DAAM1;PSAT1;CDC42EP4;CPE;AIDA;NAT8L;CRK
SIN3A_21632747_ChIP-Seq_MESCs_Mouse	0.791837	NOTCH2;SMAD2;RBM17;RALBP1;AHNAK;ANKRD35;ENAH;RRAGD;TXNIP;RIN1;STEAP2;MDM1;PFN2
ZNF274_21170338_ChIP-Seq_K562_Hela	0.801818	RBM17;EYA2;ZNF853;STEAP2
GRHL2_25758223_ChIP-Seq_PLACENTA_Mouse	0.805315	NANOS1;SMAD2;SDC2;KIT;ITGB8;ZNF853;IL17D;BMPR1B;FBXL4;PAM;MEGF9
SMC4_20622854_ChIP-Seq_HELA_Human	0.811135	SDC4;AHNAK;CTNND2;SPNS3;AK1;PDE4DIP;LIFR;LYSMD4;GLIS2;PLCXD3;FAM173B;NNT;CDH10;CDC42EP4;TP53BP2;STOM;SOX9;RIN1;CRK;RABL5;MEGF9
CTCF_27219007_Chip-Seq_Bcells_Human	0.811135	NOTCH2;RBM17;PRPF38A;GFPT2;HSPB8;EPHX1;PLOD2;FMN2;RYR3;GFAP;GLIS2;ENAH;SOX2;MRAS;SOX9;IL17D;EZR;CRK;KCTD15;BMPR1A;MDM1
TCF12/HEB_22897851_ChIP-Seq_JUKARTE6-1_Human	0.811135	IL33;RBM17;SMAD1;HSPB8;EPHX1;OCRL;ZNF45;FGF2;PRDX6;AGPAT3;PYGO1;RCN1;MRAS;RAB23;BOC;KIT;RRAGD;SIDT1;PAM;KPNA3;CD44
TRIM28_19339689_ChIP-ChIP_MESCs_Mouse	0.811135	YAP1;NOTCH2;CAB39L;UXS1;MLC1;MSI2;ADD3;TMEM47;SOX2;ZMAT3;SPOCK2;RAB23;NBN;SOX9;NTRK2;RBM17;SMAD1;NEBL;GFPT2;PDE4DIP;LIFR;SOX11;RCN1;MDFIC;KIT;CPE;GPD1L;FBXL4;KCTD15;MEGF9;BMPR1A;PFN2
P63_26484246_Chip-Seq_KERATINOCYTES_Human	0.811135	SCARA3;AHNAK;ATP1A2;LYSMD4;MAT2B;FRY;SULF1;GNG12;GFAP;TMEM123;EDNRB;DAAM1;CDC42EP4;STOM;SPARCL1;GPD1L;RIN1;SOX6;MTA3;CAP2;BMPR1A
CDX2_21402776_ChIP-Seq_INTESTINAL-VILLUS_Mouse	0.811135	RFTN2;UXS1;EPHX1;PRKCA;ATP1A2;MSI2;FMN2;SULF1;TOB1;SIRT1;PRDX6;AGPAT3;ENAH;DAAM1;SPOCK2;RAB23;CDC42EP4;SLC16A9;PAM;MYH10;MDM1
SMAD4_21741376_ChIP-Seq_EPCs_Human	0.811135	YAP1;SMAD2;FARP1;RALBP1;PRPF38A;NEBL;UXS1;LIFR;FRY;MLF1;TIAM1;ARHGAP32;PLCXD3;SPOCK2;BOC;TP53BP2;ID4;STK38L;SOX9;MTA3;CAP2
P300_18555785_Chip-Seq_ESCs_Mouse	0.811135	NOTCH2;RBM17;NEBL;EYA2;UXS1;HSPB8;EPHX1;PDE4DIP;ATP1A2;FMN2;SULF1;PRDX6;RYR3;ENAH;RCN1;CACNB4;DOK5;RAB23;ZNHIT6;PAM;CD44
ESRRB_18555785_Chip-Seq_ESCs_Mouse	0.811135	NOTCH2;RBM17;AHCYL1;SDC4;NEBL;EYA2;UXS1;EPHX1;GOLIM4;ATP1A2;FMN2;SULF1;PRDX6;RYR3;ENAH;RCN1;CACNB4;DOK5;RAB23;PAM;CD44
UBF1/2_26484160_Chip-Seq_HMEC-DERIVED_Human	0.811135	NANOS1;NOTCH2;AHNAK;LMO3;EPHX1;LYSMD4;MAT2B;ADD3;ADCY8;GNG12;TOB1;SIRT1;GFAP;ENAH;NFIA;CDH2;SPOCK2;CDC42EP4;CNTN1;TP53BP2;CD44
LDB1_21186366_ChIP-Seq_BM-HSCs_Mouse	0.811135	NANOS1;NOTCH2;RALBP1;PRPF38A;LMO3;GFPT2;GOLIM4;OCRL;EHBP1;MLF1;AQP1;PLCXD3;CDC42EP4;PCBP1;BOC;EHBP1L1;RRAGD;SPARCL1;RIN1;MTA3;CRK
ETS1_21867929_ChIP-Seq_TH2_Mouse	0.811135	AHNAK;PON2;SPNS3;DENND2A;EPHX1;ARHGAP5;ADCY8;GLIS2;B3GALTL;ENAH;TMEM123;ALDH5A1;FAM173B;MDFIC;EHBP1L1;RABL3;TXNIP;NBN;DIRC2;MTA3;MDM1
SMC1_22415368_ChIP-Seq_MEFs_Mouse	0.811135	NTRK2;IL33;RALBP1;AHNAK;PRKCA;SOX11;DAK;GLIS2;ENAH;SOX2;DAAM1;CDH10;CDC42EP4;BOC;EHBP1L1;BAALC;SOX9;RIN1;SOX6;PAM;KPNA3
KLF6_26769127_Chip-Seq_PDAC-Cell_line_Human	0.811135	YAP1;KLHDC2;NANOS1;AHNAK;ANKRD35;HSPB8;EPHX1;PBXIP1;PRKCA;GNG12;SIRT1;PRDX6;ENAH;NRG3;EHBP1L1;TP53BP2;TXNIP;STK38L;EZR;GPR125;BMPR1A
SOX3_22085726_ChIP-Seq_NPCs_Mouse	0.811135	SLC22A4;FARP1;FZD3;AHNAK;CAB39L;CTNND2;AK1;EPHX1;PDE4DIP;PLOD2;PRKCA;LIFR;FMN2;ADD3;CLU;DAK;SOX2;PDLIM3;CDH2;KIT;BMPR1A
MYC_27129775_Chip-Seq_CORNEA_Mouse	0.811135	SCARA3;AK1;MSI2;MAT2B;ADD3;TOB1;GLIS2;SOX2;PLCXD3;DAAM1;MDFIC;CDC42EP4;PCBP1;KIT;RRAGD;IL17D;MTA3;JAM2;KCTD15;CD44;CAP2
PBX1_22567123_ChIP-ChIP_OVCAR3_Human	0.814306	LGI1;GPM6A;FZD3;ANKRD35;LMO3;PDE4DIP;PBXIP1;MSI2;EHBP1;TIAM1;AR;CACNB4;NRG3;DOK5;SPOCK2;CNTN1;STOM;TXNIP;STK38L;SERPING1;SOX9;FBXO8;DIRC2;MFAP3L
SALL4_22934838_ChIP-ChIP_CD34+_Human	0.822065	LGI1;AHCYL1;CTNND2;ARHGAP5;SULF1;EDNRB;NFIA;NFIB;DPYSL3;ID4;SERPING1;DIRC2;MTA3;CD44;MFAP3L
IRF1_21803131_ChIP-Seq_MONOCYTES_Human	0.825452	SDC2;SULF1;PCDH18;AQP1
HNF4A_19761587_ChIP-ChIP_CACO-2_Human	0.825452	NOTCH2;SLC22A4;ABLIM1;ALDH5A1;SDC4;PON2;LMO3;RABL3;ITGB8;ADD3;TMEM38B;STEAP2
SCL_19346495_ChIP-Seq_HPC-7_Human	0.836815	SDC4;GRAMD3;MDM1
NANOG_18358816_ChIP-ChIP_MESCs_Mouse	0.836815	LGI1;SDC2;ENAH;SOX2;RCN1;DOK5;NFIB;PSAT1;CDC42EP4;DPYSL3;KIT;SPARCL1;GPC4
NANOG_21062744_ChIP-ChIP_HESCs_Human	0.837516	SMAD2;RCN1;ABLIM1;MRAS;CDC42EP4;GPC4;MAT2B;FBXL4;EHBP1
ESRRB_18555785_ChIP-Seq_MESCs_Mouse	0.839539	KLHDC2;CTNND2;MAT2B;SULF1;TOB1;PRDX6;ALDH5A1;NNT;RAB23;RRAGD;SPIN1;CPE;TMEM38B;MTA3;CRK
NANOG_16518401_ChIP-PET_MESCs_Mouse	0.84031	NOTCH2;SDC4;CAB39L;HSPB8;PON2;GLIS3;AK4;KLHL13;ADCY8;SOX2;PDLIM3;SPOCK2;BOC;SLC16A9;GPC4;SOX6;MTA3;JAM2;CAP2;SMAD1;RALBP1;EYA2;SULF1;ENAH;AR;RCN1;MRAS;NFIB;DOK5;CDC42EP4;CPE;SERPING1;RIN1;BMPR1B;STEAP2;BMPR1A
EKLF_21900194_ChIP-Seq_ERYTHROCYTE_Mouse	0.84031	SLC22A4;SMAD2;PRPF38A;GMPR;ATP1B2;ADD3;PRDX6;GFAP;AQP1;PSAT1;EHBP1L1;SOX6;CD44
BCAT_22108803_ChIP-Seq_LS180_Human	0.846829	ARHGAP32;NFIA;NRG3;NFIB;DOK5;LYSMD4;ADD3
KLF4_18555785_ChIP-Seq_MESCs_Mouse	0.860274	SLC22A4;NOTCH2;RASL12;AHCYL1;SDC4;UXS1;MSI2;TOB1;GLIS2;TMEM123;RAB23;PCBP1;SPIN1;SLC16A9;GPC4;MFAP3L;SMAD2;FARP1;RALBP1;SIRT1;RCN1;CD109;TXNIP;GPD1L;BMPR1A
BMI1_23680149_ChIP-Seq_NPCS_Mouse	0.866295	TMEM47;AHNAK;ID4;NAP1L3;TXNIP;PDE4DIP;PCDH18;STEAP2;SYBU;MLF1;NR3C2
EGR1_19032775_ChIP-ChIP_M12_Human	0.867488	HERC5;SMAD1;SOX11
TCF4_18268006_ChIP-ChIP_LS174T_Human	0.867488	ENAH;PCBP1;TXNIP;SOX11;PRDX6
HTT_18923047_ChIP-ChIP_STHdh_Human	0.867488	GPM6A;PLCXD3;SPOCK2;SOX11;BMPR1B;CLU
TP63_19390658_ChIP-ChIP_HaCaT_Human	0.867488	NFIB;CTNND2
THRA_23701648_ChIP-Seq_CEREBELLUM_Mouse	0.867488	SOX11;FGF2
CEBPB_23403033_ChIP-Seq_LIVER_Mouse	0.867488	SYNPO2;ZNHIT6;HSPB8;AK4
SOX2_19030024_ChIP-ChIP_MESCs_Mouse	0.867488	YAP1;SOX2;SMAD2;GPM6A;RCN1;NFIB;MAT2B;JAM2;GLIS2
RUNX1_26923725_Chip-Seq_MACROPHAGESS_Mouse	0.867488	LIFR
GLI1_17442700_ChIP-ChIP_MESCs_Mouse	0.867488	FHL1
EGR1_19374776_ChIP-ChIP_THP-1_Human	0.867488	BAALC
AHR_22903824_ChIP-Seq_MCF-7_Human	0.867488	TMEM123;NNT;EYA2;ID4;SIDT1;XIAP;MSI2
FOXP2_23625967_ChIP-Seq_PFSK-1_AND_SK-N-MC_Human	0.867488	SLC22A4;KLHDC2;RBM17;AHNAK;NFIA;ANKRD35;EHBP1L1;GPC4;PRDX6
NR0B1_18358816_ChIP-ChIP_MESCs_Mouse	0.867488	AK1;PBXIP1;LIFR;MSI2;SULF1;TOB1;PRDX6;GLIS2;ENAH;SOX2;RCN1;MRAS;NFIB;CDC42EP4;KIT;GPC4;CRK
SREBP2_21459322_ChIP-Seq_LIVER_Mouse	0.867488	YAP1;RASL12;TMEM123;MDFIC;PON2;AK1;ATP1A2;MTA3;FGF2;SYBU;EHBP1
TCFCP2L1_18555785_ChIP-Seq_MESCs_Mouse	0.867488	RALBP1;SDC4;AHNAK;HSPB8;MAT2B;TMEM47;RCN1;DAAM1;DOK5;CDC42EP4;KIT;RABL3;SPIN1;STK38L;SLC16A9;RIN1;TMEM38B;DIRC2;FBXL4;RABL5
DACH1_20351289_ChIP-Seq_MDA-MB-231_Human	0.867488	YAP1;SLC22A4;AHCYL1;SDC4;DENND2A;PRKCA;SIRT1;GFAP;DAK;B3GALTL;ZMAT3;CDC42EP4;PCBP1;TP53BP2;TXNIP;BMPR1A;PFN2
E2F1_20622854_ChIP-Seq_HELA_Human	0.867488	NANOS1;FARP1;AHNAK;PON2;HSPB8;AK1;EPHX1;GMPR;MLF1;GLIS2;ENAH;MRAS;NFIB;ZMAT3;EHBP1L1;RRAGD;TP53BP2;CRK;STEAP2;MDM1
GATA3_26560356_Chip-Seq_TH1_Human	0.867488	KLHDC2;RASL12;RBM17;SMAD1;RALBP1;PON2;GOLIM4;XIAP;PDE4DIP;MSI2;PYGO1;RSPH1;RCN1;RAB23;CD109;SIDT1;SLC16A9;IL17D;STEAP2;BMPR1A
CTCF_20526341_ChIP-Seq_ESCs_Human	0.867488	NOTCH2;RBM17;PRPF38A;AHCYL1;AHNAK;EPHX1;AKR1C2;PBXIP1;GNG12;SIRT1;AGPAT3;CLEC4A;ALDH5A1;MRAS;BOC;KIT;EHBP1L1;RRAGD;RIN1;NAT8L
P63_20808887_ChIP-Seq_KERATINOCYTES_Human	0.867488	SLC22A4;SMAD2;FZD3;PRPF38A;AHNAK;EYA2;FAM13A;AK1;EPHX1;XIAP;PBXIP1;FGF2;CLEC4A;ABLIM1;DAAM1;ZMAT3;PCBP1;RNF19A;SOX9;MDM1
GATA3_21878914_ChIP-Seq_MCF-7_Human	0.867488	LGI1;RBM17;ANKRD35;EYA2;FAM13A;AK1;PBXIP1;LIFR;MSI2;RYR3;TMEM123;NFIB;TSPAN6;CD109;RRAGD;CNTN1;SPARCL1;GPD1L;NBN;MTA3
NEUROD2_26341353_ChIP-Seq_CORTEX_Mouse	0.867488	NTRK2;AHCYL1;AHNAK;CAB39L;PRKCA;MSI2;AEBP1;ATP1B2;AGPAT3;GFAP;DAK;GLIS2;RAB23;CDC42EP4;BOC;RRAGD;SPIN1;SLC16A9;NAT8L;JAM2
SOX2_21211035_ChIP-Seq_LN229_Human	0.867488	NANOS1;SMAD2;GPM6A;SMAD1;SDC2;EPHX1;AEBP1;MAT2B;AGPAT3;TMEM231;B3GALTL;EDNRB;NNT;SPOCK2;RABL3;STOM;ZNF853;SOX9;RABL5;MFAP3L
GATA2_21186366_ChIP-Seq_BM-HSCs_Mouse	0.867488	ACSS3;GFPT2;GMPR;PRKCA;SOX11;MSI2;AEBP1;MAT2B;ARHGAP5;TOB1;SIRT1;EHBP1;AGPAT3;DAAM1;SPOCK2;CDC42EP4;SLC16A9;MYH10;CAP2;MDM1
CRX_20693478_ChIP-Seq_RETINA_Mouse	0.867488	SLC22A4;RFTN2;ACSS3;UXS1;GFPT2;EPHX1;ATP1A2;MAT2B;FMN2;SULF1;SIRT1;PRDX6;AGPAT3;ENAH;SPOCK2;RAB23;SLC16A9;PAM;MYH10;MDM1
TAF2_19829295_ChIP-Seq_ESCs_Human	0.867488	RFTN2;RBM17;SMAD1;AHNAK;NEBL;CAB39L;SDC2;GMPR;ATP1A2;ZNF45;SIRT1;CLEC4A;NRG3;SPOCK2;TP53BP2;STOM;FBXL4;KPNA3;JAM2;MFAP3L
OLIG2_26023283_ChIP-Seq_AINV15_Mouse	0.867488	EYA2;TOB1;RYR3;GLIS2;SOX2;PDLIM3;EDNRB;DAAM1;DOK5;NNT;SPOCK2;CDC42EP4;TXNIP;ITGB8;SPARCL1;BAALC;SERPING1;SOX9;TMEM38B;JAM2
GATA3_21867929_ChIP-Seq_TH1_Mouse	0.867488	SCARA3;AHCYL1;CTNND2;DENND2A;ATP1B2;KLHL13;SULF1;TOB1;RYR3;GLIS2;B3GALTL;ALDH5A1;CACNB4;CDH10;CNTN1;CPE;GPC4;NBN;RIN1;MYH10
SOX2_18555785_Chip-Seq_ESCs_Mouse	0.867488	RBM17;NEBL;EYA2;SYNPO2;UXS1;EPHX1;ATP1A2;FMN2;SULF1;PRDX6;RYR3;ENAH;RCN1;CACNB4;DOK5;RAB23;ZNHIT6;BMPR1B;PAM;CD44
SOX11_22085726_ChIP-Seq_ESNs_Mouse	0.867488	NOTCH2;RBM17;RALBP1;AHCYL1;CAB39L;CTNND2;DENND2A;ATP1A2;LYSMD4;AGPAT3;ALDH5A1;EDNRB;FAM173B;DAAM1;SPOCK2;CDC42EP4;SIDT1;TXNIP;SPARCL1;SOX9
FOXH1_21741376_ChIP-Seq_EPCs_Human	0.867488	YAP1;IL33;PRPF38A;NEBL;EYA2;AK1;PRKCA;FRY;FGF2;NR3C2;NFIA;SPOCK2;RNF19A;BOC;SIDT1;SPIN1;STK38L;SPARCL1;EFHC2;MTA3
SOX2_27498859_Chip-Seq_STOMACH_Mouse	0.867488	ANKRD35;EYA2;PON2;DENND2A;FAM13A;GOLIM4;PRKCA;FRY;GRAMD3;TOB1;PRDX6;SOX2;PDLIM3;NFIA;NFIB;RNF19A;SPIN1;STOM;MEGF9;MDM1
SOX3_22085726_ChIP-Seq_MUSCLE_Mouse	0.867488	KLHDC2;SDC4;AHNAK;NEBL;NAP1L3;ATP1B2;AQP1;SOX2;PLCXD3;NFIA;DAAM1;ZNHIT6;RNF19A;EHBP1L1;RABL3;SPARCL1;RIN1;TMEM38B;IL17D;MEGF9
BRD4_27068464_Chip-Seq_AML-cells_Mouse	0.867488	SLC22A4;SDC4;SPNS3;MAT2B;GNG12;TOB1;SIRT1;TIAM1;RSPH1;CCDC80;RAB23;CDC42EP4;PCBP1;EHBP1L1;STOM;TXNIP;MTA3;CRK;CD44;BMPR1A
SRY_25088423_ChIP-ChIP_EMBRYONIC_GONADS_Mouse	0.867488	ACSS3;HSPB8;AK4;CLU;FGF2;EDNRB;ZMAT3;SPOCK2;DPYSL3;GPC4;SOX6;MTA3;MYH10;NTRK2;RALBP1;GFPT2;PDE4DIP;LYSMD4;SOX11;SIRT1;GFAP;AR;MRAS;NRG3;NFIB;CDC42EP4;CD109;EHBP1L1;SIDT1;RIN1;CRK
PPARG_20176806_ChIP-Seq_MACROPHAGES_Mouse	0.881954	SMAD1;EYA2;CTNND2;NAP1L3;ATP1A2;SULF1;TMEM231;CCDC80;DIRC2;SOX6;KPNA3;PAM;CD44;MDM1
GATA2_21571218_ChIP-Seq_MEGAKARYOCYTES_Human	0.893859	DPY19L3;AHNAK;GMPR;TXNIP;PDE4DIP;MSI2;CLU;EHBP1;CD44;AGPAT3;CAP2
TFEB_21752829_ChIP-Seq_HELA_Human	0.89808	SOX2;ZNHIT6;FAM13A;TXNIP;PDE4DIP;PBXIP1;SIRT1;MEGF9
E2F1_17053090_ChIP-ChIP_MCF-7_Human	0.89808	KLHDC2;RALBP1;SDC4;LMO3;FHL1;NAP1L3;ZNF45;MSI2;TOB1;AGPAT3;TIAM1;DAAM1;CNTN1;EFHC2;MYH10;JAM2;MDM1
ELK1_19687146_ChIP-ChIP_HELA_Human	0.905961	ENAH;AHNAK;NFIA;NNT;ZMAT3;ITGB8;ZNF45;GRAMD3;PFN2
ER_23166858_ChIP-Seq_MCF-7_Human	0.912059	DOK5;EYA2;PON2;RNF19A;SOX11;MSI2;NBN;STEAP2;RABL5
MYB_21317192_ChIP-Seq_ERMYB_Mouse	0.916	SLC22A4;IL33;RALBP1;DAAM1;GFPT2;GNG12;TOB1;MFAP3L;PFN2
TCFAP2C_20176728_ChIP-ChIP_TROPHOBLAST_STEM_CELLS_Mouse	0.927206	SDC4;CAB39L;GLIS3;AEBP1;TOB1;ABLIM1;NNT;SOX9;DIRC2;MTA3;MYH10;JAM2;KLHDC2;FARP1;RALBP1;DENND2A;PDE4DIP;LIFR;GNG12;PRDX6;MRAS;DPY19L3;PAM;KCTD15;BMPR1A;MDM1
PPARD_23208498_ChIP-Seq_MDA-MB-231_Human	0.930123	CDH2;ZNHIT6;SPNS3;TXNIP;GRAMD3
TRIM28_21343339_ChIP-Seq_HEK293_Human	0.93628	PLOD2
MYC_18940864_ChIP-ChIP_HL60_Human	0.939618	CDH2;RNF19A;TXNIP;FMN2;SOX9;NAT8L;CD44
STAT3_19079543_ChIP-ChIP_MESCs_Mouse	0.939618	SMAD2;LGI1;ABLIM1;RALBP1;CCDC80;MRAS;EPHX1;GLIS3;JAM2
FOXP2_21765815_ChIP-ChIP_NEURO2A_Mouse	0.939618	NOTCH2;KLHDC2;NTRK2;GPM6A;EDNRB;NFIA;PON2;BOC;MAT2B;TMEM38B;FBXL4
NCOR_22424771_ChIP-Seq_293T_Human	0.939618	FARP1;ACSS3;PRPF38A;AHNAK;LMO3;UXS1;GMPR;LYSMD4;ZNF45;ARHGAP5;SULF1;GRAMD3;GLIS2;DPY19L3;NNT;FBXL4;STEAP2;MYH10;KCTD15
MYB_26560356_Chip-Seq_TH1_Human	0.939618	NANOS1;NOTCH2;LGI1;RALBP1;SDC4;UXS1;PBXIP1;ARHGAP5;TOB1;PRDX6;NR3C2;TMEM123;CCDC80;DAAM1;MDFIC;EHBP1L1;TP53BP2;BAALC;CD44
CMYC_18555785_Chip-Seq_ESCs_Mouse	0.939618	RBM17;NEBL;EYA2;UXS1;EPHX1;ATP1A2;FMN2;SULF1;PRDX6;RYR3;ENAH;SOX2;RCN1;CACNB4;DOK5;RAB23;ZNHIT6;PAM;CD44
STAT3_18555785_Chip-Seq_ESCs_Mouse	0.939618	RBM17;PRPF38A;AHCYL1;EYA2;UXS1;EPHX1;ATP1A2;FMN2;SULF1;PRDX6;RYR3;ENAH;RCN1;CACNB4;DOK5;RAB23;STOM;PAM;CD44
ATF3_27146783_Chip-Seq_COLON_Human	0.939618	YAP1;NOTCH2;RBM17;SMAD1;SYNPO2;UXS1;PLOD2;MSI2;CLU;FGF2;PRDX6;EHBP1;ENAH;RCN1;PCBP1;ITGB8;NBN;IL17D;MYH10
LUZP1_20508642_ChIP-Seq_ESCs_Mouse	0.939618	SLC22A4;ACSS3;GFPT2;SPNS3;PRKCA;MSI2;AEBP1;MAT2B;ARHGAP5;TOB1;SIRT1;EHBP1;AGPAT3;SPOCK2;CDC42EP4;SLC16A9;CRK;MYH10;MDM1
KDM2B_26808549_Chip-Seq_DND41_Human	0.939618	NANOS1;AHCYL1;AHNAK;PDE4DIP;TOB1;EHBP1;GLIS2;ENAH;TMEM123;RCN1;DAAM1;CDH2;SPOCK2;RNF19A;EHBP1L1;SIDT1;TP53BP2;AIDA;CD44
FLI1_26923725_Chip-Seq_MACROPHAGESS_Mouse	0.939618	KLHDC2;NTRK2;IL33;HSPB8;PBXIP1;PRKCA;AEBP1;ATP1B2;GRAMD3;SIRT1;GLIS2;TMEM123;ABLIM1;ZMAT3;CDC42EP4;STOM;GPD1L;NAT8L;PFN2
NMYC_18555785_Chip-Seq_ESCs_Mouse	0.939618	RBM17;AHCYL1;NEBL;EYA2;UXS1;EPHX1;ATP1A2;FMN2;SULF1;PRDX6;RYR3;ENAH;RCN1;CACNB4;DOK5;RAB23;ZNHIT6;PAM;CD44
STAT1_17558387_ChIP-Seq_HELA_Human	0.939618	KLHDC2;NANOS1;LGI1;RBM17;SYNPO2;SDC2;UXS1;FGF2;B3GALTL;PDLIM3;MRAS;EDNRB;PSAT1;ZMAT3;SPOCK2;SPIN1;CPE;BAALC;PFN2
SOX6_21985497_ChIP-Seq_MYOTUBES_Mouse	0.939618	SLC22A4;RFTN2;UXS1;EPHX1;ATP1A2;SOX11;FMN2;SULF1;SIRT1;PRDX6;EHBP1;AGPAT3;ENAH;SPOCK2;RAB23;SLC16A9;PAM;CRK;MYH10
CREB1_26743006_Chip-Seq_LNCaP-abl_Human	0.939618	NANOS1;RBM17;SMAD1;DENND2A;PDE4DIP;SULF1;GNG12;TOB1;CLU;PRDX6;EHBP1;TMEM231;NFIA;NFIB;ZNHIT6;KIT;ZNF853;IL17D;CD44
GATA3_21867929_ChIP-Seq_CD8_Mouse	0.939618	GPM6A;SMAD1;AHCYL1;EYA2;GLIS3;ATP1A2;MSI2;PRDX6;ENAH;SOX2;TIAM1;NFIA;CDC42EP4;PCBP1;EHBP1L1;STOM;BAALC;NBN;RABL5
JUND_26020271_ChIP-Seq_SMOOTH_MUSCLE_Human	0.939618	YAP1;SMAD2;SDC4;HSPB8;FAM13A;GMPR;PDE4DIP;CLU;FGF2;MLF1;B3GALTL;DOK5;CD109;TP53BP2;STK38L;RIN1;TMEM38B;PAM;CD200
KDM2B_26808549_Chip-Seq_SIL-ALL_Human	0.939618	NOTCH2;AHCYL1;AHNAK;MAT2B;ADD3;TOB1;SIRT1;RYR3;GLIS2;B3GALTL;TMEM123;NFIA;DAAM1;CDC42EP4;RNF19A;EHBP1L1;CRK;KCTD15;CD44
KLF4_18555785_Chip-Seq_ESCs_Mouse	0.939618	NOTCH2;RBM17;NEBL;EYA2;UXS1;EPHX1;ATP1A2;FMN2;SULF1;PRDX6;RYR3;ENAH;SOX2;RCN1;CACNB4;DOK5;RAB23;PAM;CD44
PU_27001747_Chip-Seq_BMDM_Mouse	0.939618	SLC22A4;RFTN2;UXS1;EPHX1;MSI2;ATP1B2;MAT2B;GRAMD3;SIRT1;PRDX6;AGPAT3;GFAP;ENAH;NNT;RAB23;CDC42EP4;RRAGD;PAM;CRK
NANOG_18555785_ChIP-Seq_MESCs_Mouse	0.945856	SOX2;RCN1;CDC42EP4;JAM2;KCTD15
KLF4_18358816_ChIP-ChIP_MESCs_Mouse	0.948746	RFTN2;RALBP1;AHNAK;GFPT2;HSPB8;AK1;PDE4DIP;DAK;SOX2;TIAM1;RCN1;CD109;KIT;TXNIP;GPD1L;JAM2
NFE2_27457419_Chip-Seq_LIVER_Mouse	0.951428	ENAH;RFTN2;UXS1;RAB23;EPHX1;FMN2;SULF1;PRDX6;PAM
TP53_22127205_ChIP-Seq_IMR90_Human	0.954556	YAP1;IL33;GPM6A;RCN1;ZMAT3;RRAGD;STOM;MSI2;GNG12
KLF4_19030024_ChIP-ChIP_MESCs_Mouse	0.956245	SLC22A4;PDE4DIP;GNG12;PRDX6;SOX2;RCN1;NFIA;NFIB;PCBP1;TXNIP;SOX9;JAM2;KCTD15;MEGF9
BMI1_19503595_ChIP-Seq_MEFsC_Mouse	0.960596	EYA2;GOLIM4;MLC1;SLC16A9;ATP1B2;STEAP2
SUZ12_27294783_Chip-Seq_NPCs_Mouse	0.967894	ENAH;RFTN2;UXS1;RAB23;FMN2;SULF1;PRDX6;PAM
GATA1_26923725_Chip-Seq_HPCs_Mouse	0.97015	PSAT1;SOX11
PDX1_19855005_ChIP-ChIP_MIN6_Mouse	0.97015	PDLIM3;PRPF38A;ALDH5A1;NAP1L3;BAALC;GRAMD3
EZH2_27304074_Chip-Seq_ESCs_Mouse	0.97015	NTRK2;NFIA;CDH2;NFIB;CTNND2;SOX9;ADCY8;SOX6
TAF7L_23326641_ChIP-Seq_C3H10T1-2_Mouse	0.976949	CCDC80;MDFIC;BOC;AK1;TXNIP;ARHGAP5;TOB1;AGPAT3
VDR_23401126_ChIP-Seq_LCL-AND-THP1_Human	0.976949	GOLIM4;PDE4DIP
CDKN2AIP_20523734_ChIP-Seq_CORTICAL_Neurons	0.976949	DAK
YY1_21170310_ChIP-Seq_MESCs_Mouse	0.976949	CD109;PCBP1;RABL3;MEGF9
ELK4_26923725_Chip-Seq_MESODERM_Mouse	0.976949	NTRK2;FZD3;CD109;MEGF9
DROSHA_22980978_ChIP-Seq_HELA_Human	0.976949	PSAT1;CTNND2;AK4;FRY
SMARCA4_20176728_ChIP-ChIP_TSCs_Mouse	0.976949	SMAD2;ABLIM1;RALBP1;NEBL;ZMAT3;GLIS3;SPARCL1;TXNIP;EHBP1;BMPR1A
ELK1_22589737_ChIP-Seq_MCF10A_Human	0.976949	ENAH;GPM6A;TSPAN6;STK38L;PDE4DIP;ZNF45;CD44;NR3C2
GATA2_19941826_ChIP-Seq_K562_Human	0.976949	SDC4;AHNAK;NEBL;EYA2;GOLIM4;GMPR;PDE4DIP;AGPAT3;AQP1;DAK;NFIA;DPY19L3;NFIB;DOK5;CDC42EP4;EHBP1L1;ID4;EFHC2;EZR;MYH10;MFAP3L;MDM1
AUTS2_25519132_ChIP-Seq_293T-REX_Human	0.976949	RCN1;NFIB;SYNPO2;SDC2;TMEM38B;PRDX6;PAM;NR3C2;AQP1
EOMES_20176728_ChIP-ChIP_TSCs_Mouse	0.976949	NOTCH2;SDC4;CAB39L;GLIS3;MSI2;EHBP1;TMEM123;ABLIM1;MRAS;EDNRB;MDFIC;PCBP1;ID4;TXNIP;BMPR1A;PFN2
PCGF4_22325352_ChIP-Seq_293T-Rex_Human	0.976949	NOTCH2;PRPF38A;AHCYL1;UXS1;PDE4DIP;SOX11;FMN2;GNG12;PRDX6;EHBP1;ENAH;CACNB4;NFIA;ZNHIT6;BOC;TP53BP2;AIDA;MTA3
GATA3_26560356_Chip-Seq_TH2_Human	0.976949	IL33;RBM17;SMAD1;RALBP1;SPNS3;PBXIP1;AEBP1;TOB1;CLU;AGPAT3;ARHGAP32;TMEM123;TXNIP;NBN;KPNA3;MYH10;CD44;GPR125
OCT4_20526341_ChIP-Seq_ESCs_Human	0.976949	NOTCH2;RASL12;SYNPO2;UXS1;HSPB8;TOB1;GLIS2;CLEC4A;PDLIM3;CCDC80;ZMAT3;NNT;DPYSL3;RABL3;TP53BP2;TXNIP;BMPR1B;KCTD15
SA1_27219007_Chip-Seq_ERYTHROID_Human	0.976949	AHCYL1;AHNAK;SDC2;PBXIP1;ATP1A2;FMN2;GNG12;ENAH;TMEM123;CCDC80;NFIA;SPOCK2;ZNHIT6;SIDT1;AIDA;RIN1;NAT8L;KCTD15
IRF8_27001747_Chip-Seq_BMDM_Mouse	0.976949	IL33;RBM17;SMAD1;FZD3;AHCYL1;ANKRD35;UXS1;SPNS3;OCRL;MAT2B;HERC5;RSPH1;PDLIM3;DPY19L3;BOC;STOM;MTA3;RABL5
ERA_21632823_ChIP-Seq_H3396_Human	0.976949	RFTN2;ACSS3;EYA2;FHL1;OCRL;MSI2;FMN2;GNG12;DAK;MRAS;RAB23;CDC42EP4;RNF19A;RRAGD;CNTN1;SPARCL1;GPD1L;STEAP2
CTCF_21964334_Chip-Seq_Bcells_Human	0.976949	SMAD2;RBM17;PRPF38A;AHCYL1;ANKRD35;TOB1;AQP1;GLIS2;B3GALTL;ENAH;SOX2;ALDH5A1;ZMAT3;EHBP1L1;TP53BP2;TXNIP;SOX9;IL17D
FLI1_26923725_Chip-Seq_HEMOGENIC-ENDOTHELIUM_Mouse	0.976949	YAP1;AHNAK;EPHX1;PBXIP1;LIFR;ATP1B2;TIAM1;TMEM123;PCBP1;RNF19A;BOC;KIT;EHBP1L1;RABL3;GPD1L;NAT8L;CD44;PFN2
CHD1_26751641_Chip-Seq_LNCaP_Human	0.976949	RFTN2;NOTCH2;RBM17;AHNAK;SDC2;GNG12;TOB1;SIRT1;AGPAT3;ENAH;RCN1;NFIA;TXNIP;CRK;KPNA3;STEAP2;KCTD15;BMPR1A
ETV1_20927104_ChIP-Seq_GIST48_Human	0.976949	NOTCH2;PRPF38A;AHCYL1;ANKRD35;UXS1;EPHX1;PDE4DIP;SOX11;FMN2;GNG12;PRDX6;EHBP1;ENAH;CACNB4;NFIA;ZNHIT6;TP53BP2;MTA3
SMAD1_18555785_Chip-Seq_ESCs_Mouse	0.976949	RBM17;SDC4;EYA2;UXS1;EPHX1;ATP1A2;FMN2;SULF1;PRDX6;RYR3;ENAH;RCN1;CACNB4;RAB23;STOM;TXNIP;PAM;CD44
CTCF_18555785_Chip-Seq_ESCs_Mouse	0.976949	RBM17;NEBL;EYA2;UXS1;EPHX1;ATP1A2;FMN2;SULF1;PRDX6;RYR3;ENAH;SOX2;RCN1;DOK5;RAB23;STOM;PAM;CD44
SUZ12_18555785_Chip-Seq_ESCs_Mouse	0.976949	RBM17;NEBL;EYA2;UXS1;EPHX1;ATP1A2;FMN2;SULF1;PRDX6;RYR3;ENAH;RCN1;CACNB4;DOK5;RAB23;FBXL4;PAM;CD44
GATA1_22383799_ChIP-Seq_G1ME_Mouse	0.976949	KLHDC2;RALBP1;EPHX1;ATP1B2;CLU;PRDX6;TMEM231;GFAP;ALDH5A1;DAAM1;MDFIC;EHBP1L1;STOM;AIDA;NBN;EZR;FBXL4;CAP2
OCT4_18555785_Chip-Seq_ESCs_Mouse	0.976949	RBM17;NEBL;EYA2;UXS1;EPHX1;ATP1A2;FMN2;SULF1;PRDX6;RYR3;ENAH;RCN1;DOK5;RAB23;BMPR1B;PAM;CD44;PFN2
TCF7_22412390_ChIP-Seq_EML_Mouse	0.976949	NOTCH2;SMAD2;RALBP1;AHNAK;LYSMD4;GNG12;TOB1;GLIS2;B3GALTL;TIAM1;TMEM123;PCBP1;TXNIP;NAT8L;IL17D;CRK;KPNA3;KCTD15
OCT4_21477851_ChIP-Seq_ESCs_Mouse	0.976949	RFTN2;UXS1;EPHX1;ATP1A2;MAT2B;FMN2;SULF1;SIRT1;PRDX6;AGPAT3;ENAH;PLCXD3;SPOCK2;RAB23;SLC16A9;SOX9;PAM;MDM1
TET1_21490601_ChIP-Seq_MESCs_Mouse	0.976949	SLC22A4;NOTCH2;SMAD1;PRPF38A;SDC4;AHNAK;CAB39L;HSPB8;DENND2A;AK1;PDE4DIP;SOX2;IQCK;CACNB4;EDNRB;RIN1;NAT8L;DIRC2
FOXA1_26743006_Chip-Seq_LNCaP-abl_Human	0.976949	YAP1;SMAD2;SMAD1;AHNAK;NEBL;SYNPO2;PDE4DIP;GNG12;TOB1;SIRT1;DAK;TMEM123;DPY19L3;ZNHIT6;AIDA;KPNA3;STEAP2;CD44
NR1H3_23393188_ChIP-Seq_ATHEROSCLEROTIC-FOAM_Human	0.978598	TMEM123;ZMAT3;CDC42EP4;PRKCA;JAM2
HSF1_23293686_ChIP-Seq_STHDH_STRIATAL_Mouse	0.979302	B3GALTL;ENAH;ABLIM1;SDC4;HSPB8;TXNIP;SERPING1;PLOD2;CLU;GPR125
REST_19997604_ChIP-ChIP_NEURONS_Mouse	0.979302	YAP1;NOTCH2;SMAD2;RBM17;GPM6A;RALBP1;UXS1;CTNND2;NAP1L3;KLHL13;TOB1;CDH2;PSAT1;CNTN1;STK38L;FBXO8;IL17D;FBXL4;MYH10
TFAP2A_17053090_ChIP-ChIP_MCF-7_Human	0.979302	FARP1;SDC4;AHNAK;EYA2;LMO3;GFAP;CLEC4A;EDNRB;DAAM1;STK38L;SERPING1;GPC4;RIN1;SOX6;KPNA3;MYH10;MDM1
SOX9_25088423_ChIP-ChIP_EMBRYONIC_GONADS_Mouse	0.979302	NEBL;GFPT2;HSPB8;AK1;EPHX1;PCDH18;TIAM1;ABLIM1;PDLIM3;CDC42EP4;TSPAN6;SERPING1;GPC4;RIN1;NAT8L;SOX6;MTA3
GATA3_20176728_ChIP-ChIP_TSCs_Mouse	0.987173	TMEM123;AK1;SPARCL1;STK38L;CLU;FGF2;EHBP1
SOX2_18555785_ChIP-Seq_MESCs_Mouse	0.987453	CD109;STEAP2;JAM2;MDM1
PPARG_20176806_ChIP-Seq_THIOMACROPHAGE_Mouse	0.987453	CCDC80;DENND2A;ATP1A2;DIRC2;RABL5;CD44;TMEM231
FOXM1_23109430_ChIP-Seq_U2OS_Human	0.989482	BAALC;TXNIP
NOTCH1_17114293_ChIP-ChIP_T-ALL_Human	0.989482	CPE
FLI1_27457419_Chip-Seq_LIVER_Mouse	0.989482	UXS1;RAB23;SULF1
TRP63_18441228_ChIP-ChIP_KERATINOCYTES_Mouse	0.989482	HSPB8
RUNX_20019798_ChIP-Seq_JUKART_Human	0.989482	TIAM1;MSI2;ADD3;CD44;MDM1
IKZF1_21737484_ChIP-ChIP_HCT116_Human	0.989482	RAB23
PCGF2_27294783_Chip-Seq_ESCs_Mouse	0.989482	UXS1;RAB23;SULF1;PAM
POU5F1_18358816_ChIP-ChIP_MESCs_Mouse	0.989482	SOX2;PRPF38A;NFIA;ZMAT3;JAM2;DAK
SREBP1_19666523_ChIP-Seq_LIVER_Mouse	0.989482	NOTCH2;NTRK2;FMN2;SULF1;GNG12;EHBP1
NFE2L2_22581777_ChIP-Seq_LYMPHOBLASTOID_Human	0.989482	ABLIM1;NRG3;ITGB8;EHBP1
STAT1_20625510_ChIP-Seq_HELA_Human	0.989482	RSPH1;SDC4;TP53BP2;ITGB8;LIFR
MYC_20876797_ChIP-ChIP_MEDULLOBLASTOMA_Human	0.989482	NTRK2;SMAD1;RCN1;FZD3;NFIA;UXS1;CTNND2;BOC;KIT;GRAMD3;KPNA3;NR3C2
MYBL2_22936984_ChIP-ChIP_MESCs_Mouse	0.989482	RFTN2;NTRK2;GLIS3;MLC1;LIFR;AEBP1;MAT2B;PRDX6;ENAH;SOX2;ZMAT3;CDC42EP4;PCBP1;SPIN1;TXNIP;SERPING1;FBXO8;DIRC2;CRK;JAM2
RCOR1_19997604_ChIP-ChIP_NEURONS_Mouse	0.989482	YAP1;SMAD2;FZD3;PON2;CTNND2;PBXIP1;LIFR;ADD3;PCDH18;TIAM1;NFIB;PCBP1;TSPAN6;RABL3;STK38L;NBN;FBXO8;IL17D;FBXL4;JAM2;MFAP3L
SPI1_20176806_ChIP-Seq_THIOMACROPHAGE_Mouse	0.989482	RBM17;AHNAK;ADD3;GRAMD3;TMEM231;GLIS2;CCDC80;MDFIC;STOM;GPD1L;DIRC2;CRK;CD44;MDM1
KAP1_22055183_ChIP-Seq_ESCs_Mouse	0.989482	SLC22A4;AHNAK;GFPT2;EPHX1;PLOD2;PBXIP1;MAT2B;FMN2;ADD3;PRDX6;HERC5;DPYSL3;TMEM38B;FBXL4;MTA3;PAM;KCTD15
MAF_26560356_Chip-Seq_TH2_Human	0.989482	KLHDC2;NANOS1;NOTCH2;SMAD2;RBM17;AHNAK;PBXIP1;MSI2;ADD3;EHBP1;B3GALTL;MDFIC;ZNHIT6;CDC42EP4;EHBP1L1;TXNIP;CD44
TET1_21451524_ChIP-Seq_MESCs_Mouse	0.989482	SDC4;AHNAK;ANKRD35;GFPT2;ATP1A2;AEBP1;GRAMD3;SIRT1;GLIS2;TIAM1;TMEM123;MDFIC;EHBP1L1;TXNIP;NBN;RIN1
CEBPA_26348894_ChIP-Seq_LIVER_Mouse	0.989482	NANOS1;FZD3;AHNAK;ANKRD35;UXS1;PLOD2;PRKCA;GRAMD3;SIRT1;NR3C2;GLIS2;PYGO1;DPYSL3;SOX6;STEAP2;MYH10;KCTD15
PHF8_20622854_ChIP-Seq_HELA_Human	0.989482	RBM17;RALBP1;AHNAK;ANKRD35;HSPB8;AK1;EPHX1;MSI2;MLF1;CLEC4A;MRAS;NNT;RRAGD;TP53BP2;ZNF853;CRK;KCTD15
OCT4_19829295_ChIP-Seq_ESCs_Human	0.989482	NANOS1;RBM17;SCARA3;PRPF38A;AHNAK;ANKRD35;EYA2;EPHX1;AEBP1;FMN2;EHBP1L1;RRAGD;EZR;FBXL4;CRK;MEGF9;BMPR1A
BCOR_27268052_Chip-Seq_Bcells_Human	0.989482	RBM17;PRPF38A;SDC4;AHNAK;EYA2;HSPB8;GMPR;ATP1B2;AGPAT3;MLF1;MRAS;NFIB;RRAGD;TP53BP2;STOM;CD24;CRK
BCL6_25482012_ChIP-Seq_CML-JURL-MK1_Human	0.989482	RBM17;RALBP1;SYNPO2;DENND2A;AGPAT3;AQP1;DAK;B3GALTL;RSPH1;ALDH5A1;CDC42EP4;PCBP1;EHBP1L1;CD24;EZR;STEAP2;BMPR1A
CEBPB_22108803_ChIP-Seq_LS180_Human	0.989482	YAP1;RALBP1;SDC4;EYA2;SPNS3;AKR1C2;PRKCA;GNG12;ABLIM1;MRAS;MDFIC;NFIB;RNF19A;BOC;STK38L;CD44;MDM1
GATA6_21074721_ChIP-Seq_CACO-2_Mouse	0.989482	PRPF38A;AHCYL1;ANKRD35;NEBL;AKR1C2;PDE4DIP;ATP1A2;ADD3;GNG12;SIRT1;PRDX6;ENAH;NFIA;ZNHIT6;TP53BP2;TXNIP;AIDA
PU.1_20513432_ChIP-Seq_MACROPHAGES_Mouse	0.989482	KLHDC2;AHNAK;PON2;SPNS3;GLIS3;GRAMD3;EHBP1;AGPAT3;GLIS2;CCDC80;MDFIC;EHBP1L1;NBN;RIN1;PAM;CRK;KPNA3
P68_20966046_ChIP-Seq_HELA_Human	0.989482	NANOS1;RALBP1;AHNAK;PON2;HSPB8;EPHX1;GMPR;PBXIP1;MSI2;MLF1;MRAS;NFIB;NNT;ZNF853;CRK;RABL5;BMPR1A
P53_21459846_ChIP-Seq_SAOS-2_Human	0.989482	GPM6A;AHCYL1;PON2;AEBP1;FRY;ADD3;MLF1;NFIA;DPY19L3;FAM173B;MDFIC;NFIB;RAB23;RRAGD;TP53BP2;SPIN1;SOX9
MYB_26560356_Chip-Seq_TH2_Human	0.989482	SMAD2;RBM17;AHCYL1;AHNAK;UXS1;PDE4DIP;PBXIP1;AEBP1;TOB1;EHBP1;CCDC80;NNT;SPOCK2;PCBP1;GPD1L;EZR;CD44
CBX2_22325352_ChIP-Seq_293T-Rex_Human	0.989482	NOTCH2;PRPF38A;AHCYL1;ANKRD35;UXS1;PDE4DIP;SOX11;FMN2;GNG12;PRDX6;EHBP1;ENAH;CACNB4;NFIA;ZNHIT6;TP53BP2;AIDA
ESET_19884257_ChIP-Seq_ESCs_Mouse	0.989482	NOTCH2;RBM17;EYA2;FAM13A;GMPR;MLC1;MSI2;PLCXD3;ALDH5A1;DAAM1;DOK5;SPOCK2;ID4;TXNIP;TMEM38B;IL17D;PAM
ZFX_18555785_Chip-Seq_ESCs_Mouse	0.989482	RBM17;SDC4;EYA2;SYNPO2;UXS1;EPHX1;ATP1A2;FMN2;SULF1;PRDX6;RYR3;ENAH;RCN1;DOK5;RAB23;PAM;CD44
RUNX1_27457419_Chip-Seq_LIVER_Mouse	0.989482	RFTN2;RBM17;SDC4;NEBL;UXS1;EPHX1;ATP1A2;FMN2;SULF1;PRDX6;ENAH;CACNB4;DOK5;RAB23;STOM;SERPING1;PAM
FLI1_21867929_ChIP-Seq_CD8_Mouse	0.989482	RBM17;EYA2;PON2;HSPB8;DENND2A;AK1;ATP1B2;GRAMD3;CLU;AGPAT3;ARHGAP32;RNF19A;EHBP1L1;CPE;GPD1L;RIN1;MDM1
SMRT_22465074_ChIP-Seq_MACROPHAGES_Mouse	0.989482	SLC22A4;NOTCH2;SDC4;PON2;EPHX1;GLIS3;ADD3;NNT;CDC42EP4;RNF19A;EHBP1L1;STOM;TXNIP;DIRC2;CRK;KPNA3;CD44
CTCF_18555785_ChIP-Seq_MESCs_Mouse	0.991333	LGI1;NTRK2;FARP1;RBM17;AHCYL1;OCRL;CLU;B3GALTL;ALDH5A1;DPYSL3;CPE;NBN;RIN1
CTNNB1_24651522_ChIP-Seq_LGR5+_INTESTINAL_STEM_Human	0.997826	TMEM47
FOXP1_21924763_ChIP-Seq_HESCs_Human	0.997826	YAP1;NOTCH2;AHCYL1;ANKRD35;AHNAK;CAB39L;ATP1A2;MAT2B;CLU;AGPAT3;GLIS2;HERC5;TMEM47;CDH2;RNF19A;TP53BP2;NBN;KPNA3;KLHDC2;RBM17;SCARA3;PDE4DIP;SIRT1;DAK;B3GALTL;DAAM1;PSAT1;CDC42EP4;EHBP1L1;TXNIP;AIDA;RIN1;KCTD15
TP53_16413492_ChIP-PET_HCT116_Human	0.999992	MSI2;ARHGAP5;FGF2
CREB1_15753290_ChIP-ChIP_HEK293T_Human	0.999992	AHCYL1;CPE;FBXO8;MYH10;MLF1
TBP_23326641_ChIP-Seq_C3H10T1-2_Mouse	0.999992	PSAT1;RAB23;HSPB8;EHBP1L1;MAT2B;ADD3;AGPAT3;DAK
IRF8_21731497_ChIP-ChIP_J774_Mouse	0.999992	CAB39L;DENND2A
FOXP3_17237761_ChIP-ChIP_TREG_Mouse	0.999992	CD44
POU5F1_18555785_ChIP-Seq_MESCs_Mouse	0.999992	RBM17;CD109;FBXO8;MEGF9
GATA1_19941826_ChIP-Seq_K562_Human	0.999992	CDC42EP4;EHBP1L1;GOLIM4;GMPR;EFHC2;MYH10;AQP1
IRF8_22096565_ChIP-ChIP_GC-B_Mouse	0.999992	NAP1L3;MAT2B;FBXO8;GRAMD3;PRDX6
IRF8_22096565_ChIP-ChIP_GC-B_Human	0.999992	NBN
CIITA_25753668_ChIP-Seq_RAJI_Human	0.999992	CAB39L;PDE4DIP;CRK
PCGF2_27294783_Chip-Seq_NPCs_Mouse	0.999992	RFTN2;UXS1;PAM
ASXL1_24218140_ChIP-Seq_BMDM_Mouse	0.999992	NOTCH2;RCN1;UXS1;EHBP1L1;KPNA3;DAK
SRY_22984422_ChIP-ChIP_TESTIS_Rat	0.999992	RABL3
MYCN_19997598_ChIP-ChIP_NEUROBLASTOMA_Human	0.999992	ATP1A2
CEBPA_23403033_ChIP-Seq_LIVER_Mouse	0.999992	ACSS3;PSAT1;SYNPO2;GPD1L
STAT3_20064451_ChIP-Seq_CD4+T_Mouse	0.999992	NTRK2;RBM17;AHNAK;UXS1;PCBP1;TXNIP;SPARCL1;SERPING1;PRDX6;CD44;MDM1
VDR_24787735_ChIP-Seq_THP-1_Human	0.999992	TMEM123;NFIA;LMO3;TXNIP;PDE4DIP;ADCY8
CTNNB1_20615089_ChIP-ChIP_FETAL_BRAIN_Human	0.999992	ENAH;PDE4DIP
HCFC1_20581084_ChIP-Seq_MESCs_Mouse	0.999992	FBXO8
AR_21909140_ChIP-Seq_LNCAP_Human	0.999992	LIFR
MYC_22102868_ChIP-Seq_BL_Human	0.999992	SMAD2;TMEM123;GOLIM4;GLIS2
REST_18959480_ChIP-ChIP_MESCs_Mouse	0.999992	SMAD2;NTRK2;GPM6A;NEBL;EYA2;LMO3;UXS1;GFPT2;CTNND2;DENND2A;PDE4DIP;PRKCA;MAT2B;MRAS;NRG3;CDH2;DOK5;ID4;CPE;SLC16A9;BMPR1B;RABL5;JAM2
E2F4_17652178_ChIP-ChIP_JURKAT_Human	0.999992	SMAD1;NNT;ARHGAP5;FBXO8;TMEM38B
E2F1_21310950_ChIP-Seq_MCF-7_Human	0.999992	SLC22A4;IQCK;NFIA;DOK5;NFIB;KIT;MSI2;NBN
DCP1A_22483619_ChIP-Seq_HELA_Human	0.999992	NOTCH2;SLC22A4;PCBP1;CPE;FRY
PPARG_23326641_ChIP-Seq_C3H10T1-2_Mouse	0.999992	RBM17;PCBP1;TOB1;PAM
FOXM1_25889361_ChIP-Seq_OE33_AND_U2OS_Human	0.999992	YAP1;RCN1;NFIA;NNT;PCBP1;TXNIP;DAK
VDR_20736230_ChIP-Seq_LYMPHOBLASTOID_Human	0.999992	RBM17;MSI2
EST1_17652178_ChIP-ChIP_JURKAT_Human	0.999992	DAAM1;RABL3;FBXO8
CUX1_19635798_ChIP-ChIP_MULTIPLE_HUMAN_CANCER_TYPES_Human	0.999992	SLC22A4;SOX11;SULF1;CLU;ABLIM1;RCN1;ALDH5A1;EDNRB;CDH2;PSAT1;DOK5;NNT;ID4;GPC4;RIN1;PAM;MYH10;KCTD15
ELF1_20517297_ChIP-Seq_JURKAT_Human	0.999992	SDC4;AHNAK;RAB23;SPNS3;HSPB8;AK1;EPHX1
YY1_22570637_ChIP-Seq_MALME-3M_Human	0.999992	SDC4;EHBP1L1;AK1;ID4;GMPR;PBXIP1;MLF1
TBX5_21415370_ChIP-Seq_HL-1_Mouse	0.999992	YAP1;AHNAK;CAB39L;PON2;AK1;FRY;ADD3;GRAMD3;TOB1;NR3C2;HERC5;ENAH;ABLIM1;MRAS;RIN1;SOX6;GPR125;MEGF9;MDM1
GABP_17652178_ChIP-ChIP_JURKAT_Human	0.999992	PCBP1;FBXO8
THAP11_20581084_ChIP-Seq_MESCs_Mouse	0.999992	RABL3;PDE4DIP;GPD1L;KPNA3
EZH2_27294783_Chip-Seq_NPCs_Mouse	0.999992	ENAH;RFTN2;SPOCK2;UXS1;RAB23;SLC16A9;FMN2;SULF1;PRDX6;PAM;AGPAT3
CBP_20019798_ChIP-Seq_JUKART_Human	0.999992	NANOS1;DPY19L3;HSPB8;ITGB8;FBXL4;KCTD15
IRF4_20064451_ChIP-Seq_CD4+T_Mouse	0.999992	NANOS1;DPY19L3;HSPB8;ITGB8;FBXL4;KCTD15
MYC_19079543_ChIP-ChIP_MESCs_Mouse	0.999992	SOX2;RALBP1;MRAS;CACNB4;PSAT1;ZMAT3;PCBP1;TXNIP;LIFR;PRDX6
CHD1_19587682_ChIP-ChIP_MESCs_Mouse	0.999992	SOX2;TXNIP;KPNA3;DAK
VDR_21846776_ChIP-Seq_THP-1_Human	0.999992	LMO3;PDE4DIP;AGPAT3;GLIS2
STAT4_19710469_ChIP-ChIP_TH1__Mouse	0.999992	SDC4;NFIA;AHNAK;PON2;SERPING1;ADD3;SOX6;PRDX6;BMPR1A
EGR1_23403033_ChIP-Seq_LIVER_Mouse	0.999992	HSPB8;GOLIM4;SERPING1;KPNA3;CLU
TP53_22573176_ChIP-Seq_HFKS_Human	0.999992	HERC5;IL33;GPM6A;RCN1;NRG3;RNF19A;RRAGD;CPE;ADD3;MYH10
KDM5A_27292631_Chip-Seq_BREAST_Human	0.999992	RALBP1;DPY19L3;ZNHIT6;MAT2B;PRDX6;DAK
PAX6_23342162_ChIP-ChIP_BETA-FORBRAIN-LENS_Mouse	0.999992	RCN1;PON2;PCBP1;SPIN1;GFAP
FOXP3_21729870_ChIP-Seq_TREG_Human	0.999992	HERC5;TMEM123;ABLIM1;FAM173B;PCBP1;FAM13A;TXNIP;AIDA;FBXO8;MFAP3L;NR3C2
STAT5_23275557_ChIP-Seq_MAMMARY-EPITHELIUM_Mouse	0.999992	IL33;ARHGAP32;RALBP1;IQCK;FAM173B;MDFIC;NFIB;NNT
RUNX1_20887958_ChIP-Seq_HPC-7_Mouse	0.999992	EYA2;AK1;TXNIP;ADD3;EHBP1;AGPAT3;CAP2
CCND1_20090754_ChIP-ChIP_RETINA_Mouse	0.999992	RALBP1;CAB39L;UXS1;PDE4DIP;MAT2B;ADD3;TOB1;PCDH18;ENAH;NFIA;NNT;CDC42EP4;PCBP1;RABL3;FBXO8;MYH10
HOXB4_20404135_ChIP-ChIP_EML_Mouse	0.999992	RALBP1;CAB39L;PCBP1;MAT2B;FBXO8;TOB1;FBXL4;CRK;RABL5;MDM1
MYC_18555785_ChIP-Seq_MESCs_Mouse	0.999992	NANOS1;YAP1;ZMAT3;GFPT2;SIRT1
SPI1_22096565_ChIP-ChIP_GC-B_Mouse	0.999992	NFIA;PSAT1;CAB39L;PBXIP1;GRAMD3;PRDX6
LYL1_20887958_ChIP-Seq_HPC-7_Mouse	0.999992	TXNIP
EBNA2_21746931_ChIP-Seq_IB4-LCL_Human	0.999992	SLC22A4;RBM17;FARP1;PDLIM3;MRAS;ANKRD35;EHBP1L1;RRAGD;CD44;MLF1
BCL3_23251550_ChIP-Seq_MUSCLE_Mouse	0.999992	SDC4;TXNIP;KCTD15
RBPJ_21746931_ChIP-Seq_IB4-LCL_Human	0.999992	YAP1;FARP1;RBM17;ANKRD35;GMPR;PRDX6;MLF1;PDLIM3;EHBP1L1;RRAGD;TP53BP2;TXNIP;AIDA;RIN1;KPNA3;CD44
ZFP42_18358816_ChIP-ChIP_MESCs_Mouse	0.999992	ENAH;PCBP1;GLIS3;MLC1;GPD1L;JAM2
SMAD4_21741376_ChIP-Seq_ESCs_Human	0.999992	KLHDC2;RBM17;EYA2;DENND2A;ATP1B2;AGPAT3;DAK;ENAH;NFIB;DPYSL3;SIDT1;TP53BP2;GPC4;NBN;FBXL4;MEGF9
TTF2_22483619_ChIP-Seq_HELA_Human	0.999992	HERC5;SLC22A4;KLHDC2;PRPF38A;NFIA;TXNIP;EZR;GNG12;SIRT1;PAM
FLI1_20887958_ChIP-Seq_HPC-7_Mouse	0.999992	KLHDC2;EYA2;PON2;XIAP;OCRL;ADD3;TMEM123;RSPH1;NFIB;PSAT1;RAB23;ZNHIT6;TXNIP;NBN;FBXL4;MTA3
MAF_26560356_Chip-Seq_TH1_Human	0.999992	NANOS1;RBM17;AHNAK;PDE4DIP;PBXIP1;LYSMD4;ATP1B2;ADD3;TOB1;SIRT1;EHBP1;DPY19L3;PCBP1;EHBP1L1;TXNIP;BMPR1A
NELFA_20434984_ChIP-Seq_ESCs_Mouse	0.999992	PRPF38A;SDC4;GFPT2;ATP1B2;ADD3;TOB1;IQCK;CDC42EP4;KIT;TXNIP;MYH10;MEGF9;MDM1
BCL6_27268052_Chip-Seq_Bcells_Human	0.999992	FARP1;RBM17;PRPF38A;SDC4;GMPR;PBXIP1;AGPAT3;MLF1;ABLIM1;MRAS;NFIB;RNF19A;EHBP1L1;RRAGD;RABL5
E2A_27217539_Chip-Seq_RAMOS-Cell_line_Human	0.999992	NOTCH2;PDE4DIP;PBXIP1;AEBP1;EHBP1;RYR3;GLIS2;TMEM123;RSPH1;ALDH5A1;PCBP1;EHBP1L1;ID4;IL17D;MTA3
CTCF_21964334_ChIP-Seq_BJAB-B_Human	0.999992	SMAD2;RASL12;RBM17;AHCYL1;ANKRD35;PDE4DIP;LYSMD4;TOB1;RYR3;GLIS2;SOX2;ZMAT3;EHBP1L1;TXNIP;NBN;SOX6
VDR_24763502_ChIP-Seq_THP-1_Human	0.999992	PCBP1;LMO3;FRY;TOB1
KLF4_19829295_ChIP-Seq_ESCs_Human	0.999992	SLC22A4;SMAD2;NTRK2;PRPF38A;AHCYL1;SOX11;ATP1B2;ADD3;ADCY8;RCN1;NFIB;NNT;ZNF853;SOX6;FBXL4
ETS1_22383799_ChIP-Seq_G1ME_Mouse	0.999992	PRPF38A;UXS1;DENND2A;MSI2;ADD3;GRAMD3;TOB1;FGF2;SIRT1;PCDH18;EHBP1;MLF1;GLIS2;EDNRB;ZNHIT6;CAP2
SPI1_23127762_ChIP-Seq_K562_Human	0.999992	NOTCH2;SMAD2;FAM13A;PDE4DIP;EFHC2;SOX6
ETS1_20019798_ChIP-Seq_JURKAT_Human	0.999992	RALBP1;DAAM1;CAB39L;ZNHIT6;PCBP1;RABL3;PDE4DIP;ZNF45;CRK
CEBPA_20513432_ChIP-Seq_MACROPHAGES_Mouse	0.999992	AHNAK;PON2;UXS1;AK1;GLIS3;GRAMD3;GLIS2;TMEM123;CCDC80;CACNB4;PCBP1;SIDT1;PAM;KPNA3;MDM1
FOXH1_21741376_ChIP-Seq_ESCs_Human	0.999992	YAP1;NOTCH2;GPM6A;AHCYL1;OCRL;ADD3;PDLIM3;ALDH5A1;MRAS;SPOCK2;SLC16A9;BMPR1B;FBXL4;KPNA3;CD44
RAC3_21632823_ChIP-Seq_H3396_Human	0.999992	EYA2;FAM13A;GLIS3;AKR1C2;OCRL;MSI2;ATP1B2;AGPAT3;MLF1;RCN1;CDC42EP4;RNF19A;CD109;STOM
CEBPB_24764292_ChIP-Seq_MC3T3_Mouse	0.999992	RFTN2;XIAP;SOX11;TOB1;GLIS2;HERC5;SPOCK2;BOC;ID4;SPIN1;STK38L;GPC4;SOX9;RIN1;RABL5
CEBPB_20513432_ChIP-Seq_MACROPHAGES_Mouse	0.999992	PON2;UXS1;GLIS3;TOB1;GLIS2;PYGO1;ENAH;CACNB4;MDFIC;PCBP1;EHBP1L1;PAM;KPNA3;CD44;MDM1
HOXC9_25013753_ChIP-Seq_NEUROBLASTOMA_BE2-C_Human	0.999992	PRPF38A;CAB39L;FAM13A;MLF1;AQP1;SOX2;ABLIM1;PLCXD3;CCDC80;SPOCK2;ZNHIT6;NBN;KPNA3;MDM1
LMO2_20887958_ChIP-Seq_HPC-7_Mouse	0.999992	PON2;KIT;AK1;SPIN1;TXNIP;OCRL;MTA3;EHBP1;AGPAT3;CAP2;GFAP
RBPJ_21746931_ChIP-Seq_IB4_Human	0.999992	NOTCH2;PRPF38A;AHCYL1;PDE4DIP;SOX11;FMN2;GNG12;PRDX6;EHBP1;ENAH;NFIA;ZNHIT6;TP53BP2;MTA3
SPI1_26923725_Chip-Seq_MACROPHAGESS_Mouse	0.999992	DENND2A;GMPR;PRKCA;ATP1B2;ADD3;GNG12;DAK;ARHGAP32;TMEM123;RNF19A;STK38L;RIN1;DIRC2;MTA3;RABL5
MEIS1_20887958_ChIP-Seq_HPC-7_Mouse	0.999992	RSPH1;EYA2;TXNIP;EHBP1;CAP2
NCOR_22465074_ChIP-Seq_MACROPHAGES_Mouse	0.999992	SLC22A4;KLHDC2;AHNAK;PON2;GLIS3;MAT2B;ADD3;GNG12;TOB1;PRDX6;EHBP1;GFAP;ITGB8;TMEM38B;PAM;CRK
ERG_20887958_ChIP-Seq_HPC-7_Mouse	0.999992	NANOS1;CAB39L;GMPR;XIAP;FMN2;HERC5;B3GALTL;TMEM123;FAM173B;DAAM1;NBN;FBXO8;FBXL4;MTA3;MDM1
RXRA_24833708_ChIP-Seq_LIVER_Mouse	0.999992	YAP1;NOTCH2;LGI1;FARP1;RBM17;AK1;PBXIP1;LIFR;AEBP1;TOB1;TMEM123;SERPING1;NAT8L;CRK;KPNA3
CEBPB_26923725_Chip-Seq_MACROPHAGESS_Mouse	0.999992	RBM17;RALBP1;SPNS3;EPHX1;ATP1B2;ADD3;TMEM123;PDLIM3;FAM173B;TMEM38B;MTA3;STEAP2;MYH10;CD200
CEBPB_20176806_ChIP-Seq_THIOMACROPHAGE_Mouse	0.999992	PYGO1;RCN1;AHNAK;MDFIC;SOX6;TMEM231;MDM1
XRN2_22483619_ChIP-Seq_HELA_Human	0.999992	PRPF38A;CCDC80;PCBP1;ID4;EZR;GNG12;SIRT1
SA1_27219007_Chip-Seq_Bcells_Human	0.999992	AHCYL1;ANKRD35;SPNS3;EPHX1;ATP1A2;FMN2;GNG12;SIRT1;TMEM123;NFIA;EHBP1L1;SOX9;MDM1
GFI1B_20887958_ChIP-Seq_HPC-7_Mouse	0.999992	KLHDC2;NANOS1;NOTCH2;TMEM123;KIT;AK1;FMN2;NBN;NAT8L;ADD3;TOB1;GLIS2
GATA2_20887958_ChIP-Seq_HPC-7_Mouse	0.999992	RSPH1;RALBP1;FZD3;EYA2;HSPB8;TXNIP;SERPING1;ATP1A2;ADD3;EHBP1
JARID1B-DAIN_22020125_ChIP-Seq_ESCs_Mouse	0.999992	FAM13A;GMPR;ADD3;GRAMD3;FGF2;DAK;PYGO1;MRAS;NFIA;NFIB;GPD1L;MYH10;CAP2;MDM1
NCOR1_26117541_ChIP-Seq_K562_Human	0.999992	KLHDC2;RALBP1;DENND2A;PDE4DIP;ADD3;SIRT1;PRDX6;AGPAT3;RSPH1;DPY19L3;SPOCK2;RNF19A;BMPR1A
TRIM28_17542650_ChIP-ChIP_NTERA2_Human	0.999992	SMAD1;FZD3;NEBL;HSPB8;LMO3;LIFR;ZNF45;FMN2;FGF2;TIAM1;NFIA;ID4;SOX9;GPC4;FBXL4;CD44;CAP2
PU.1_20176806_ChIP-Seq_MACROPHAGES_Mouse	0.999992	KLHDC2;AHNAK;PON2;GLIS3;PBXIP1;ADD3;TOB1;GLIS2;CCDC80;MDFIC;KPNA3;CD44;MDM1
RARA_24833708_ChIP-Seq_LIVER_Mouse	0.999992	FARP1;GFPT2;AK1;GOLIM4;LIFR;AEBP1;ATP1B2;PYGO1;MDFIC;TXNIP;EFHC2;NAT8L;MYH10
CTCF_26484167_Chip-Seq_Bcells_Mouse	0.999992	RALBP1;ALDH5A1;ANKRD35;CDH10;CDC42EP4;AK1;PDE4DIP;RIN1;CLU;JAM2;KCTD15
GATA2_22383799_ChIP-Seq_G1ME_Mouse	0.999992	KLHDC2;NOTCH2;EYA2;GLIS2;TMEM123;RCN1;MRAS;DAAM1;NNT;CDH10;PCBP1;EHBP1L1;IL17D
PU.1_20513432_ChIP-Seq_Bcells_Mouse	0.999992	EYA2;PON2;SPNS3;EHBP1L1;TXNIP;SERPING1;NBN;PRDX6;AGPAT3;CD44;GLIS2
RARB_24833708_ChIP-Seq_LIVER_Mouse	0.999992	TMEM123;NFIB;PCBP1;AK1;TXNIP;PBXIP1;AEBP1;ATP1B2;RIN1;TOB1;CRK;GLIS2
CEBPB_20176806_ChIP-Seq_MACROPHAGES_Mouse	0.999992	RBM17;AHNAK;PON2;GLIS2;PYGO1;B3GALTL;ENAH;PCBP1;EHBP1L1;SIDT1;MTA3;KPNA3;CD44
ELK3_25401928_ChIP-Seq_HUVEC_Human	0.999992	RBM17;AHNAK;PDE4DIP;MAT2B;PRDX6;TMEM123;RCN1;ZNHIT6;CDC42EP4;EHBP1L1;TP53BP2;ITGB8;RIN1;CD44
CTCF_27219007_Chip-Seq_ERYTHROID_Human	0.999992	ENAH;NOTCH2;SMAD2;NFIA;ZNHIT6;EPHX1;AIDA;PRDX6;KCTD15;BMPR1A;MDM1
VDR_23849224_ChIP-Seq_CD4+_Human	0.999992	NOTCH2;RALBP1;AHCYL1;CAB39L;FAM13A;PBXIP1;SIRT1;NR3C2;HERC5;B3GALTL;ABLIM1;RABL3;GPD1L;FBXO8;KPNA3
LXR_22292898_ChIP-Seq_THP-1_Human	0.999992	NTRK2;SCARA3;AHCYL1;EHBP1L1;PDE4DIP;ZNF853;RIN1;NAT8L;CLU;AGPAT3;AQP1
CREB1_23762244_ChIP-Seq_HIPPOCAMPUS_Rat	0.999992	RALBP1;PRPF38A;AHCYL1;GOLIM4;PDE4DIP;MSI2;TOB1;TMEM231;PSAT1;ZMAT3;SPOCK2;PCBP1;RABL3;TXNIP;FBXO8;EZR;CRK;KPNA3;MYH10
FOXO3_22982991_ChIP-Seq_MACROPHAGES_Mouse	0.999992	KLHDC2;NOTCH2;SMAD2;IQCK;CAB39L;NNT;RRAGD;RABL3;STK38L;DIRC2;MTA3
JARID1A_20064375_ChIP-Seq_MESCs_Mouse	0.999992	RBM17;AHCYL1;PDE4DIP;NBN;MTA3;DAK
SPI1_22790984_ChIP-Seq_ERYTHROLEUKEMIA_Mouse	0.999992	SMAD2;TIAM1;TMEM123;DPY19L3;DAAM1;PSAT1;PCBP1;SPNS3;GOLIM4;STK38L;XIAP;IL17D
MYC_18358816_ChIP-ChIP_MESCs_Mouse	0.999992	YAP1;NTRK2;PRPF38A;UXS1;AK1;MLC1;LIFR;PBXIP1;MAT2B;PRDX6;DAK;ZMAT3;PSAT1;PCBP1;RAB23;KIT;RABL3;GPD1L;NBN;FBXO8;RIN1;MYH10
E2F4_21247883_ChIP-Seq_LYMPHOBLASTOID_Human	0.999992	YAP1;KLHDC2;NANOS1;RBM17;PRPF38A;AHCYL1;AHNAK;CAB39L;PDE4DIP;LYSMD4;ADD3;SIRT1;PRDX6;DAK;B3GALTL;ENAH;IQCK;TP53BP2;AIDA;CRK;KPNA3;MYH10;BMPR1A;MDM1
TAL1_20887958_ChIP-Seq_HPC-7_Mouse	0.999992	NOTCH2;TMEM123;FAM173B;PCBP1;KIT;RABL3;TOB1;MTA3;CRK;CAP2;MDM1
E2F1_18555785_ChIP-Seq_MESCs_Mouse	0.999992	YAP1;NOTCH2;AHCYL1;SDC4;AHNAK;GMPR;TOB1;CLU;SOX2;TMEM47;TMEM123;ZMAT3;PCBP1;RAB23;BOC;NBN;TMEM38B;NANOS1;SMAD1;GFPT2;EPHX1;ATP1B2;SIRT1;PRDX6;DAK;ENAH;B3GALTL;RCN1;ALDH5A1;DAAM1;MDFIC;PSAT1;KIT;TXNIP;CRK;STEAP2
GABP_19822575_ChIP-Seq_HepG2_Human	0.999992	KLHDC2;PDE4DIP;PBXIP1;ZNF45;MAT2B;DPY19L3;FAM173B;RAB23;CDC42EP4;PCBP1;RNF19A;CRK;MYH10
SFPI1_20887958_ChIP-Seq_HPC-7_Mouse	0.999992	KLHDC2;SMAD2;TMEM123;DAAM1;AHNAK;ZNHIT6;GMPR;STK38L;XIAP;NAT8L;FBXL4;CRK
CREB1_20920259_ChIP-Seq_GC1-SPG_Mouse	0.999992	KLHDC2;NANOS1;NOTCH2;PRPF38A;AHCYL1;AHNAK;CTNND2;GLIS3;PDE4DIP;ATP1B2;TOB1;MLF1;TIAM1;ABLIM1;SPOCK2;CDH10;CDC42EP4;RNF19A;EHBP1L1;STK38L;CRK;MYH10
MYC_19030024_ChIP-ChIP_MESCs_Mouse	0.999992	YAP1;AK1;MSI2;MAT2B;ADCY8;TOB1;PRDX6;DAK;ENAH;SOX2;IQCK;RSPH1;DPY19L3;ZMAT3;PCBP1;KIT;RABL3;NBN;FBXO8;DIRC2;KPNA3;KCTD15;MFAP3L
SPI1_23547873_ChIP-Seq_NB4_Human	0.999992	SMAD2;CERS6;AHCYL1;SDC2;SPNS3;PON2;GOLIM4;XIAP;ZNF45;AEBP1;EHBP1;TMEM123;ABLIM1;ZMAT3;RNF19A;RRAGD;EHBP1L1;STOM;TXNIP;STK38L;DIRC2;EZR
RUNX1_21571218_ChIP-Seq_MEGAKARYOCYTES_Human	0.999992	NOTCH2;SYNPO2;UXS1;CTNND2;GOLIM4;MLC1;GMPR;FRY;CLU;EHBP1;AGPAT3;RYR3;HERC5;PCBP1;RNF19A;SPIN1;STOM;STK38L;BAALC;FBXO8;DIRC2;KPNA3;MYH10;SMAD2;RBM17;NTRK2;RALBP1;DENND2A;PDE4DIP;PRKCA;LYSMD4;SIRT1;DAK;B3GALTL;RSPH1;DPY19L3;NFIB;CDC42EP4;EHBP1L1;RIN1;IL17D;CRK;RABL5;KCTD15;CD44
FLI1_21571218_ChIP-Seq_MEGAKARYOCYTES_Human	0.999992	UXS1;CTNND2;GOLIM4;ZNF45;FRY;RYR3;BOC;SPIN1;BAALC;SOX9;FBXO8;RBM17;DENND2A;PRKCA;SIRT1;TIAM1;RCN1;CACNB4;CD109;TXNIP;SPARCL1;EZR;CRK;NOTCH2;SDC4;AHNAK;AK1;EHBP1;AGPAT3;ZMAT3;PCBP1;STOM;STK38L;MTA3;KLHDC2;SMAD2;PRPF38A;NEBL;GFPT2;PDE4DIP;GNG12;PRDX6;DAK;TMEM231;RSPH1;DPY19L3;BMPR1B;IL17D;MDM1
CREM_20920259_ChIP-Seq_GC1-SPG_Mouse	0.999992	AHCYL1;UXS1;CTNND2;MSI2;FMN2;FRY;SOX2;CDH2;RNF19A;SPIN1;NBN;FBXO8;KPNA3;LIFR;SIRT1;MLF1;ENAH;IQCK;DOK5;CDC42EP4;KIT;EZR;CRK;STEAP2;PFN2;YAP1;NOTCH2;ADD3;TOB1;TMEM123;PDLIM3;PCBP1;RAB23;STOM;STK38L;MTA3;MYH10;KLHDC2;SMAD2;SMAD1;FZD3;PRPF38A;EYA2;GNG12;RSPH1;NFIA;DPY19L3;PSAT1;ID4;IL17D;MDM1;BMPR1A
