# Supplementary material for: A Unique TGFB1-Driven Genomic Program Links Astrocytosis, Low-Grade Inflammation and Partial Demyelination in Periplaques of Spinal Cords from Progressive Multiple Sclerosis Patients
Source: Preprints.org preprint supplement (doi:10.20944/preprints201708.0080.v1), 2017-08-23
Supplement: Supplementary file 2 [file Data supplement 1.xlsx]

## Sheet: List of candidate genes
Gene Symbol
ANGPT1
ANGPT2
ANGPT4
BDNF
BMP1
BMP10
BMP15
BMP2
BMP3
BMP4
BMP5
BMP6
BMP7
BMP8A
BMP8B
CCL1
CCL11
CCL13
CCL16
CCL17
CCL18
CCL19
CCL2
CCL20
CCL21
CCL22
CCL23
CCL24
CCL25
CCL26
CCL27
CCL28
CCL4
CCL5
CCL7
CCL8
CSF1
CSF2
CSF3
CX3CL1
CXCL1
CXCL10
CXCL11
CXCL12
CXCL13
CXCL14
CXCL16
CXCL17
CXCL2
CXCL3
CXCL5
CXCL6
CXCL9
EGF
EPO
FAP
FGA
FGB
FGF1
FGF10
FGF11
FGF12
FGF13
FGF14
FGF16
FGF17
FGF18
FGF19
FGF2
FGF20
FGF21
FGF22
FGF23
FGF3
FGF4
FGF5
FGF6
FGF7
FGF8
FGF9
GDNF
GZMA
GZMB
GZMH
GZMK
GZMM
HDGF
HGF
IFNA1
IFNA10
IFNA14
IFNA16
IFNA17
IFNA2
IFNA21
IFNA4
IFNA5
IFNA6
IFNA7
IFNA8
IFNB1
IFNE
IFNG
IFNK
IFNW1
IGF1
IL10
IL11
IL12A
IL12B
IL13
IL15
IL16
IL17A
IL17B
IL17C
IL17D
IL17F
IL18
IL19
IL1A
IL1B
IL1RN
IL2
IL20
IL21
IL22
IL23A
IL24
IL25
IL26
IL27
IL28A
IL29
IL3
IL32
IL33
IL34
IL4
IL5
IL6
IL7
IL8
IL9
INS
LEP
LIF
LTA
LTB
MIF
MMP1
MMP10
MMP11
MMP12
MMP13
MMP14
MMP15
MMP16
MMP17
MMP19
MMP2
MMP20
MMP21
MMP24
MMP25
MMP26
MMP27
MMP28
MMP3
MMP7
MMP8
MMP9
NGF
NTF3
NTF4
OSM
PDGFA
PDGFB
PDGFC
PDGFD
PF4
PF4V1
PPBP
PRF1
TGFA
TGFB1
TGFB2
TGFB3
TNF
VEGFA
VEGFB
VEGFC
XCL1
