# Supplementary material for: A Unique TGFB1-Driven Genomic Program Links Astrocytosis, Low-Grade Inflammation and Partial Demyelination in Periplaques of Spinal Cords from Progressive Multiple Sclerosis Patients
Source: Preprints.org preprint supplement (doi:10.20944/preprints201708.0080.v1), 2017-08-23
Supplement: Supplementary file 3 [file Data supplement 2.xlsx]

## Sheet: CX43 GJA1 Co-exp Network
Gene Symbol	Description
ABHD17C	abhydrolase domain containing 17C [Source:HGNC Symbol;Acc:26925]
ABLIM1	actin binding LIM protein 1 [Source:HGNC Symbol;Acc:78]
ACSS3	acyl-CoA synthetase short-chain family member 3 [Source:HGNC Symbol;Acc:24723]
ADCY8	adenylate cyclase 8 (brain) [Source:HGNC Symbol;Acc:239]
ADD3	adducin 3 (gamma) [Source:HGNC Symbol;Acc:245]
AEBP1	AE binding protein 1 [Source:HGNC Symbol;Acc:303]
AGPAT3	1-acylglycerol-3-phosphate O-acyltransferase 3 [Source:HGNC Symbol;Acc:326]
AHCYL1	adenosylhomocysteinase-like 1 [Source:HGNC Symbol;Acc:344]
AHNAK	AHNAK nucleoprotein [Source:HGNC Symbol;Acc:347]
AIDA	axin interactor, dorsalization associated [Source:HGNC Symbol;Acc:25761]
AK1	adenylate kinase 1 [Source:HGNC Symbol;Acc:361]
AK4	adenylate kinase 4 [Source:HGNC Symbol;Acc:363]
AKR1C2	aldo-keto reductase family 1, member C2 [Source:HGNC Symbol;Acc:385]
ALDH5A1	aldehyde dehydrogenase 5 family, member A1 [Source:HGNC Symbol;Acc:408]
ANKRD35	ankyrin repeat domain 35 [Source:HGNC Symbol;Acc:26323]
AQP1	aquaporin 1 [Source:HGNC Symbol;Acc:633]
AR	androgen receptor [Source:HGNC Symbol;Acc:644]
ARHGAP32	Rho GTPase activating protein 32 [Source:HGNC Symbol;Acc:17399]
ARHGAP5	Rho GTPase activating protein 5 [Source:HGNC Symbol;Acc:675]
ATP1A2	ATPase, Na+/K+ transporting, alpha 2 polypeptide [Source:HGNC Symbol;Acc:800]
ATP1B2	ATPase, Na+/K+ transporting, beta 2 polypeptide [Source:HGNC Symbol;Acc:805]
B3GALTL	beta 1,3-galactosyltransferase-like [Source:HGNC Symbol;Acc:20207]
BAALC	brain and acute leukemia, cytoplasmic [Source:HGNC Symbol;Acc:14333]
BMPR1A	bone morphogenetic protein receptor, type IA [Source:HGNC Symbol;Acc:1076]
BMPR1B	bone morphogenetic protein receptor, type IB [Source:HGNC Symbol;Acc:1077]
BOC	BOC cell adhesion associated, oncogene regulated [Source:HGNC Symbol;Acc:17173]
CAB39L	calcium binding protein 39-like [Source:HGNC Symbol;Acc:20290]
CACNB4	calcium channel, voltage-dependent, beta 4 subunit [Source:HGNC Symbol;Acc:1404]
CAP2	CAP, adenylate cyclase-associated protein, 2 (yeast) [Source:HGNC Symbol;Acc:20039]
CCDC80	coiled-coil domain containing 80 [Source:HGNC Symbol;Acc:30649]
CD109	CD109 molecule [Source:HGNC Symbol;Acc:21685]
CD200	CD200 molecule [Source:HGNC Symbol;Acc:7203]
CD24	CD24 molecule [Source:HGNC Symbol;Acc:1645]
CD44	CD44 molecule (Indian blood group) [Source:HGNC Symbol;Acc:1681]
CDC42EP4	CDC42 effector protein (Rho GTPase binding) 4 [Source:HGNC Symbol;Acc:17147]
CDH10	cadherin 10, type 2 (T2-cadherin) [Source:HGNC Symbol;Acc:1749]
CDH2	cadherin 2, type 1, N-cadherin (neuronal) [Source:HGNC Symbol;Acc:1759]
CDIP1	cell death-inducing p53 target 1 [Source:HGNC Symbol;Acc:13234]
CERS6	ceramide synthase 6 [Source:HGNC Symbol;Acc:23826]
CLEC4A	C-type lectin domain family 4, member A [Source:HGNC Symbol;Acc:13257]
CLU	clusterin [Source:HGNC Symbol;Acc:2095]
CNTN1	contactin 1 [Source:HGNC Symbol;Acc:2171]
COLCA2	colorectal cancer associated 2 [Source:HGNC Symbol;Acc:26978]
CPE	carboxypeptidase E [Source:HGNC Symbol;Acc:2303]
CRK	v-crk avian sarcoma virus CT10 oncogene homolog [Source:HGNC Symbol;Acc:2362]
CTNND2	catenin (cadherin-associated protein), delta 2 [Source:HGNC Symbol;Acc:2516]
DAAM1	dishevelled associated activator of morphogenesis 1 [Source:HGNC Symbol;Acc:18142]
DAK	dihydroxyacetone kinase 2 homolog (S. cerevisiae) [Source:HGNC Symbol;Acc:24552]
DENND2A	DENN/MADD domain containing 2A [Source:HGNC Symbol;Acc:22212]
DIRC2	disrupted in renal carcinoma 2 [Source:HGNC Symbol;Acc:16628]
DNAAF2	dynein, axonemal, assembly factor 2 [Source:HGNC Symbol;Acc:20188]
DOK5	docking protein 5 [Source:HGNC Symbol;Acc:16173]
DPY19L3	dpy-19-like 3 (C. elegans) [Source:HGNC Symbol;Acc:27120]
DPYSL3	dihydropyrimidinase-like 3 [Source:HGNC Symbol;Acc:3015]
EDNRB	endothelin receptor type B [Source:HGNC Symbol;Acc:3180]
EFHC2	EF-hand domain (C-terminal) containing 2 [Source:HGNC Symbol;Acc:26233]
EHBP1	EH domain binding protein 1 [Source:HGNC Symbol;Acc:29144]
EHBP1L1	EH domain binding protein 1-like 1 [Source:HGNC Symbol;Acc:30682]
EMC8	ER membrane protein complex subunit 8 [Source:HGNC Symbol;Acc:7864]
ENAH	enabled homolog (Drosophila) [Source:HGNC Symbol;Acc:18271]
EPHX1	epoxide hydrolase 1, microsomal (xenobiotic) [Source:HGNC Symbol;Acc:3401]
EYA2	eyes absent homolog 2 (Drosophila) [Source:HGNC Symbol;Acc:3520]
EZR	ezrin [Source:HGNC Symbol;Acc:12691]
FAM13A	family with sequence similarity 13, member A [Source:HGNC Symbol;Acc:19367]
FAM173B	family with sequence similarity 173, member B [Source:HGNC Symbol;Acc:27029]
FARP1	FERM, RhoGEF (ARHGEF) and pleckstrin domain protein 1 (chondrocyte-derived) [Source:HGNC Symbol;Acc:3591]
FBXL4	F-box and leucine-rich repeat protein 4 [Source:HGNC Symbol;Acc:13601]
FBXO8	F-box protein 8 [Source:HGNC Symbol;Acc:13587]
FGF2	fibroblast growth factor 2 (basic) [Source:HGNC Symbol;Acc:3676]
FHL1	four and a half LIM domains 1 [Source:HGNC Symbol;Acc:3702]
FMN2	formin 2 [Source:HGNC Symbol;Acc:14074]
FRY	furry homolog (Drosophila) [Source:HGNC Symbol;Acc:20367]
FZD3	frizzled family receptor 3 [Source:HGNC Symbol;Acc:4041]
GFAP	glial fibrillary acidic protein [Source:HGNC Symbol;Acc:4235]
GFPT2	glutamine-fructose-6-phosphate transaminase 2 [Source:HGNC Symbol;Acc:4242]
GLIS2	GLIS family zinc finger 2 [Source:HGNC Symbol;Acc:29450]
GLIS3	GLIS family zinc finger 3 [Source:HGNC Symbol;Acc:28510]
GMPR	guanosine monophosphate reductase [Source:HGNC Symbol;Acc:4376]
GNG12	guanine nucleotide binding protein (G protein), gamma 12 [Source:HGNC Symbol;Acc:19663]
GOLIM4	golgi integral membrane protein 4 [Source:HGNC Symbol;Acc:15448]
GPC4	glypican 4 [Source:HGNC Symbol;Acc:4452]
GPD1L	glycerol-3-phosphate dehydrogenase 1-like [Source:HGNC Symbol;Acc:28956]
GPM6A	glycoprotein M6A [Source:HGNC Symbol;Acc:4460]
GPR125	G protein-coupled receptor 125 [Source:HGNC Symbol;Acc:13839]
GRAMD3	GRAM domain containing 3 [Source:HGNC Symbol;Acc:24911]
HERC5	HECT and RLD domain containing E3 ubiquitin protein ligase 5 [Source:HGNC Symbol;Acc:24368]
HSPB8	heat shock 22kDa protein 8 [Source:HGNC Symbol;Acc:30171]
ID4	inhibitor of DNA binding 4, dominant negative helix-loop-helix protein [Source:HGNC Symbol;Acc:5363]
IL17D	interleukin 17D [Source:HGNC Symbol;Acc:5984]
IL33	interleukin 33 [Source:HGNC Symbol;Acc:16028]
IQCK	IQ motif containing K [Source:HGNC Symbol;Acc:28556]
ITGB8	integrin, beta 8 [Source:HGNC Symbol;Acc:6163]
JAM2	junctional adhesion molecule 2 [Source:HGNC Symbol;Acc:14686]
KCTD15	potassium channel tetramerization domain containing 15 [Source:HGNC Symbol;Acc:23297]
KIT	v-kit Hardy-Zuckerman 4 feline sarcoma viral oncogene homolog [Source:HGNC Symbol;Acc:6342]
KLHDC2	kelch domain containing 2 [Source:HGNC Symbol;Acc:20231]
KLHL13	kelch-like family member 13 [Source:HGNC Symbol;Acc:22931]
KLHL40	kelch-like family member 40 [Source:HGNC Symbol;Acc:30372]
KPNA3	karyopherin alpha 3 (importin alpha 4) [Source:HGNC Symbol;Acc:6396]
LGI1	leucine-rich, glioma inactivated 1 [Source:HGNC Symbol;Acc:6572]
LIFR	leukemia inhibitory factor receptor alpha [Source:HGNC Symbol;Acc:6597]
LMO3	LIM domain only 3 (rhombotin-like 2) [Source:HGNC Symbol;Acc:6643]
LYSMD4	LysM, putative peptidoglycan-binding, domain containing 4 [Source:HGNC Symbol;Acc:26571]
MAT2B	methionine adenosyltransferase II, beta [Source:HGNC Symbol;Acc:6905]
MDFIC	MyoD family inhibitor domain containing [Source:HGNC Symbol;Acc:28870]
MDM1	Mdm1 nuclear protein homolog (mouse) [Source:HGNC Symbol;Acc:29917]
MEGF9	multiple EGF-like-domains 9 [Source:HGNC Symbol;Acc:3234]
MFAP3L	microfibrillar-associated protein 3-like [Source:HGNC Symbol;Acc:29083]
MLC1	megalencephalic leukoencephalopathy with subcortical cysts 1 [Source:HGNC Symbol;Acc:17082]
MLF1	myeloid leukemia factor 1 [Source:HGNC Symbol;Acc:7125]
MRAS	muscle RAS oncogene homolog [Source:HGNC Symbol;Acc:7227]
MSI2	musashi RNA-binding protein 2 [Source:HGNC Symbol;Acc:18585]
MTA3	metastasis associated 1 family, member 3 [Source:HGNC Symbol;Acc:23784]
MYH10	myosin, heavy chain 10, non-muscle [Source:HGNC Symbol;Acc:7568]
NADK2	NAD kinase 2, mitochondrial [Source:HGNC Symbol;Acc:26404]
NANOS1	nanos homolog 1 (Drosophila) [Source:HGNC Symbol;Acc:23044]
NAP1L3	nucleosome assembly protein 1-like 3 [Source:HGNC Symbol;Acc:7639]
NAT8L	N-acetyltransferase 8-like (GCN5-related, putative) [Source:HGNC Symbol;Acc:26742]
NBN	nibrin [Source:HGNC Symbol;Acc:7652]
NDNF	neuron-derived neurotrophic factor [Source:HGNC Symbol;Acc:26256]
NEBL	nebulette [Source:HGNC Symbol;Acc:16932]
NFIA	nuclear factor I/A [Source:HGNC Symbol;Acc:7784]
NFIB	nuclear factor I/B [Source:HGNC Symbol;Acc:7785]
NNT	nicotinamide nucleotide transhydrogenase [Source:HGNC Symbol;Acc:7863]
NOTCH2	notch 2 [Source:HGNC Symbol;Acc:7882]
NR3C2	nuclear receptor subfamily 3, group C, member 2 [Source:HGNC Symbol;Acc:7979]
NRG3	neuregulin 3 [Source:HGNC Symbol;Acc:7999]
NTRK2	neurotrophic tyrosine kinase, receptor, type 2 [Source:HGNC Symbol;Acc:8032]
OCRL	oculocerebrorenal syndrome of Lowe [Source:HGNC Symbol;Acc:8108]
PAM	peptidylglycine alpha-amidating monooxygenase [Source:HGNC Symbol;Acc:8596]
PBXIP1	pre-B-cell leukemia homeobox interacting protein 1 [Source:HGNC Symbol;Acc:21199]
PCBP1	poly(rC) binding protein 1 [Source:HGNC Symbol;Acc:8647]
PCDH18	protocadherin 18 [Source:HGNC Symbol;Acc:14268]
PDE4DIP	phosphodiesterase 4D interacting protein [Source:HGNC Symbol;Acc:15580]
PDLIM3	PDZ and LIM domain 3 [Source:HGNC Symbol;Acc:20767]
PFN2	profilin 2 [Source:HGNC Symbol;Acc:8882]
PLCXD3	phosphatidylinositol-specific phospholipase C, X domain containing 3 [Source:HGNC Symbol;Acc:31822]
PLOD2	procollagen-lysine, 2-oxoglutarate 5-dioxygenase 2 [Source:HGNC Symbol;Acc:9082]
PON2	paraoxonase 2 [Source:HGNC Symbol;Acc:9205]
PRDX6	peroxiredoxin 6 [Source:HGNC Symbol;Acc:16753]
PRKCA	protein kinase C, alpha [Source:HGNC Symbol;Acc:9393]
PRPF38A	pre-mRNA processing factor 38A [Source:HGNC Symbol;Acc:25930]
PSAT1	phosphoserine aminotransferase 1 [Source:HGNC Symbol;Acc:19129]
PYGO1	pygopus homolog 1 (Drosophila) [Source:HGNC Symbol;Acc:30256]
RAB23	RAB23, member RAS oncogene family [Source:HGNC Symbol;Acc:14263]
RABL3	RAB, member of RAS oncogene family-like 3 [Source:HGNC Symbol;Acc:18072]
RABL5	RAB, member RAS oncogene family-like 5 [Source:HGNC Symbol;Acc:21895]
RALBP1	ralA binding protein 1 [Source:HGNC Symbol;Acc:9841]
RASL12	RAS-like, family 12 [Source:HGNC Symbol;Acc:30289]
RBM17	RNA binding motif protein 17 [Source:HGNC Symbol;Acc:16944]
RCN1	reticulocalbin 1, EF-hand calcium binding domain [Source:HGNC Symbol;Acc:9934]
RFTN2	raftlin family member 2 [Source:HGNC Symbol;Acc:26402]
RIN1	Ras and Rab interactor 1 [Source:HGNC Symbol;Acc:18749]
RNF19A	ring finger protein 19A, RBR E3 ubiquitin protein ligase [Source:HGNC Symbol;Acc:13432]
RRAGD	Ras-related GTP binding D [Source:HGNC Symbol;Acc:19903]
RSPH1	radial spoke head 1 homolog (Chlamydomonas) [Source:HGNC Symbol;Acc:12371]
RYR3	ryanodine receptor 3 [Source:HGNC Symbol;Acc:10485]
SCARA3	scavenger receptor class A, member 3 [Source:HGNC Symbol;Acc:19000]
SDC2	syndecan 2 [Source:HGNC Symbol;Acc:10659]
SDC4	syndecan 4 [Source:HGNC Symbol;Acc:10661]
SEPT9	septin 9 [Source:HGNC Symbol;Acc:7323]
SERPING1	serpin peptidase inhibitor, clade G (C1 inhibitor), member 1 [Source:HGNC Symbol;Acc:1228]
SIDT1	SID1 transmembrane family, member 1 [Source:HGNC Symbol;Acc:25967]
SIRT1	sirtuin 1 [Source:HGNC Symbol;Acc:14929]
SLC16A9	solute carrier family 16, member 9 [Source:HGNC Symbol;Acc:23520]
SLC22A4	solute carrier family 22 (organic cation/zwitterion transporter), member 4 [Source:HGNC Symbol;Acc:10968]
SMAD1	SMAD family member 1 [Source:HGNC Symbol;Acc:6767]
SMAD2	SMAD family member 2 [Source:HGNC Symbol;Acc:6768]
SOX11	SRY (sex determining region Y)-box 11 [Source:HGNC Symbol;Acc:11191]
SOX2	SRY (sex determining region Y)-box 2 [Source:HGNC Symbol;Acc:11195]
SOX6	SRY (sex determining region Y)-box 6 [Source:HGNC Symbol;Acc:16421]
SOX9	SRY (sex determining region Y)-box 9 [Source:HGNC Symbol;Acc:11204]
SPARCL1	SPARC-like 1 (hevin) [Source:HGNC Symbol;Acc:11220]
SPIN1	spindlin 1 [Source:HGNC Symbol;Acc:11243]
SPNS3	spinster homolog 3 (Drosophila) [Source:HGNC Symbol;Acc:28433]
SPOCK2	sparc/osteonectin, cwcv and kazal-like domains proteoglycan (testican) 2 [Source:HGNC Symbol;Acc:13564]
STEAP2	STEAP family member 2, metalloreductase [Source:HGNC Symbol;Acc:17885]
STK38L	serine/threonine kinase 38 like [Source:HGNC Symbol;Acc:17848]
STOM	stomatin [Source:HGNC Symbol;Acc:3383]
SULF1	sulfatase 1 [Source:HGNC Symbol;Acc:20391]
SYBU	syntabulin (syntaxin-interacting) [Source:HGNC Symbol;Acc:26011]
SYNPO2	synaptopodin 2 [Source:HGNC Symbol;Acc:17732]
TCEAL2	transcription elongation factor A (SII)-like 2 [Source:HGNC Symbol;Acc:29818]
TIAM1	T-cell lymphoma invasion and metastasis 1 [Source:HGNC Symbol;Acc:11805]
TMEM123	transmembrane protein 123 [Source:HGNC Symbol;Acc:30138]
TMEM231	transmembrane protein 231 [Source:HGNC Symbol;Acc:37234]
TMEM38B	transmembrane protein 38B [Source:HGNC Symbol;Acc:25535]
TMEM47	transmembrane protein 47 [Source:HGNC Symbol;Acc:18515]
TOB1	transducer of ERBB2, 1 [Source:HGNC Symbol;Acc:11979]
TP53BP2	tumor protein p53 binding protein, 2 [Source:HGNC Symbol;Acc:12000]
TSPAN6	tetraspanin 6 [Source:HGNC Symbol;Acc:11858]
TXNIP	thioredoxin interacting protein [Source:HGNC Symbol;Acc:16952]
UXS1	UDP-glucuronate decarboxylase 1 [Source:HGNC Symbol;Acc:17729]
XIAP	X-linked inhibitor of apoptosis [Source:HGNC Symbol;Acc:592]
YAP1	Yes-associated protein 1 [Source:HGNC Symbol;Acc:16262]
ZMAT3	zinc finger, matrin-type 3 [Source:HGNC Symbol;Acc:29983]
ZNF106	zinc finger protein 106 [Source:HGNC Symbol;Acc:12886]
ZNF45	zinc finger protein 45 [Source:HGNC Symbol;Acc:13111]
ZNF853	zinc finger protein 853 [Source:HGNC Symbol;Acc:21767]
ZNHIT6	zinc finger, HIT-type containing 6 [Source:HGNC Symbol;Acc:26089]
