# Supplementary material for: A Unique TGFB1-Driven Genomic Program Links Astrocytosis, Low-Grade Inflammation and Partial Demyelination in Periplaques of Spinal Cords from Progressive Multiple Sclerosis Patients
Source: Preprints.org preprint supplement (doi:10.20944/preprints201708.0080.v1), 2017-08-23
Supplement: Supplementary file 4 [file Data supplement 3.xlsx]

## Sheet: Cx43 network females only
Gene Symbol	Description
ABHD17C	abhydrolase domain containing 17C [Source:HGNC Symbol;Acc:26925]
ABLIM1	actin binding LIM protein 1 [Source:HGNC Symbol;Acc:78]
ACVR1	activin A receptor, type I [Source:HGNC Symbol;Acc:171]
ADCY8	adenylate cyclase 8 (brain) [Source:HGNC Symbol;Acc:239]
ADD3	adducin 3 (gamma) [Source:HGNC Symbol;Acc:245]
AEBP1	AE binding protein 1 [Source:HGNC Symbol;Acc:303]
AEBP2	AE binding protein 2 [Source:HGNC Symbol;Acc:24051]
AGT	angiotensinogen (serpin peptidase inhibitor, clade A, member 8) [Source:HGNC Symbol;Acc:333]
AHCYL1	adenosylhomocysteinase-like 1 [Source:HGNC Symbol;Acc:344]
AHNAK	AHNAK nucleoprotein [Source:HGNC Symbol;Acc:347]
AIDA	axin interactor, dorsalization associated [Source:HGNC Symbol;Acc:25761]
AK1	adenylate kinase 1 [Source:HGNC Symbol;Acc:361]
AK4	adenylate kinase 4 [Source:HGNC Symbol;Acc:363]
AKR1C2	aldo-keto reductase family 1, member C2 [Source:HGNC Symbol;Acc:385]
AKR1C3	aldo-keto reductase family 1, member C3 [Source:HGNC Symbol;Acc:386]
ALDH5A1	aldehyde dehydrogenase 5 family, member A1 [Source:HGNC Symbol;Acc:408]
ANKRD30A	ankyrin repeat domain 30A [Source:HGNC Symbol;Acc:17234]
ANKRD35	ankyrin repeat domain 35 [Source:HGNC Symbol;Acc:26323]
AQP1	aquaporin 1 [Source:HGNC Symbol;Acc:633]
AR	androgen receptor [Source:HGNC Symbol;Acc:644]
ARHGAP32	Rho GTPase activating protein 32 [Source:HGNC Symbol;Acc:17399]
ARHGAP5	Rho GTPase activating protein 5 [Source:HGNC Symbol;Acc:675]
ARL5A	ADP-ribosylation factor-like 5A [Source:HGNC Symbol;Acc:696]
ATP1A2	ATPase, Na+/K+ transporting, alpha 2 polypeptide [Source:HGNC Symbol;Acc:800]
BAALC	brain and acute leukemia, cytoplasmic [Source:HGNC Symbol;Acc:14333]
BMPR1B	bone morphogenetic protein receptor, type IB [Source:HGNC Symbol;Acc:1077]
BOC	BOC cell adhesion associated, oncogene regulated [Source:HGNC Symbol;Acc:17173]
BRAP	BRCA1 associated protein [Source:HGNC Symbol;Acc:1099]
C2orf88	chromosome 2 open reading frame 88 [Source:HGNC Symbol;Acc:28191]
CA3	carbonic anhydrase III, muscle specific [Source:HGNC Symbol;Acc:1374]
CAB39L	calcium binding protein 39-like [Source:HGNC Symbol;Acc:20290]
CCDC113	coiled-coil domain containing 113 [Source:HGNC Symbol;Acc:25002]
CCDC80	coiled-coil domain containing 80 [Source:HGNC Symbol;Acc:30649]
CD24	CD24 molecule [Source:HGNC Symbol;Acc:1645]
CD8A	CD8a molecule [Source:HGNC Symbol;Acc:1706]
CDH10	cadherin 10, type 2 (T2-cadherin) [Source:HGNC Symbol;Acc:1749]
CDIP1	cell death-inducing p53 target 1 [Source:HGNC Symbol;Acc:13234]
CERS6	ceramide synthase 6 [Source:HGNC Symbol;Acc:23826]
CLEC4A	C-type lectin domain family 4, member A [Source:HGNC Symbol;Acc:13257]
CLU	clusterin [Source:HGNC Symbol;Acc:2095]
CNTN1	contactin 1 [Source:HGNC Symbol;Acc:2171]
CPE	carboxypeptidase E [Source:HGNC Symbol;Acc:2303]
CTCF	CCCTC-binding factor (zinc finger protein) [Source:HGNC Symbol;Acc:13723]
CTNND2	catenin (cadherin-associated protein), delta 2 [Source:HGNC Symbol;Acc:2516]
DAK	dihydroxyacetone kinase 2 homolog (S. cerevisiae) [Source:HGNC Symbol;Acc:24552]
DIRC2	disrupted in renal carcinoma 2 [Source:HGNC Symbol;Acc:16628]
DNAAF2	dynein, axonemal, assembly factor 2 [Source:HGNC Symbol;Acc:20188]
DNAJC7	DnaJ (Hsp40) homolog, subfamily C, member 7 [Source:HGNC Symbol;Acc:12392]
DNTTIP1	deoxynucleotidyltransferase, terminal, interacting protein 1 [Source:HGNC Symbol;Acc:16160]
DOK5	docking protein 5 [Source:HGNC Symbol;Acc:16173]
DPY19L3	dpy-19-like 3 (C. elegans) [Source:HGNC Symbol;Acc:27120]
DPYSL3	dihydropyrimidinase-like 3 [Source:HGNC Symbol;Acc:3015]
EHBP1L1	EH domain binding protein 1-like 1 [Source:HGNC Symbol;Acc:30682]
EIF4EBP2	eukaryotic translation initiation factor 4E binding protein 2 [Source:HGNC Symbol;Acc:3289]
EMC8	ER membrane protein complex subunit 8 [Source:HGNC Symbol;Acc:7864]
ENHO	energy homeostasis associated [Source:HGNC Symbol;Acc:24838]
EPC2	enhancer of polycomb homolog 2 (Drosophila) [Source:HGNC Symbol;Acc:24543]
ETNPPL	ethanolamine-phosphate phospho-lyase [Source:HGNC Symbol;Acc:14404]
EYA2	eyes absent homolog 2 (Drosophila) [Source:HGNC Symbol;Acc:3520]
EZR	ezrin [Source:HGNC Symbol;Acc:12691]
FAM173B	family with sequence similarity 173, member B [Source:HGNC Symbol;Acc:27029]
FAM81B	family with sequence similarity 81, member B [Source:HGNC Symbol;Acc:26335]
FANCF	Fanconi anemia, complementation group F [Source:HGNC Symbol;Acc:3587]
FBXL4	F-box and leucine-rich repeat protein 4 [Source:HGNC Symbol;Acc:13601]
FBXO8	F-box protein 8 [Source:HGNC Symbol;Acc:13587]
FRMD3	FERM domain containing 3 [Source:HGNC Symbol;Acc:24125]
FRY	furry homolog (Drosophila) [Source:HGNC Symbol;Acc:20367]
GBAS	glioblastoma amplified sequence [Source:HGNC Symbol;Acc:4179]
GFAP	glial fibrillary acidic protein [Source:HGNC Symbol;Acc:4235]
GLIS2	GLIS family zinc finger 2 [Source:HGNC Symbol;Acc:29450]
GLIS3	GLIS family zinc finger 3 [Source:HGNC Symbol;Acc:28510]
GMPR	guanosine monophosphate reductase [Source:HGNC Symbol;Acc:4376]
GOLIM4	golgi integral membrane protein 4 [Source:HGNC Symbol;Acc:15448]
GPC4	glypican 4 [Source:HGNC Symbol;Acc:4452]
GPM6A	glycoprotein M6A [Source:HGNC Symbol;Acc:4460]
GPR125	G protein-coupled receptor 125 [Source:HGNC Symbol;Acc:13839]
HCN3	hyperpolarization activated cyclic nucleotide-gated potassium channel 3 [Source:HGNC Symbol;Acc:19183]
HDLBP	high density lipoprotein binding protein [Source:HGNC Symbol;Acc:4857]
HERC5	HECT and RLD domain containing E3 ubiquitin protein ligase 5 [Source:HGNC Symbol;Acc:24368]
HSPB8	heat shock 22kDa protein 8 [Source:HGNC Symbol;Acc:30171]
ID4	inhibitor of DNA binding 4, dominant negative helix-loop-helix protein [Source:HGNC Symbol;Acc:5363]
IFFO2	intermediate filament family orphan 2 [Source:HGNC Symbol;Acc:27006]
IL17D	interleukin 17D [Source:HGNC Symbol;Acc:5984]
IL33	interleukin 33 [Source:HGNC Symbol;Acc:16028]
INHBB	inhibin, beta B [Source:HGNC Symbol;Acc:6067]
IRX3	iroquois homeobox 3 [Source:HGNC Symbol;Acc:14360]
JAM2	junctional adhesion molecule 2 [Source:HGNC Symbol;Acc:14686]
KDELC2	KDEL (Lys-Asp-Glu-Leu) containing 2 [Source:HGNC Symbol;Acc:28496]
KIAA0947	KIAA0947 [Source:HGNC Symbol;Acc:29154]
KIAA1191	KIAA1191 [Source:HGNC Symbol;Acc:29209]
KIT	v-kit Hardy-Zuckerman 4 feline sarcoma viral oncogene homolog [Source:HGNC Symbol;Acc:6342]
KLHDC2	kelch domain containing 2 [Source:HGNC Symbol;Acc:20231]
KLHL13	kelch-like family member 13 [Source:HGNC Symbol;Acc:22931]
KPNA3	karyopherin alpha 3 (importin alpha 4) [Source:HGNC Symbol;Acc:6396]
LGI1	leucine-rich, glioma inactivated 1 [Source:HGNC Symbol;Acc:6572]
LMO3	LIM domain only 3 (rhombotin-like 2) [Source:HGNC Symbol;Acc:6643]
LRAT	lecithin retinol acyltransferase (phosphatidylcholine--retinol O-acyltransferase) [Source:HGNC Symbol;Acc:6685]
LRP4	low density lipoprotein receptor-related protein 4 [Source:HGNC Symbol;Acc:6696]
LSM5	LSM5 homolog, U6 small nuclear RNA associated (S. cerevisiae) [Source:HGNC Symbol;Acc:17162]
LYSMD4	LysM, putative peptidoglycan-binding, domain containing 4 [Source:HGNC Symbol;Acc:26571]
MDM1	Mdm1 nuclear protein homolog (mouse) [Source:HGNC Symbol;Acc:29917]
MEGF9	multiple EGF-like-domains 9 [Source:HGNC Symbol;Acc:3234]
MLC1	megalencephalic leukoencephalopathy with subcortical cysts 1 [Source:HGNC Symbol;Acc:17082]
MLF1	myeloid leukemia factor 1 [Source:HGNC Symbol;Acc:7125]
MMACHC	methylmalonic aciduria (cobalamin deficiency) cblC type, with homocystinuria [Source:HGNC Symbol;Acc:24525]
MRGPRF	MAS-related GPR, member F [Source:HGNC Symbol;Acc:24828]
NADK2	NAD kinase 2, mitochondrial [Source:HGNC Symbol;Acc:26404]
NAP1L3	nucleosome assembly protein 1-like 3 [Source:HGNC Symbol;Acc:7639]
NAT8L	N-acetyltransferase 8-like (GCN5-related, putative) [Source:HGNC Symbol;Acc:26742]
NBN	nibrin [Source:HGNC Symbol;Acc:7652]
NDNF	neuron-derived neurotrophic factor [Source:HGNC Symbol;Acc:26256]
NDRG4	NDRG family member 4 [Source:HGNC Symbol;Acc:14466]
NEBL	nebulette [Source:HGNC Symbol;Acc:16932]
NFIA	nuclear factor I/A [Source:HGNC Symbol;Acc:7784]
NFIB	nuclear factor I/B [Source:HGNC Symbol;Acc:7785]
NNT	nicotinamide nucleotide transhydrogenase [Source:HGNC Symbol;Acc:7863]
NR3C2	nuclear receptor subfamily 3, group C, member 2 [Source:HGNC Symbol;Acc:7979]
NRG3	neuregulin 3 [Source:HGNC Symbol;Acc:7999]
NTRK2	neurotrophic tyrosine kinase, receptor, type 2 [Source:HGNC Symbol;Acc:8032]
OCRL	oculocerebrorenal syndrome of Lowe [Source:HGNC Symbol;Acc:8108]
OSBPL8	oxysterol binding protein-like 8 [Source:HGNC Symbol;Acc:16396]
PAM	peptidylglycine alpha-amidating monooxygenase [Source:HGNC Symbol;Acc:8596]
PBXIP1	pre-B-cell leukemia homeobox interacting protein 1 [Source:HGNC Symbol;Acc:21199]
PCBP1	poly(rC) binding protein 1 [Source:HGNC Symbol;Acc:8647]
PCDH17	protocadherin 17 [Source:HGNC Symbol;Acc:14267]
PCYOX1	prenylcysteine oxidase 1 [Source:HGNC Symbol;Acc:20588]
PDE4DIP	phosphodiesterase 4D interacting protein [Source:HGNC Symbol;Acc:15580]
PDLIM3	PDZ and LIM domain 3 [Source:HGNC Symbol;Acc:20767]
PFN2	profilin 2 [Source:HGNC Symbol;Acc:8882]
PGM1	phosphoglucomutase 1 [Source:HGNC Symbol;Acc:8905]
PHF13	PHD finger protein 13 [Source:HGNC Symbol;Acc:22983]
PHF16	PHD finger protein 16 [Source:HGNC Symbol;Acc:22982]
PIGC	phosphatidylinositol glycan anchor biosynthesis, class C [Source:HGNC Symbol;Acc:8960]
PIRT	phosphoinositide-interacting regulator of transient receptor potential channels [Source:HGNC Symbol;Acc:37239]
PLCXD3	phosphatidylinositol-specific phospholipase C, X domain containing 3 [Source:HGNC Symbol;Acc:31822]
PLOD2	procollagen-lysine, 2-oxoglutarate 5-dioxygenase 2 [Source:HGNC Symbol;Acc:9082]
PPAPDC1A	phosphatidic acid phosphatase type 2 domain containing 1A [Source:HGNC Symbol;Acc:23531]
PPIL4	peptidylprolyl isomerase (cyclophilin)-like 4 [Source:HGNC Symbol;Acc:15702]
PRDX6	peroxiredoxin 6 [Source:HGNC Symbol;Acc:16753]
PRKCA	protein kinase C, alpha [Source:HGNC Symbol;Acc:9393]
PRPF19	pre-mRNA processing factor 19 [Source:HGNC Symbol;Acc:17896]
PSAT1	phosphoserine aminotransferase 1 [Source:HGNC Symbol;Acc:19129]
PSMD12	proteasome (prosome, macropain) 26S subunit, non-ATPase, 12 [Source:HGNC Symbol;Acc:9557]
PSMG2	proteasome (prosome, macropain) assembly chaperone 2 [Source:HGNC Symbol;Acc:24929]
PTPRZ1	protein tyrosine phosphatase, receptor-type, Z polypeptide 1 [Source:HGNC Symbol;Acc:9685]
PYGO1	pygopus homolog 1 (Drosophila) [Source:HGNC Symbol;Acc:30256]
RAB14	RAB14, member RAS oncogene family [Source:HGNC Symbol;Acc:16524]
RABL3	RAB, member of RAS oncogene family-like 3 [Source:HGNC Symbol;Acc:18072]
RASL12	RAS-like, family 12 [Source:HGNC Symbol;Acc:30289]
RBM17	RNA binding motif protein 17 [Source:HGNC Symbol;Acc:16944]
RCHY1	ring finger and CHY zinc finger domain containing 1, E3 ubiquitin protein ligase [Source:HGNC Symbol;Acc:17479]
RCN1	reticulocalbin 1, EF-hand calcium binding domain [Source:HGNC Symbol;Acc:9934]
RGS22	regulator of G-protein signaling 22 [Source:HGNC Symbol;Acc:24499]
RRAGD	Ras-related GTP binding D [Source:HGNC Symbol;Acc:19903]
RSF1	remodeling and spacing factor 1 [Source:HGNC Symbol;Acc:18118]
RYR3	ryanodine receptor 3 [Source:HGNC Symbol;Acc:10485]
SDC2	syndecan 2 [Source:HGNC Symbol;Acc:10659]
SDC4	syndecan 4 [Source:HGNC Symbol;Acc:10661]
SELENBP1	selenium binding protein 1 [Source:HGNC Symbol;Acc:10719]
SERPING1	serpin peptidase inhibitor, clade G (C1 inhibitor), member 1 [Source:HGNC Symbol;Acc:1228]
SH3BP2	SH3-domain binding protein 2 [Source:HGNC Symbol;Acc:10825]
SIRT1	sirtuin 1 [Source:HGNC Symbol;Acc:14929]
SLC16A9	solute carrier family 16, member 9 [Source:HGNC Symbol;Acc:23520]
SLC22A4	solute carrier family 22 (organic cation/zwitterion transporter), member 4 [Source:HGNC Symbol;Acc:10968]
SLITRK5	SLIT and NTRK-like family, member 5 [Source:HGNC Symbol;Acc:20295]
SOX11	SRY (sex determining region Y)-box 11 [Source:HGNC Symbol;Acc:11191]
SOX2	SRY (sex determining region Y)-box 2 [Source:HGNC Symbol;Acc:11195]
SOX9	SRY (sex determining region Y)-box 9 [Source:HGNC Symbol;Acc:11204]
SPAG9	sperm associated antigen 9 [Source:HGNC Symbol;Acc:14524]
SPARC	secreted protein, acidic, cysteine-rich (osteonectin) [Source:HGNC Symbol;Acc:11219]
SPARCL1	SPARC-like 1 (hevin) [Source:HGNC Symbol;Acc:11220]
SPIN1	spindlin 1 [Source:HGNC Symbol;Acc:11243]
SPNS3	spinster homolog 3 (Drosophila) [Source:HGNC Symbol;Acc:28433]
SSBP2	single-stranded DNA binding protein 2 [Source:HGNC Symbol;Acc:15831]
ST8SIA1	ST8 alpha-N-acetyl-neuraminide alpha-2,8-sialyltransferase 1 [Source:HGNC Symbol;Acc:10869]
STOM	stomatin [Source:HGNC Symbol;Acc:3383]
SUMF1	sulfatase modifying factor 1 [Source:HGNC Symbol;Acc:20376]
SYBU	syntabulin (syntaxin-interacting) [Source:HGNC Symbol;Acc:26011]
SYNPO2	synaptopodin 2 [Source:HGNC Symbol;Acc:17732]
TCEAL2	transcription elongation factor A (SII)-like 2 [Source:HGNC Symbol;Acc:29818]
TIAM1	T-cell lymphoma invasion and metastasis 1 [Source:HGNC Symbol;Acc:11805]
TMEM123	transmembrane protein 123 [Source:HGNC Symbol;Acc:30138]
TMEM231	transmembrane protein 231 [Source:HGNC Symbol;Acc:37234]
TMEM47	transmembrane protein 47 [Source:HGNC Symbol;Acc:18515]
TSC1	tuberous sclerosis 1 [Source:HGNC Symbol;Acc:12362]
TSG101	tumor susceptibility 101 [Source:HGNC Symbol;Acc:15971]
TSPAN6	tetraspanin 6 [Source:HGNC Symbol;Acc:11858]
UHRF2	ubiquitin-like with PHD and ring finger domains 2, E3 ubiquitin protein ligase [Source:HGNC Symbol;Acc:12557]
XIAP	X-linked inhibitor of apoptosis [Source:HGNC Symbol;Acc:592]
YAP1	Yes-associated protein 1 [Source:HGNC Symbol;Acc:16262]
ZBTB41	zinc finger and BTB domain containing 41 [Source:HGNC Symbol;Acc:24819]
ZFR	zinc finger RNA binding protein [Source:HGNC Symbol;Acc:17277]
ZKSCAN4	zinc finger with KRAB and SCAN domains 4 [Source:HGNC Symbol;Acc:13854]
ZMAT3	zinc finger, matrin-type 3 [Source:HGNC Symbol;Acc:29983]
ZNF45	zinc finger protein 45 [Source:HGNC Symbol;Acc:13111]
ZNF680	zinc finger protein 680 [Source:HGNC Symbol;Acc:26897]
ZNF711	zinc finger protein 711 [Source:HGNC Symbol;Acc:13128]
ZNF784	zinc finger protein 784 [Source:HGNC Symbol;Acc:33111]
ZNF853	zinc finger protein 853 [Source:HGNC Symbol;Acc:21767]
ZNHIT6	zinc finger, HIT-type containing 6 [Source:HGNC Symbol;Acc:26089]
