# Supplementary material for: A Unique TGFB1-Driven Genomic Program Links Astrocytosis, Low-Grade Inflammation and Partial Demyelination in Periplaques of Spinal Cords from Progressive Multiple Sclerosis Patients
Source: Preprints.org preprint supplement (doi:10.20944/preprints201708.0080.v1), 2017-08-23
Supplement: Supplementary file 6 [file Data supplement 5.xlsx]

## Sheet: NDRG1 Co-expression Network
Gene Symbol	Description
ADIPOR2	adiponectin receptor 2 [Source:HGNC Symbol;Acc:24041]
ALPI	alkaline phosphatase, intestinal [Source:HGNC Symbol;Acc:437]
ANK3	ankyrin 3, node of Ranvier (ankyrin G) [Source:HGNC Symbol;Acc:494]
ANKRD40	ankyrin repeat domain 40 [Source:HGNC Symbol;Acc:28233]
ANLN	anillin, actin binding protein [Source:HGNC Symbol;Acc:14082]
AP1B1	adaptor-related protein complex 1, beta 1 subunit [Source:HGNC Symbol;Acc:554]
APLP1	amyloid beta (A4) precursor-like protein 1 [Source:HGNC Symbol;Acc:597]
ARCN1	archain 1 [Source:HGNC Symbol;Acc:649]
ARHGAP23	Rho GTPase activating protein 23 [Source:HGNC Symbol;Acc:29293]
ARPP19	cAMP-regulated phosphoprotein, 19kDa [Source:HGNC Symbol;Acc:16967]
ASPHD1	aspartate beta-hydroxylase domain containing 1 [Source:HGNC Symbol;Acc:27380]
ATP1B1	ATPase, Na+/K+ transporting, beta 1 polypeptide [Source:HGNC Symbol;Acc:804]
ATP6V0C	ATPase, H+ transporting, lysosomal 16kDa, V0 subunit c [Source:HGNC Symbol;Acc:855]
BAG6	BCL2-associated athanogene 6 [Source:HGNC Symbol;Acc:13919]
BPNT1	3'(2'), 5'-bisphosphate nucleotidase 1 [Source:HGNC Symbol;Acc:1096]
C17orf59	chromosome 17 open reading frame 59 [Source:HGNC Symbol;Acc:25939]
C7orf41	chromosome 7 open reading frame 41 [Source:HGNC Symbol;Acc:25457]
CASR	calcium-sensing receptor [Source:HGNC Symbol;Acc:1514]
CD47	CD47 molecule [Source:HGNC Symbol;Acc:1682]
CDKN1C	cyclin-dependent kinase inhibitor 1C (p57, Kip2) [Source:HGNC Symbol;Acc:1786]
CEBPE	CCAAT/enhancer binding protein (C/EBP), epsilon [Source:HGNC Symbol;Acc:1836]
CELA1	chymotrypsin-like elastase family, member 1 [Source:HGNC Symbol;Acc:3308]
CEP112	centrosomal protein 112kDa [Source:HGNC Symbol;Acc:28514]
CEP170	centrosomal protein 170kDa [Source:HGNC Symbol;Acc:28920]
CERS2	ceramide synthase 2 [Source:HGNC Symbol;Acc:14076]
CFB	complement factor B [Source:HGNC Symbol;Acc:1037]
CHST2	carbohydrate (N-acetylglucosamine-6-O) sulfotransferase 2 [Source:HGNC Symbol;Acc:1970]
CLDN11	claudin 11 [Source:HGNC Symbol;Acc:8514]
CNOT8	CCR4-NOT transcription complex, subunit 8 [Source:HGNC Symbol;Acc:9207]
CNTN2	contactin 2 (axonal) [Source:HGNC Symbol;Acc:2172]
COX5B	cytochrome c oxidase subunit Vb [Source:HGNC Symbol;Acc:2269]
COX7A2	cytochrome c oxidase subunit VIIa polypeptide 2 (liver) [Source:HGNC Symbol;Acc:2288]
CREB3L3	cAMP responsive element binding protein 3-like 3 [Source:HGNC Symbol;Acc:18855]
CYCS	cytochrome c, somatic [Source:HGNC Symbol;Acc:19986]
CYTH1	cytohesin 1 [Source:HGNC Symbol;Acc:9501]
DCTPP1	dCTP pyrophosphatase 1 [Source:HGNC Symbol;Acc:28777]
DHCR24	24-dehydrocholesterol reductase [Source:HGNC Symbol;Acc:2859]
DNAJC6	DnaJ (Hsp40) homolog, subfamily C, member 6 [Source:HGNC Symbol;Acc:15469]
DOCK1	dedicator of cytokinesis 1 [Source:HGNC Symbol;Acc:2987]
DPYD	dihydropyrimidine dehydrogenase [Source:HGNC Symbol;Acc:3012]
DPYSL5	dihydropyrimidinase-like 5 [Source:HGNC Symbol;Acc:20637]
DRD2	dopamine receptor D2 [Source:HGNC Symbol;Acc:3023]
DTNB	dystrobrevin, beta [Source:HGNC Symbol;Acc:3058]
DUSP26	dual specificity phosphatase 26 (putative) [Source:HGNC Symbol;Acc:28161]
EDIL3	EGF-like repeats and discoidin I-like domains 3 [Source:HGNC Symbol;Acc:3173]
EEF1A1	eukaryotic translation elongation factor 1 alpha 1 [Source:HGNC Symbol;Acc:3189]
EEF1B2	eukaryotic translation elongation factor 1 beta 2 [Source:HGNC Symbol;Acc:3208]
ELAVL3	ELAV like neuron-specific RNA binding protein 3 [Source:HGNC Symbol;Acc:3314]
ELOVL7	ELOVL fatty acid elongase 7 [Source:HGNC Symbol;Acc:26292]
ENPP6	ectonucleotide pyrophosphatase/phosphodiesterase 6 [Source:HGNC Symbol;Acc:23409]
ERMN	ermin, ERM-like protein [Source:HGNC Symbol;Acc:29208]
ETFB	electron-transfer-flavoprotein, beta polypeptide [Source:HGNC Symbol;Acc:3482]
FAM124A	family with sequence similarity 124A [Source:HGNC Symbol;Acc:26413]
FAM19A4	family with sequence similarity 19 (chemokine (C-C motif)-like), member A4 [Source:HGNC Symbol;Acc:21591]
FBXL14	F-box and leucine-rich repeat protein 14 [Source:HGNC Symbol;Acc:28624]
FBXO7	F-box protein 7 [Source:HGNC Symbol;Acc:13586]
FLYWCH2	FLYWCH family member 2 [Source:HGNC Symbol;Acc:25178]
FOXA2	forkhead box A2 [Source:HGNC Symbol;Acc:5022]
FTH1	ferritin, heavy polypeptide 1 [Source:HGNC Symbol;Acc:3976]
GAB2	GRB2-associated binding protein 2 [Source:HGNC Symbol;Acc:14458]
GALK1	galactokinase 1 [Source:HGNC Symbol;Acc:4118]
GAS7	growth arrest-specific 7 [Source:HGNC Symbol;Acc:4169]
GATA1	GATA binding protein 1 (globin transcription factor 1) [Source:HGNC Symbol;Acc:4170]
GATS	GATS, stromal antigen 3 opposite strand [Source:HGNC Symbol;Acc:29954]
GCA	grancalcin, EF-hand calcium binding protein [Source:HGNC Symbol;Acc:15990]
GPIHBP1	glycosylphosphatidylinositol anchored high density lipoprotein binding protein 1 [Source:HGNC Symbol;Acc:24945]
GPM6B	glycoprotein M6B [Source:HGNC Symbol;Acc:4461]
GPR27	G protein-coupled receptor 27 [Source:HGNC Symbol;Acc:4482]
GPR37	G protein-coupled receptor 37 (endothelin receptor type B-like) [Source:HGNC Symbol;Acc:4494]
GPR62	G protein-coupled receptor 62 [Source:HGNC Symbol;Acc:13301]
HAPLN2	hyaluronan and proteoglycan link protein 2 [Source:HGNC Symbol;Acc:17410]
HM13	histocompatibility (minor) 13 [Source:HGNC Symbol;Acc:16435]
HOXD4	homeobox D4 [Source:HGNC Symbol;Acc:5138]
HSD11B1L	hydroxysteroid (11-beta) dehydrogenase 1-like [Source:HGNC Symbol;Acc:30419]
HTRA1	HtrA serine peptidase 1 [Source:HGNC Symbol;Acc:9476]
INSL3	insulin-like 3 (Leydig cell) [Source:HGNC Symbol;Acc:6086]
ITGB1BP1	integrin beta 1 binding protein 1 [Source:HGNC Symbol;Acc:23927]
KCNK12	potassium channel, subfamily K, member 12 [Source:HGNC Symbol;Acc:6274]
KIAA1257	KIAA1257 [Source:HGNC Symbol;Acc:29231]
KIAA1598	KIAA1598 [Source:HGNC Symbol;Acc:29319]
KIF5B	kinesin family member 5B [Source:HGNC Symbol;Acc:6324]
KLHL42	kelch-like family member 42 [Source:HGNC Symbol;Acc:29252]
KY	kyphoscoliosis peptidase [Source:HGNC Symbol;Acc:26576]
LHPP	phospholysine phosphohistidine inorganic pyrophosphate phosphatase [Source:HGNC Symbol;Acc:30042]
LPAR1	lysophosphatidic acid receptor 1 [Source:HGNC Symbol;Acc:3166]
MAP4	microtubule-associated protein 4 [Source:HGNC Symbol;Acc:6862]
MAP7D1	MAP7 domain containing 1 [Source:HGNC Symbol;Acc:25514]
MBP	myelin basic protein [Source:HGNC Symbol;Acc:6925]
MCF2L	MCF.2 cell line derived transforming sequence-like [Source:HGNC Symbol;Acc:14576]
MFN1	mitofusin 1 [Source:HGNC Symbol;Acc:18262]
MOBP	myelin-associated oligodendrocyte basic protein [Source:HGNC Symbol;Acc:7189]
MOSPD2	motile sperm domain containing 2 [Source:HGNC Symbol;Acc:28381]
MST1R	macrophage stimulating 1 receptor (c-met-related tyrosine kinase) [Source:HGNC Symbol;Acc:7381]
MT1G	metallothionein 1G [Source:HGNC Symbol;Acc:7399]
MTG1	mitochondrial ribosome-associated GTPase 1 [Source:HGNC Symbol;Acc:32159]
MYLK	myosin light chain kinase [Source:HGNC Symbol;Acc:7590]
MYO1D	myosin ID [Source:HGNC Symbol;Acc:7598]
NDE1	nudE neurodevelopment protein 1 [Source:HGNC Symbol;Acc:17619]
NDRG1	N-myc downstream regulated 1 [Source:HGNC Symbol;Acc:7679]
NDST4	N-deacetylase/N-sulfotransferase (heparan glucosaminyl) 4 [Source:HGNC Symbol;Acc:20779]
NDUFB2	NADH dehydrogenase (ubiquinone) 1 beta subcomplex, 2, 8kDa [Source:HGNC Symbol;Acc:7697]
NDUFB5	NADH dehydrogenase (ubiquinone) 1 beta subcomplex, 5, 16kDa [Source:HGNC Symbol;Acc:7700]
NIPA1	non imprinted in Prader-Willi/Angelman syndrome 1 [Source:HGNC Symbol;Acc:17043]
NIPAL3	NIPA-like domain containing 3 [Source:HGNC Symbol;Acc:25233]
NLK	nemo-like kinase [Source:HGNC Symbol;Acc:29858]
NRG1	neuregulin 1 [Source:HGNC Symbol;Acc:7997]
NUDT2	nudix (nucleoside diphosphate linked moiety X)-type motif 2 [Source:HGNC Symbol;Acc:8049]
PACS2	phosphofurin acidic cluster sorting protein 2 [Source:HGNC Symbol;Acc:23794]
PAQR6	progestin and adipoQ receptor family member VI [Source:HGNC Symbol;Acc:30132]
PAQR8	progestin and adipoQ receptor family member VIII [Source:HGNC Symbol;Acc:15708]
PDE6D	phosphodiesterase 6D, cGMP-specific, rod, delta [Source:HGNC Symbol;Acc:8788]
PEA15	phosphoprotein enriched in astrocytes 15 [Source:HGNC Symbol;Acc:8822]
PIGS	phosphatidylinositol glycan anchor biosynthesis, class S [Source:HGNC Symbol;Acc:14937]
PIP4K2A	phosphatidylinositol-5-phosphate 4-kinase, type II, alpha [Source:HGNC Symbol;Acc:8997]
PKP4	plakophilin 4 [Source:HGNC Symbol;Acc:9026]
PLA2G16	phospholipase A2, group XVI [Source:HGNC Symbol;Acc:17825]
PLCL1	phospholipase C-like 1 [Source:HGNC Symbol;Acc:9063]
PLP1	proteolipid protein 1 [Source:HGNC Symbol;Acc:9086]
POLR2D	polymerase (RNA) II (DNA directed) polypeptide D [Source:HGNC Symbol;Acc:9191]
PPA1	pyrophosphatase (inorganic) 1 [Source:HGNC Symbol;Acc:9226]
PPEF1	protein phosphatase, EF-hand calcium binding domain 1 [Source:HGNC Symbol;Acc:9243]
PPIA	peptidylprolyl isomerase A (cyclophilin A) [Source:HGNC Symbol;Acc:9253]
PREB	prolactin regulatory element binding [Source:HGNC Symbol;Acc:9356]
PROX1	prospero homeobox 1 [Source:HGNC Symbol;Acc:9459]
PSG3	pregnancy specific beta-1-glycoprotein 3 [Source:HGNC Symbol;Acc:9520]
PTPN2	protein tyrosine phosphatase, non-receptor type 2 [Source:HGNC Symbol;Acc:9650]
RAB11FIP4	RAB11 family interacting protein 4 (class II) [Source:HGNC Symbol;Acc:30267]
RAB40B	RAB40B, member RAS oncogene family [Source:HGNC Symbol;Acc:18284]
RAB8B	RAB8B, member RAS oncogene family [Source:HGNC Symbol;Acc:30273]
RABGGTB	Rab geranylgeranyltransferase, beta subunit [Source:HGNC Symbol;Acc:9796]
RAPGEF5	Rap guanine nucleotide exchange factor (GEF) 5 [Source:HGNC Symbol;Acc:16862]
RASSF2	Ras association (RalGDS/AF-6) domain family member 2 [Source:HGNC Symbol;Acc:9883]
RGS8	regulator of G-protein signaling 8 [Source:HGNC Symbol;Acc:16810]
RPL10A	ribosomal protein L10a [Source:HGNC Symbol;Acc:10299]
RPL22	ribosomal protein L22 [Source:HGNC Symbol;Acc:10315]
RPL30	ribosomal protein L30 [Source:HGNC Symbol;Acc:10333]
RPL36AL	ribosomal protein L36a-like [Source:HGNC Symbol;Acc:10346]
RPL37	ribosomal protein L37 [Source:HGNC Symbol;Acc:10347]
RPL37A	ribosomal protein L37a [Source:HGNC Symbol;Acc:10348]
RPL38	ribosomal protein L38 [Source:HGNC Symbol;Acc:10349]
RPL4	ribosomal protein L4 [Source:HGNC Symbol;Acc:10353]
RPLP1	ribosomal protein, large, P1 [Source:HGNC Symbol;Acc:10372]
RPS12	ribosomal protein S12 [Source:HGNC Symbol;Acc:10385]
RPS18	ribosomal protein S18 [Source:HGNC Symbol;Acc:10401]
RPS2	ribosomal protein S2 [Source:HGNC Symbol;Acc:10404]
RPS27A	ribosomal protein S27a [Source:HGNC Symbol;Acc:10417]
RPS6	ribosomal protein S6 [Source:HGNC Symbol;Acc:10429]
S100A13	S100 calcium binding protein A13 [Source:HGNC Symbol;Acc:10490]
SAP18	Sin3A-associated protein, 18kDa [Source:HGNC Symbol;Acc:10530]
SCG5	secretogranin V (7B2 protein) [Source:HGNC Symbol;Acc:10816]
SEMA7A	semaphorin 7A, GPI membrane anchor (John Milton Hagen blood group) [Source:HGNC Symbol;Acc:10741]
SERPINI1	serpin peptidase inhibitor, clade I (neuroserpin), member 1 [Source:HGNC Symbol;Acc:8943]
SH3PXD2A	SH3 and PX domains 2A [Source:HGNC Symbol;Acc:23664]
SLC1A1	solute carrier family 1 (neuronal/epithelial high affinity glutamate transporter, system Xag), member 1 [Source:HGNC Symbol;Acc:10939]
SLC22A16	solute carrier family 22 (organic cation/carnitine transporter), member 16 [Source:HGNC Symbol;Acc:20302]
SLC25A11	solute carrier family 25 (mitochondrial carrier; oxoglutarate carrier), member 11 [Source:HGNC Symbol;Acc:10981]
SLC27A6	solute carrier family 27 (fatty acid transporter), member 6 [Source:HGNC Symbol;Acc:11000]
SLC5A11	solute carrier family 5 (sodium/inositol cotransporter), member 11 [Source:HGNC Symbol;Acc:23091]
SORT1	sortilin 1 [Source:HGNC Symbol;Acc:11186]
SOS2	son of sevenless homolog 2 (Drosophila) [Source:HGNC Symbol;Acc:11188]
SPO11	SPO11 meiotic protein covalently bound to DSB [Source:HGNC Symbol;Acc:11250]
STK39	serine threonine kinase 39 [Source:HGNC Symbol;Acc:17717]
STXBP6	syntaxin binding protein 6 (amisyn) [Source:HGNC Symbol;Acc:19666]
SYNJ2	synaptojanin 2 [Source:HGNC Symbol;Acc:11504]
SYNM	synemin, intermediate filament protein [Source:HGNC Symbol;Acc:24466]
TACR2	tachykinin receptor 2 [Source:HGNC Symbol;Acc:11527]
TAS2R4	taste receptor, type 2, member 4 [Source:HGNC Symbol;Acc:14911]
TATDN1	TatD DNase domain containing 1 [Source:HGNC Symbol;Acc:24220]
TBC1D10B	TBC1 domain family, member 10B [Source:HGNC Symbol;Acc:24510]
TCEAL4	transcription elongation factor A (SII)-like 4 [Source:HGNC Symbol;Acc:26121]
TECR	trans-2,3-enoyl-CoA reductase [Source:HGNC Symbol;Acc:4551]
TF	transferrin [Source:HGNC Symbol;Acc:11740]
TMEM144	transmembrane protein 144 [Source:HGNC Symbol;Acc:25633]
TMEM217	transmembrane protein 217 [Source:HGNC Symbol;Acc:21238]
TMEM229B	transmembrane protein 229B [Source:HGNC Symbol;Acc:20130]
TMEM52	transmembrane protein 52 [Source:HGNC Symbol;Acc:27916]
TP53INP2	tumor protein p53 inducible nuclear protein 2 [Source:HGNC Symbol;Acc:16104]
TRAK2	trafficking protein, kinesin binding 2 [Source:HGNC Symbol;Acc:13206]
TRPC4AP	transient receptor potential cation channel, subfamily C, member 4 associated protein [Source:HGNC Symbol;Acc:16181]
TRPM6	transient receptor potential cation channel, subfamily M, member 6 [Source:HGNC Symbol;Acc:17995]
TSPAN15	tetraspanin 15 [Source:HGNC Symbol;Acc:23298]
TTYH2	tweety family member 2 [Source:HGNC Symbol;Acc:13877]
TUBB	tubulin, beta class I [Source:HGNC Symbol;Acc:20778]
TYRO3	TYRO3 protein tyrosine kinase [Source:HGNC Symbol;Acc:12446]
UBXN1	UBX domain protein 1 [Source:HGNC Symbol;Acc:18402]
UGT8	UDP glycosyltransferase 8 [Source:HGNC Symbol;Acc:12555]
UNC13A	unc-13 homolog A (C. elegans) [Source:HGNC Symbol;Acc:23150]
UQCRB	ubiquinol-cytochrome c reductase binding protein [Source:HGNC Symbol;Acc:12582]
VAT1L	vesicle amine transport 1-like [Source:HGNC Symbol;Acc:29315]
VKORC1L1	vitamin K epoxide reductase complex, subunit 1-like 1 [Source:HGNC Symbol;Acc:21492]
VPS37C	vacuolar protein sorting 37 homolog C (S. cerevisiae) [Source:HGNC Symbol;Acc:26097]
WDR88	WD repeat domain 88 [Source:HGNC Symbol;Acc:26999]
WNK1	WNK lysine deficient protein kinase 1 [Source:HGNC Symbol;Acc:14540]
WNT3	wingless-type MMTV integration site family, member 3 [Source:HGNC Symbol;Acc:12782]
ZC2HC1B	zinc finger, C2HC-type containing 1B [Source:HGNC Symbol;Acc:21174]
ZCCHC24	zinc finger, CCHC domain containing 24 [Source:HGNC Symbol;Acc:26911]
ZNF214	zinc finger protein 214 [Source:HGNC Symbol;Acc:13006]
ZNF365	zinc finger protein 365 [Source:HGNC Symbol;Acc:18194]
ZNF536	zinc finger protein 536 [Source:HGNC Symbol;Acc:29025]
ZNF672	zinc finger protein 672 [Source:HGNC Symbol;Acc:26179]
ZNF92	zinc finger protein 92 [Source:HGNC Symbol;Acc:13168]
