# Supplementary material for: A Unique TGFB1-Driven Genomic Program Links Astrocytosis, Low-Grade Inflammation and Partial Demyelination in Periplaques of Spinal Cords from Progressive Multiple Sclerosis Patients
Source: Preprints.org preprint supplement (doi:10.20944/preprints201708.0080.v1), 2017-08-23
Supplement: Supplementary file 7 [file data supplement 6.xlsx]

## Sheet: NDRG1 protein interactants
Protein Symbol	Description
ACSL3	acyl-CoA synthetase long-chain family member 3
ACTG1	actin gamma 1
AP1M2	adaptor-related protein complex 1, mu 2 subunit
AP2M1	adaptor-related protein complex 2, mu 1 subunit
ARL4D	ADP-ribosylation factor-like 4D
ATP1A1	ATPase, Na+/K+ transporting, alpha 1 polypeptide
CANX	calnexin
CDH1	cadherin 1, type 1, E-cadherin (epithelial)
CLTC	clathrin, heavy chain (Hc)
CNDP2	CNDP dipeptidase 2 (metallopeptidase M20 family)
COPB2	coatomer protein complex, subunit beta 2 (beta prime)
CTNNB1	catenin (cadherin-associated protein), beta 1, 88kDa
DDX1	DEAD (Asp-Glu-Ala-Asp) box helicase 1
DDX5	DEAD (Asp-Glu-Ala-Asp) box helicase 5
DLST	dihydrolipoamide S-succinyltransferase (E2 component of 2-oxo-glutarate complex)
EEF1G	eukaryotic translation elongation factor 1 gamma
EEF2	eukaryotic translation elongation factor 2
EIF2S3	eukaryotic translation initiation factor 2, subunit 3 gamma, 52kDa
EIF3E	eukaryotic translation initiation factor 3, subunit E
EWSR1	EWS RNA-binding protein 1
FASN	fatty acid synthase
HNRNPF	heterogeneous nuclear ribonucleoprotein F
HNRNPH1	heterogeneous nuclear ribonucleoprotein H1 (H)
HNRNPU	heterogeneous nuclear ribonucleoprotein U (scaffold attachment factor A)
HSD17B4	hydroxysteroid (17-beta) dehydrogenase 4
HSP90AA1	heat shock protein 90kDa alpha (cytosolic), class A member 1
HSPA5	heat shock 70kDa protein 5 (glucose-regulated protein, 78kDa)
ILF3	interleukin enhancer binding factor 3, 90kDa
KIF5B	kinesin family member 5B
LDHA	lactate dehydrogenase A
MAOA	monoamine oxidase A
MLH1	mutL homolog 1
MME	membrane metallo-endopeptidase
NCL	nucleolin
PABPC1	poly(A) binding protein, cytoplasmic 1
PHYHIP	phytanoyl-CoA 2-hydroxylase interacting protein
PKM	pyruvate kinase, muscle
PPP2R2A	protein phosphatase 2, regulatory subunit B, alpha
PRKACA	protein kinase, cAMP-dependent, catalytic, alpha
PSMC2	proteasome (prosome, macropain) 26S subunit, ATPase, 2
PSMC3	proteasome (prosome, macropain) 26S subunit, ATPase, 3
PSMD2	proteasome (prosome, macropain) 26S subunit, non-ATPase, 2
RPL24	ribosomal protein L24
RPL3	ribosomal protein L3
RPL4	ribosomal protein L4
RPN2	ribophorin II
RPS16	ribosomal protein S16
RPS20	ribosomal protein S20
RPS26	ribosomal protein S26
RPS3	ribosomal protein S3
RPS6	ribosomal protein S6
RPS8	ribosomal protein S8
RUVBL2	RuvB-like AAA ATPase 2
S100B	S100 calcium binding protein B
SEC23A	Sec23 homolog A (S. cerevisiae)
SGK1	serum/glucocorticoid regulated kinase 1
SHMT2	serine hydroxymethyltransferase 2 (mitochondrial)
TAF9	TAF9 RNA polymerase II, TATA box binding protein (TBP)-associated factor, 32kDa
TARS	threonyl-tRNA synthetase
TLE3	transducin-like enhancer of split 3
UPF1	UPF1 regulator of nonsense transcripts homolog (yeast)
VCP	valosin containing protein
XRCC5	X-ray repair complementing defective repair in Chinese hamster cells 5 (double-strand-break rejoining)
ZNF155	zinc finger protein 155
